# Supplementary material
Source: PubMed Central journal article supplement (PMC7315607)
Supplement: ao0c01129_si_001.pdf [file ao0c01129_si_001.pdf]

# Thiosemicarbazone-modified cellulose: synthesis, characterization and adsorption studies on Cu(II) removal

Tien A. Nguyen<sup>1,2</sup>, Dang B. Tran<sup>3\*</sup>, Hien Dat C. Le<sup>3</sup>, Quang L. Nguyen<sup>4</sup>, Vinh Pham<sup>5\*</sup>

<sup>1</sup>*Department for Management of Science and Technology Development, Ton Duc Thang University, Ho Chi Minh City, Vietnam*

<sup>2</sup>*Faculty of Applied Sciences, Ton Duc Thang University, Ho Chi Minh City, Vietnam*

<sup>3</sup>*Ho Chi Minh City University of Education, Ho Chi Minh City, Vietnam*

<sup>4</sup>*Le Hong Phong High School for the Gifted, Ho Chi Minh City, Vietnam*

<sup>5</sup>*Institute of Research and Development, Duy Tan University, Da Nang 550000, Vietnam*

\* *Co-corresponding author: Institute of Research and Development, Duy Tan University, Da Nang 550000, Vietnam*

Email addresses: [nguyenanhtien@tdtu.edu.vn](mailto:nguyenanhtien@tdtu.edu.vn) (T.A. Nguyen); [dangtb@hcmue.edu.vn](mailto:dangtb@hcmue.edu.vn) (D.B. Tran), [lechihientat@gmail.com](mailto:lechihientat@gmail.com) (H.D.C. Le) [quanglhp172@gmail.com](mailto:quanglhp172@gmail.com) (Q.L. Nguyen); [nguyenphanhvinh@duytan.edu.vn](mailto:nguyenphanhvinh@duytan.edu.vn) (V. Pham).

**Table S1.** Error in titration method of buffer solution

|                                    | <b>Na<sub>2</sub>S<sub>2</sub>O<sub>3</sub> Volume</b> | <b>Average V</b> | <b>mmol CHO</b> | <b>Average mmol</b> | <b>CV</b> |
|------------------------------------|--------------------------------------------------------|------------------|-----------------|---------------------|-----------|
| <b>AcOH</b>                        |                                                        |                  |                 |                     |           |
| <b>Blank</b>                       | 0.95±0.072                                             | 0.98±0.072       | 0.52±0.035      | 0.50±0.035          | 2.8284    |
|                                    | 1.00±0.072                                             |                  | 0.50±0.035      |                     |           |
|                                    | 1.00±0.072                                             |                  |                 |                     |           |
| <b>Sample</b>                      | 0.70±0.072                                             | 0.73±0.072       | 0.50±0.035      |                     |           |
|                                    | 0.75±0.072                                             |                  |                 |                     |           |
|                                    | 0.75±0.072                                             |                  |                 |                     |           |
| <b>H<sub>2</sub>SO<sub>4</sub></b> |                                                        |                  |                 |                     |           |
| <b>Blank</b>                       | 1.05±0.072                                             | 1.03±0.072       | 0.62±0.035      | 0.60±0.035          | 2.3570    |
|                                    | 1.05±0.072                                             |                  | 0.60±0.035      |                     |           |
|                                    | 1.00±0.072                                             |                  |                 |                     |           |
| <b>Sample</b>                      | 0.75±0.072                                             | 0.73±0.072       | 0.60±0.035      |                     |           |
|                                    | 0.75±0.072                                             |                  |                 |                     |           |
|                                    | 0.70±0.072                                             |                  |                 |                     |           |
| <b>H<sub>3</sub>PO<sub>4</sub></b> |                                                        |                  |                 |                     |           |
| <b>Blank</b>                       | 1.00±0.072                                             | 1.02±0.072       | 0.60±0.043      | 0.59±0.043          | 2.9356    |
|                                    | 1.05±0.072                                             |                  | 0.60±0.043      |                     |           |
|                                    | 1.05±0.072                                             |                  |                 |                     |           |
| <b>Sample</b>                      | 0.70±0.072                                             | 0.73±0.072       | 0.57±0.043      |                     |           |
|                                    | 0.75±0.072                                             |                  |                 |                     |           |
|                                    | 0.75±0.072                                             |                  |                 |                     |           |

**Table S2.** Error in UV-Vis method of buffer solution

|                                    | Optical density | Average OD    | mmol CHO   | Average mmol | CV     |
|------------------------------------|-----------------|---------------|------------|--------------|--------|
| <b>AcOH</b>                        |                 |               |            |              |        |
| <b>Blank</b>                       | 0.5703±0.0006   | 0.5702±0.0006 | 0.58±0.030 | 0.59±0.030   | 2.0758 |
|                                    | 0.5700±0.0006   |               | 0.60±0.030 |              |        |
|                                    | 0.5705±0.0006   |               |            |              |        |
| <b>Sample</b>                      | 0.5010±0.0072   | 0.5042±0.0072 | 0.60±0.030 |              |        |
|                                    | 0.5067±0.0072   |               |            |              |        |
|                                    | 0.5050±0.0072   |               |            |              |        |
| <b>H<sub>2</sub>SO<sub>4</sub></b> |                 |               |            |              |        |
| <b>Blank</b>                       | 0.5602±0.0104   | 0.5557±0.0104 | 0.58±0.025 | 0.58±0.025   | 1.7241 |
|                                    | 0.5551±0.0104   |               | 0.59±0.025 |              |        |
|                                    | 0.5519±0.0104   |               |            |              |        |
| <b>Sample</b>                      | 0.5011±0.0071   | 0.5041±0.0071 | 0.59±0.025 |              |        |
|                                    | 0.5045±0.0071   |               |            |              |        |
|                                    | 0.5068±0.0071   |               |            |              |        |
| <b>H<sub>3</sub>PO<sub>4</sub></b> |                 |               |            |              |        |
| <b>Blank</b>                       | 0.5600±0.0070   | 0.5584±0.0070 | 0.55±0.065 | 0.52±0.065   | 5.0879 |
|                                    | 0.5552±0.0070   |               | 0.50±0.065 |              |        |
|                                    | 0.5602±0.0070   |               |            |              |        |
| <b>Sample</b>                      | 0.5040±0.0053   | 0.5064±0.0053 | 0.53±0.065 |              |        |
|                                    | 0.5082±0.0053   |               |            |              |        |
|                                    | 0.5069±0.0053   |               |            |              |        |

**Table S3.** Fisher statistical of buffer solution

|                                    | Titration  |            | S <sup>2</sup>     | UV-Vis     |            | S <sup>2</sup>       | F     |
|------------------------------------|------------|------------|--------------------|------------|------------|----------------------|-------|
|                                    | mmol       | Average x  |                    | mmol       | Average x  |                      |       |
| <b>AcOH</b>                        |            |            |                    |            |            |                      |       |
| (1)                                | 0.52±0.035 | 0.50±0.035 | 4x10 <sup>-4</sup> | 0.58±0.030 | 0.59±0.030 | 1.5x10 <sup>-4</sup> | 2.667 |
| (2)                                | 0.50±0.035 |            |                    | 0.60±0.030 |            |                      |       |
| (3)                                | 0.50±0.035 |            |                    | 0.60±0.030 |            |                      |       |
| <b>H<sub>2</sub>SO<sub>4</sub></b> |            |            |                    |            |            |                      |       |
| (1)                                | 0.62±0.035 | 0.60±0.035 | 4x10 <sup>-4</sup> | 0.58±0.025 | 0.58±0.025 | 1x10 <sup>-4</sup>   | 4     |
| (2)                                | 0.60±0.035 |            |                    | 0.59±0.025 |            |                      |       |
| (3)                                | 0.60±0.035 |            |                    | 0.59±0.025 |            |                      |       |
| <b>H<sub>3</sub>PO<sub>4</sub></b> |            |            |                    |            |            |                      |       |
| (1)                                | 0.60±0.043 | 0.59±0.043 | 3x10 <sup>-4</sup> | 0.55±0.065 | 0.52±0.065 | 7x10 <sup>-4</sup>   | 2.333 |
| (2)                                | 0.60±0.043 |            |                    | 0.50±0.065 |            |                      |       |
| (3)                                | 0.57±0.043 |            |                    | 0.53±0.065 |            |                      |       |

**Table S4.** Student statistical of buffer solution

| <b>Component</b>                 | <b>Titration</b> | <b>UV-Vis</b> | <b><math>d_i</math></b>        | <b><math>d_i - d_{tb}</math></b> | <b><math>(d_i - d_{tb})^2</math></b> |
|----------------------------------|------------------|---------------|--------------------------------|----------------------------------|--------------------------------------|
| AcOH                             | 0.50             | 0.59          | -0.09                          | -0.09                            | 0.0081                               |
| H <sub>2</sub> SO <sub>4</sub>   | 0.60             | 0.58          | 0.02                           | 0.02                             | 0.0004                               |
| H <sub>3</sub> PO <sub>4</sub>   | 0.59             | 0.52          | 0.07                           | 0.07                             | 0.0049                               |
|                                  |                  |               | <b><math>d_{tb} = 0</math></b> |                                  | <b>Total = 0.0134</b>                |
| <b><math>s_d = 0.0578</math></b> |                  |               |                                |                                  |                                      |
| <b><math>t = 0</math></b>        |                  |               |                                |                                  |                                      |

**Table S5.** ANOVA two-factor with replication of buffer solution

| <b>Anova: Two-Factor With Replication</b> |             |            |           |              |
|-------------------------------------------|-------------|------------|-----------|--------------|
| <b>SUMMARY</b>                            | <b>AcOH</b> | <b>SO4</b> | <b>PP</b> | <b>Total</b> |
| <b>Count</b>                              | 3           | 3          | 3         | 9            |
| <b>Sum</b>                                | 1.52        | 1.82       | 1.77      | 5.11         |
| <b>Average</b>                            | 0.506667    | 0.606667   | 0.59      | 0.567778     |
| <b>Variance</b>                           | 0.000133    | 0.000133   | 0.0003    | 0.002294     |
|                                           |             |            |           |              |
| <b>Count</b>                              | 3           | 3          | 3         | 9            |
| <b>Sum</b>                                | 1.78        | 1.76       | 1.58      | 5.12         |
| <b>Average</b>                            | 0.593333    | 0.586667   | 0.526667  | 0.568889     |
| <b>Variance</b>                           | 0.000133    | 3.33E-05   | 0.000633  | 0.001211     |
|                                           |             |            |           |              |
| <b>Total</b>                              |             |            |           |              |
| <b>Count</b>                              | 6           | 6          | 6         |              |
| <b>Sum</b>                                | 3.3         | 3.58       | 3.35      |              |
| <b>Average</b>                            | 0.55        | 0.596667   | 0.558333  |              |
| <b>Variance</b>                           | 0.00236     | 0.000187   | 0.001577  |              |

| <b>ANOVA</b>         |           |           |           |          |                |               |
|----------------------|-----------|-----------|-----------|----------|----------------|---------------|
| <b>Source</b>        | <b>SS</b> | <b>df</b> | <b>MS</b> | <b>F</b> | <b>P-value</b> | <b>F crit</b> |
| <b>Method (A)</b>    | 5.56E-06  | 1         | 5.56E-06  | 0.02439  | 0.878493       | 4.747225      |
| <b>Component (B)</b> | 0.007433  | 2         | 0.003717  | 0.31707  | 0.000378       | 3.885294      |
| <b>Interaction</b>   | 0.017878  | 2         | 0.008939  | 0.22439  | 5.44E-06       | 3.885294      |
| <b>Error</b>         | 0.002733  | 12        | 0.000228  |          |                |               |
|                      |           |           |           |          |                |               |
| <b>Total</b>         | 0.02805   | 17        |           |          |                |               |

**Table S6.** Error in titration method of pH buffer solution

|                 | Na <sub>2</sub> S <sub>2</sub> O <sub>3</sub> Volume | Average V  | mmol CHO   | Average mmol | CV     |
|-----------------|------------------------------------------------------|------------|------------|--------------|--------|
| <b>pH = 2.0</b> |                                                      |            |            |              |        |
| <b>Blank</b>    | 1.75±0.072                                           | 1.73±0.072 | 0.40±0.124 | 0.45±0.124   | 11.111 |
|                 | 1.75±0.072                                           |            | 0.50±0.124 |              |        |
|                 | 1.70±0.072                                           |            |            |              |        |
| <b>Sample</b>   | 1.70±0.072                                           | 1.68±0.072 | 0.45±0.124 |              |        |
|                 | 1.70±0.072                                           |            |            |              |        |
|                 | 1.65±0.072                                           |            |            |              |        |
| <b>pH = 2.5</b> |                                                      |            |            |              |        |
| <b>Blank</b>    | 2.05±0.072                                           | 2.03±0.072 | 3.00±0.124 | 2.83±0.017   | 0.249  |
|                 | 2.05±0.072                                           |            | 3.05±0.124 |              |        |
|                 | 2.00±0.072                                           |            |            |              |        |
| <b>Sample</b>   | 1.75±0.072                                           | 1.73±0.072 | 2.90±0.124 |              |        |
|                 | 1.75±0.072                                           |            |            |              |        |
|                 | 1.70±0.072                                           |            |            |              |        |
| <b>pH = 3</b>   |                                                      |            |            |              |        |
| <b>Blank</b>    | 2.05±0.072                                           | 2.02±0.072 | 4.05±0.072 | 3.33±0.017   | 0.2123 |
|                 | 2.00±0.072                                           |            | 4.00±0.072 |              |        |
|                 | 2.00±0.072                                           |            |            |              |        |
| <b>Sample</b>   | 1.60±0.000                                           | 1.60±0.000 | 4.00±0.072 |              |        |
|                 | 1.60±0.000                                           |            |            |              |        |
|                 | 1.60±0.000                                           |            |            |              |        |
| <b>pH = 3.5</b> |                                                      |            |            |              |        |
| <b>Blank</b>    | 1.90±0.144                                           | 1.96±0.144 | 2.00±0.189 | 1.98±0.189   | 3.863  |
|                 | 2.00±0.144                                           |            | 1.90±0.189 |              |        |
|                 | 2.00±0.144                                           |            |            |              |        |
| <b>Sample</b>   | 1.70±0.124                                           | 1.75±0.124 | 2.05±0.189 |              |        |
|                 | 1.75±0.124                                           |            |            |              |        |
|                 | 1.70±0.017                                           |            |            |              |        |
| <b>pH = 4</b>   |                                                      |            |            |              |        |
| <b>Blank</b>    | 1.80±0.144                                           | 1.73±0.144 | 1.10±0.144 | 1.03±0.144   | 5.619  |
|                 | 1.70±0.144                                           |            | 1.00±0.144 |              |        |
|                 | 1.70±0.144                                           |            |            |              |        |
| <b>Sample</b>   | 1.65±0.072                                           | 1.62±0.072 |            |              |        |

|                 |            |            |            |            |        |
|-----------------|------------|------------|------------|------------|--------|
|                 | 1.60±0.072 |            | 1.00±0.144 |            |        |
|                 | 1.60±0.072 |            |            |            |        |
| <b>pH = 4.5</b> |            |            |            |            |        |
| <b>Blank</b>    | 1.70±0.143 | 1.73±0.143 | 0.95±0.072 | 0.98±0.072 | 2.975  |
|                 | 1.80±0.143 |            |            |            |        |
|                 | 1.70±0.143 |            | 1.00±0.072 |            |        |
| <b>Sample</b>   | 1.65±0.124 | 1.65±0.124 |            |            |        |
|                 | 1.70±0.124 |            | 1.00±0.072 |            |        |
|                 | 1.60±0.124 |            |            |            |        |
| <b>pH = 5</b>   |            |            |            |            |        |
| <b>Blank</b>    | 1.80±0.072 | 1.78±0.072 | 0.00±0.215 | 0.05±0.215 | 17.320 |
|                 | 1.80±0.072 |            |            |            |        |
|                 | 1.75±0.072 |            | 0.00±0.215 |            |        |
| <b>Sample</b>   | 1.80±0.144 | 1.76±0.144 |            |            |        |
|                 | 1.80±0.144 |            | 0.15±0.215 |            |        |
|                 | 1.70±0.035 |            |            |            |        |



**Table S7.** Error in UV-Vis method of pH buffer solution

|                 | Optical density | Average OD    | mmol CHO   | Average mmol | CV      |
|-----------------|-----------------|---------------|------------|--------------|---------|
| <b>pH = 2.0</b> |                 |               |            |              |         |
| <b>Blank</b>    | 0.7282±0.0018   | 0.7285±0.0018 | 0.27±0.129 | 0.22±0.129   | 23.6188 |
|                 | 0.7280±0.0018   |               | 0.17±0.129 |              |         |
|                 | 0.7294±0.0018   |               |            |              |         |
| <b>Sample</b>   | 0.7171±0.0050   | 0.7192±0.0050 | 0.24±0.129 |              |         |
|                 | 0.7211±0.0050   |               |            |              |         |
|                 | 0.7196±0.0050   |               |            |              |         |
| <b>pH = 2.5</b> |                 |               |            |              |         |
| <b>Blank</b>    | 0.8558±0.0172   | 0.8637±0.0172 | 2.23±0.238 | 2.33±0.238   | 4.1277  |
|                 | 0.8687±0.0172   |               | 2.42±0.238 |              |         |
|                 | 0.8668±0.0172   |               |            |              |         |
| <b>Sample</b>   | 0.7849±0.0080   | 0.7886±0.0080 | 2.35±0.238 |              |         |
|                 | 0.7901±0.0080   |               |            |              |         |
|                 | 0.7909±0.0080   |               |            |              |         |
| <b>pH = 3.0</b> |                 |               |            |              |         |
| <b>Blank</b>    | 0.8274±0.0051   | 0.8293±0.0051 | 3.51±0.089 | 3.50±0.089   | 1.0301  |
|                 | 0.8291±0.0051   |               | 3.54±0.089 |              |         |
|                 | 0.8315±0.0051   |               |            |              |         |
| <b>Sample</b>   | 0.6948±0.0076   | 0.6968±0.0076 | 3.47±0.089 |              |         |
|                 | 0.6954±0.0076   |               |            |              |         |
|                 | 0.7004±0.0076   |               |            |              |         |
| <b>pH = 3.5</b> |                 |               |            |              |         |
| <b>Blank</b>    | 0.7078±0.0051   | 0.7085±0.0051 | 2.97±0.209 | 2.92±0.209   | 2.8856  |
|                 | 0.7109±0.0051   |               | 2.98±0.209 |              |         |
|                 | 0.7070±0.0051   |               |            |              |         |
| <b>Sample</b>   | 0.5878±0.0059   | 0.5902±0.0059 | 2.83±0.209 |              |         |
|                 | 0.5903±0.0059   |               |            |              |         |
|                 | 0.5926±0.0059   |               |            |              |         |
| <b>pH = 4.0</b> |                 |               |            |              |         |
| <b>Blank</b>    | 0.6450±0.0284   | 0.6582±0.0284 | 1.61±0.589 | 1.88±0.589   | 12.6378 |
|                 | 0.6642±0.0284   |               | 2.00±0.589 |              |         |
|                 | 0.6655±0.0284   |               |            |              |         |
| <b>Sample</b>   | 0.5805±0.0039   | 0.5823±0.0039 |            |              |         |

|                 |               |               |            |            |        |
|-----------------|---------------|---------------|------------|------------|--------|
|                 | 0.5834±0.0039 |               | 2.04±0.589 |            |        |
|                 | 0.5831±0.0039 |               |            |            |        |
| <b>pH = 4.5</b> |               |               |            |            |        |
| <b>Blank</b>    | 0.7286±0.0022 | 0.7286±0.0022 | 1.40±0.127 | 1.36±0.127 | 3.7851 |
|                 | 0.7296±0.0022 |               |            |            |        |
|                 | 0.7278±0.0022 |               | 1.37±0.127 |            |        |
| <b>Sample</b>   | 0.6720±0.0043 | 0.6738±0.0043 |            |            |        |
|                 | 0.6742±0.0043 |               | 1.30±0.127 |            |        |
|                 | 0.6754±0.0043 |               |            |            |        |
| <b>pH = 5.0</b> |               |               |            |            |        |
| <b>Blank</b>    | 0.6934±0.0025 | 0.6924±0.0025 | 1.39±0.250 | 1.28±0.250 | 7.8708 |
|                 | 0.6914±0.0025 |               |            |            |        |
|                 | 0.6926±0.0025 |               | 1.27±0.250 |            |        |
| <b>Sample</b>   | 0.6372±0.0092 | 0.6406±0.0092 |            |            |        |
|                 | 0.6401±0.0092 |               | 1.19±0.250 |            |        |
|                 | 0.6446±0.0092 |               |            |            |        |

**Table S8.** Fisher statistical of pH buffer solution

|                 | Titration  |            | S <sup>2</sup>        | UV-Vis     |            | S <sup>2</sup>        | F     |
|-----------------|------------|------------|-----------------------|------------|------------|-----------------------|-------|
|                 | mmol       | Average x  |                       | mmol       | Average x  |                       |       |
| <b>pH = 2</b>   |            |            |                       |            |            |                       |       |
| (1)             | 0.40±0.035 | 0.45±0.124 | 2.5x10 <sup>-3</sup>  | 0.27±0.129 | 0.22±0.129 | 2.7x10 <sup>-3</sup>  | 1.08  |
| (2)             | 0.50±0.035 |            |                       | 0.17±0.129 |            |                       |       |
| (3)             | 0.45±0.035 |            |                       | 0.24±0.129 |            |                       |       |
| <b>pH = 2.5</b> |            |            |                       |            |            |                       |       |
| (1)             | 3.00±0.124 | 3.00±0.124 | 2.5x10 <sup>-3</sup>  | 2.23±0.238 | 2.33±0.238 | 9.25x10 <sup>-3</sup> | 3.7   |
| (2)             | 3.05±0.124 |            |                       | 2.42±0.238 |            |                       |       |
| (3)             | 2.90±0.124 |            |                       | 2.35±0.238 |            |                       |       |
| <b>pH = 3.0</b> |            |            |                       |            |            |                       |       |
| (1)             | 4.05±0.072 | 4.02±0.072 | 8.5x10 <sup>-4</sup>  | 3.51±0.089 | 3.50±0.089 | 1.3x10 <sup>-3</sup>  | 1.53  |
| (2)             | 4.00±0.072 |            |                       | 3.54±0.089 |            |                       |       |
| (3)             | 4.00±0.072 |            |                       | 3.47±0.089 |            |                       |       |
| <b>pH = 3.5</b> |            |            |                       |            |            |                       |       |
| (1)             | 2.00±0.189 | 1.98±0.189 | 5.85x10 <sup>-3</sup> | 2.97±0.209 | 2.92±0.209 | 7.1x10 <sup>-3</sup>  | 1.21  |
| (2)             | 1.90±0.189 |            |                       | 2.98±0.209 |            |                       |       |
| (3)             | 2.05±0.189 |            |                       | 2.83±0.209 |            |                       |       |
| <b>pH = 4.0</b> |            |            |                       |            |            |                       |       |
| (1)             | 1.10±0.144 | 1.03±0.144 | 3.35x10 <sup>-3</sup> | 1.61±0.589 | 1.88±0.589 | 0.05645               | 16.85 |
| (2)             | 1.00±0.144 |            |                       | 2.00±0.589 |            |                       |       |
| (3)             | 1.00±0.144 |            |                       | 2.04±0.589 |            |                       |       |
| <b>pH = 4.5</b> |            |            |                       |            |            |                       |       |
| (1)             | 0.95±0.072 | 0.98±0.072 | 8.5x10 <sup>-4</sup>  | 1.40±0.127 | 1.36±0.127 | 2.65x10 <sup>-3</sup> | 3.11  |
| (2)             | 1.00±0.072 |            |                       | 1.37±0.127 |            |                       |       |
| (3)             | 1.00±0.072 |            |                       | 1.30±0.127 |            |                       |       |
| <b>pH = 5.0</b> |            |            |                       |            |            |                       |       |
| (1)             | 0.00±0.215 | 0.05±0.215 | 7.5x10 <sup>-3</sup>  | 1.39±0.250 | 1.28±0.250 | 0.01015               | 1.35  |
| (2)             | 0.00±0.215 |            |                       | 1.27±0.250 |            |                       |       |
| (3)             | 0.15±0.215 |            |                       | 1.19±0.250 |            |                       |       |

**Table S9.** Student statistical of pH buffer solution

| <b>pH</b>                    | <b>Titration</b> | <b>UV-Vis</b> | <b>di</b>          | <b>di-dtb</b> | <b>(di-dtb)<sup>2</sup></b> |
|------------------------------|------------------|---------------|--------------------|---------------|-----------------------------|
| 2.0                          | 0.45             | 0.22          | 0.23               | 0.512857      | 0.263022                    |
| 2.5                          | 3.00             | 2.33          | 0.67               | 0.952857      | 0.907937                    |
| 3.0                          | 4.02             | 3.50          | 0.52               | 0.802857      | 0.64458                     |
| 3.5                          | 1.98             | 2.92          | -0.94              | -0.65714      | 0.431837                    |
| 4.0                          | 1.03             | 1.88          | -0.85              | -0.56714      | 0.321651                    |
| 4.5                          | 0.98             | 1.36          | -0.38              | -0.09714      | 0.009437                    |
| 5.0                          | 0.05             | 1.28          | -1.23              | -0.94714      | 0.89708                     |
|                              |                  |               | <b>dtb = -0.28</b> |               | <b>Total= 3.475543</b>      |
| <b>s<sub>d</sub> = 0.761</b> |                  |               |                    |               |                             |
| <b>t = 0.9734</b>            |                  |               |                    |               |                             |

**Table S10.** ANOVA two-factor with replication of pH buffer solution

| Anova: Two-Factor With Replication |          |          |          |          |          |          |          |          |
|------------------------------------|----------|----------|----------|----------|----------|----------|----------|----------|
|                                    | 2        | 2.5      | 3        | 3.5      | 4        | 4.5      | 5        | Total    |
| SUMMARY                            | 2        | 2.5      | 3        | 3.5      | 4        | 4.5      | 5        | Total    |
| Count                              | 3        | 3        | 3        | 3        | 3        | 3        | 3        | 21       |
| Sum                                | 1.35     | 8.95     | 12.05    | 5.95     | 3.1      | 2.95     | 0.15     | 34.5     |
| Average                            | 0.45     | 2.983333 | 4.016667 | 1.983333 | 1.033333 | 0.983333 | 0.05     | 1.642857 |
| Variance                           | 0.0025   | 0.005833 | 0.000833 | 0.005833 | 0.003333 | 0.000833 | 0.0075   | 1.849821 |
|                                    |          |          |          |          |          |          |          |          |
| Count                              | 3        | 3        | 3        | 3        | 3        | 3        | 3        | 21       |
| Sum                                | 0.68     | 7        | 10.52    | 8.78     | 5.65     | 4.07     | 3.85     | 40.55    |
| Average                            | 0.226667 | 2.333333 | 3.506667 | 2.926667 | 1.883333 | 1.356667 | 1.283333 | 1.930952 |
| Variance                           | 0.002633 | 0.009233 | 0.001233 | 0.007033 | 0.056433 | 0.002633 | 0.010133 | 1.102779 |
|                                    |          |          |          |          |          |          |          |          |
| <i>Total</i>                       |          |          |          |          |          |          |          |          |
| Count                              | 6        | 6        | 6        | 6        | 6        | 6        | 6        |          |
| Sum                                | 2.03     | 15.95    | 22.57    | 14.73    | 8.75     | 7.02     | 4        |          |
| Average                            | 0.338333 | 2.658333 | 3.761667 | 2.455    | 1.458333 | 1.17     | 0.666667 |          |
| Variance                           | 0.017017 | 0.132777 | 0.078857 | 0.27211  | 0.240657 | 0.0432   | 0.463387 |          |

| ANOVA                 |          |    |          |         |          |          |
|-----------------------|----------|----|----------|---------|----------|----------|
| Soruce                | SS       | df | MS       | F       | P-value  | F crit   |
| <b>Method (A)</b>     | 0.871488 | 1  | 0.871488 | 1.0517  | 5.5E-11  | 4.195972 |
| <b>pH (B)</b>         | 53.68348 | 6  | 8.947247 | 1079.84 | 8.88E-32 | 2.445259 |
| <b>Interaction AB</b> | 5.136529 | 6  | 0.856088 | 103.321 | 8.76E-18 | 2.445259 |
| <b>Error</b>          | 0.232    | 28 | 0.008286 |         |          |          |
| <b>Total</b>          | 59.9235  | 41 |          |         |          |          |

**Table S11.** Error in titration method of oxidized time

|               | Na <sub>2</sub> S <sub>2</sub> O <sub>3</sub> Volume | Average V  | mmol CHO   | Average mmol | CV     |            |
|---------------|------------------------------------------------------|------------|------------|--------------|--------|------------|
| <b>t = 4h</b> |                                                      |            |            |              |        |            |
| <b>Blank</b>  | 1.80±0.124                                           | 1.75±0.124 | 0.10±0.072 | 0.08±0.072   | 13.644 |            |
|               | 1.70±0.124                                           |            |            |              |        |            |
|               | 1.75±0.124                                           |            | 0.10±0.072 |              |        |            |
| <b>Sample</b> | 1.70±0.143                                           | 1.67±0.143 |            |              |        | 0.05±0.072 |
|               | 1.60±0.143                                           |            |            |              |        |            |
|               | 1.70±0.143                                           |            |            |              |        |            |
| <b>t = 5h</b> |                                                      |            |            |              |        |            |
| <b>Blank</b>  | 1.70±0.880                                           | 1.72±0.880 | 0.90±0.144 | 0.96±0.144   | 6.074  |            |
|               | 1.70±0.880                                           |            | 1.00±0.144 |              |        |            |
|               | 1.75±0.880                                           |            |            |              |        |            |
| <b>Sample</b> | 1.60±0.072                                           | 1.58±0.072 | 1.00±0.144 |              |        |            |
|               | 1.60±0.072                                           |            |            |              |        |            |
|               | 1.55±0.072                                           |            |            |              |        |            |
| <b>t = 6h</b> |                                                      |            |            |              |        |            |
| <b>Blank</b>  | 2.00±0.072                                           | 1.98±0.072 | 3.50±0.072 | 3.48±0.072   | 0.8377 |            |
|               | 2.00±0.072                                           |            | 3.50±0.072 |              |        |            |
|               | 1.95±0.072                                           |            |            |              |        |            |
| <b>Sample</b> | 1.60±0.000                                           | 1.60±0.000 | 3.45±0.072 |              |        |            |
|               | 1.60±0.000                                           |            |            |              |        |            |
|               | 1.60±0.000                                           |            |            |              |        |            |
| <b>t = 7h</b> |                                                      |            |            |              |        |            |
| <b>Blank</b>  | 2.20±0.189                                           | 2.12±0.189 | 1.00±0.072 | 1.02±0.072   | 0.5316 |            |
|               | 2.10±0.189                                           |            | 1.00±0.072 |              |        |            |
|               | 2.05±0.189                                           |            |            |              |        |            |
| <b>Sample</b> | 2.10±0.181                                           | 2.03±0.181 | 1.05±0.072 |              |        |            |
|               | 2.00±0.181                                           |            |            |              |        |            |
|               | 2.00±0.181                                           |            |            |              |        |            |
| <b>t = 8h</b> |                                                      |            |            |              |        |            |
| <b>Blank</b>  | 1.75±0.017                                           | 1.75±0.000 | 0.50±0.144 | 0.46±0.144   | 12.676 |            |

|               |            |            |            |            |        |
|---------------|------------|------------|------------|------------|--------|
|               | 1.75±0.017 |            |            |            |        |
|               | 1.75±0.017 |            | 0.50±0.144 |            |        |
| <b>Sample</b> | 1.70±0.017 | 1.70±0.000 |            |            |        |
|               | 1.70±0.017 |            | 0.40±0.144 |            |        |
|               | 1.70±0.017 |            |            |            |        |
| <b>t = 9h</b> |            |            |            |            |        |
| <b>Blank</b>  | 2.00±0.124 | 1.95±0.124 | 0.50±0.143 | 0.43±0.143 | 13.460 |
|               | 1.95±0.124 |            |            |            |        |
|               | 1.90±0.124 |            | 0.40±0.143 |            |        |
| <b>Sample</b> | 1.95±0.124 | 1.90±0.124 |            |            |        |
|               | 1.90±0.124 |            | 0.40±0.143 |            |        |
|               | 1.85±0.124 |            |            |            |        |

**Table S12.** Error in UV-Vis method of oxidized time

|               | Optical density | Average OD    | mmol CHO    | Average mmol | CV     |
|---------------|-----------------|---------------|-------------|--------------|--------|
| <b>t = 4h</b> |                 |               |             |              |        |
| <b>Blank</b>  | 0.6707±0.0095   | 0.6751±0.0095 | 0.25±0.017  | 0.25±0.017   | 2.8284 |
|               | 0.6777±0.0095   |               | 0.25±0.017  |              |        |
|               | 0.6770±0.0095   |               |             |              |        |
| <b>Sample</b> | 0.6259±0.0051   | 0.6236±0.0051 | 0.26±0.017  |              |        |
|               | 0.6228±0.0051   |               |             |              |        |
|               | 0.6220±0.0051   |               |             |              |        |
| <b>t = 5h</b> |                 |               |             |              |        |
| <b>Blank</b>  | 0.8843±0.0169   | 0.8920±0.0169 | 0.51±0.124  | 0.56±0.124   | 8.9285 |
|               | 0.8942±0.0169   |               | 0.59±0.124  |              |        |
|               | 0.8974±0.0169   |               |             |              |        |
| <b>Sample</b> | 0.8065±0.0050   | 0.8076±0.0050 | 0.60±0.1244 |              |        |
|               | 0.8099±0.0050   |               |             |              |        |
|               | 0.8063±0.0050   |               |             |              |        |
| <b>t = 6h</b> |                 |               |             |              |        |
| <b>Blank</b>  | 0.8434±0.0114   | 0.8424±0.0114 | 3.79±0.188  | 3.70±0.188   | 2.049  |
|               | 0.8374±0.0114   |               | 3.65±0.188  |              |        |
|               | 0.8465±0.0114   |               |             |              |        |
| <b>Sample</b> | 0.6902±0.0109   | 0.6952±0.0109 | 3.67±0.188  |              |        |
|               | 0.6975±0.0109   |               |             |              |        |
|               | 0.6981±0.0109   |               |             |              |        |
| <b>t = 7h</b> |                 |               |             |              |        |
| <b>Blank</b>  | 0.7991±0.0051   | 0.8008±0.0051 | 1.92±0.030  | 1.93±0.030   | 0.6345 |
|               | 0.8003±0.0051   |               | 1.94±0.030  |              |        |
|               | 0.8031±0.0051   |               |             |              |        |
| <b>Sample</b> | 0.7216±0.0010   | 0.7219±0.0010 | 1.94±0.030  |              |        |
|               | 0.7218±0.0010   |               |             |              |        |
|               | 0.7224±0.0010   |               |             |              |        |
| <b>t = 8h</b> |                 |               |             |              |        |
| <b>Blank</b>  | 0.8087±0.0162   | 0.8080±0.0162 | 0.51±0.096  | 0.39±0.096   | 9.9307 |



|               |               |               |            |            |        |
|---------------|---------------|---------------|------------|------------|--------|
|               | 0.8011±0.0162 |               |            |            |        |
|               | 0.8141±0.0162 |               | 0.30±0.096 |            |        |
| <b>Sample</b> | 0.7876±0.0034 | 0.7874±0.0034 | 0.37±0.096 |            |        |
|               | 0.7859±0.0034 |               |            |            |        |
|               | 0.7886±0.0034 |               |            |            |        |
| <b>t = 9h</b> |               |               |            |            |        |
| <b>Blank</b>  | 0.8238±0.0016 | 0.8245±0.0016 | 0.00±0.175 | 0.08±0.175 | 8.8388 |
|               | 0.8315±0.0016 |               | 0.17±0.175 |            |        |
|               | 0.8183±0.0016 |               |            |            |        |
| <b>Sample</b> | 0.8238±0.0271 | 0.8147±0.0271 | 0.08±0.175 |            |        |
|               | 0.8178±0.0271 |               |            |            |        |
|               | 0.8026±0.0271 |               |            |            |        |

**Table S13.** Fisher statistical of oxidized time

|               | Titration  |            | S <sup>2</sup>        | UV-Vis     |            | S <sup>2</sup>        | F    |
|---------------|------------|------------|-----------------------|------------|------------|-----------------------|------|
|               | mmol       | Average x  |                       | mmol       | Average x  |                       |      |
| <b>t = 4h</b> |            |            |                       |            |            |                       |      |
| (1)           | 0.10±0.072 | 0.08±0.072 | 8.5x10 <sup>-4</sup>  | 0.25±0.017 | 0.25±0.017 | 5x10 <sup>-5</sup>    | 17   |
| (2)           | 0.10±0.072 |            |                       | 0.25±0.017 |            |                       |      |
| (3)           | 0.05±0.072 |            |                       | 0.26±0.017 |            |                       |      |
| <b>t = 5h</b> |            |            |                       |            |            |                       |      |
| (1)           | 0.90±0.144 | 0.96±0.144 | 3.4x10 <sup>-4</sup>  | 0.51±0.265 | 0.56±0.265 | 2.5x10 <sup>-3</sup>  | 7.35 |
| (2)           | 1.00±0.144 |            |                       | 0.59±0.265 |            |                       |      |
| (3)           | 1.00±0.144 |            |                       | 0.60±0.265 |            |                       |      |
| <b>t = 6h</b> |            |            |                       |            |            |                       |      |
| (1)           | 3.50±0.072 | 3.48±0.072 | 8.5x10 <sup>-4</sup>  | 3.79±0.188 | 3.70±0.188 | 5.75x10 <sup>-3</sup> | 6.76 |
| (2)           | 3.50±0.072 |            |                       | 3.65±0.188 |            |                       |      |
| (3)           | 3.45±0.072 |            |                       | 3.67±0.188 |            |                       |      |
| <b>t = 7h</b> |            |            |                       |            |            |                       |      |
| (1)           | 1.00±0.072 | 1.02±0.072 | 8.5x10 <sup>-4</sup>  | 1.92±0.030 | 1.93±0.030 | 1.5x10 <sup>-4</sup>  | 5.66 |
| (2)           | 1.00±0.072 |            |                       | 1.94±0.030 |            |                       |      |
| (3)           | 1.05±0.072 |            |                       | 1.94±0.030 |            |                       |      |
| <b>t = 8h</b> |            |            |                       |            |            |                       |      |
| (1)           | 0.50±0.035 | 0.46±0.144 | 3.4x10 <sup>-3</sup>  | 0.31±0.096 | 0.32±0.096 | 1.5x10 <sup>-3</sup>  | 2.26 |
| (2)           | 0.50±0.035 |            |                       | 0.30±0.096 |            |                       |      |
| (3)           | 0.40±0.035 |            |                       | 0.37±0.096 |            |                       |      |
| <b>t = 9h</b> |            |            |                       |            |            |                       |      |
| (1)           | 0.50±0.143 | 0.43±0.143 | 3.35x10 <sup>-3</sup> | 0.00±0.175 | 0.08±0.175 | 7.25x10 <sup>-3</sup> | 2.16 |
| (2)           | 0.40±0.143 |            |                       | 0.17±0.175 |            |                       |      |
| (3)           | 0.40±0.143 |            |                       | 0.08±0.175 |            |                       |      |

**Table S14.** Student statistical of oxidized time

| <b>Time(h)</b>                   | <b>Titration</b> | <b>UV-Vis</b> | <b><math>d_i</math></b>               | <b><math>d_i - d_{tb}</math></b> | <b><math>(d_i - d_{tb})^2</math></b> |
|----------------------------------|------------------|---------------|---------------------------------------|----------------------------------|--------------------------------------|
| 4                                | 0.08             | 0.25          | -0.17                                 | -0.10167                         | 0.010336                             |
| 5                                | 0.96             | 0.56          | 0.4                                   | 0.468333                         | 0.219336                             |
| 6                                | 3.48             | 3.7           | -0.22                                 | -0.15167                         | 0.023003                             |
| 7                                | 1.02             | 1.93          | -0.91                                 | -0.84167                         | 0.708403                             |
| 8                                | 0.46             | 0.32          | 0.14                                  | 0.208333                         | 0.043403                             |
| 9                                | 0.43             | 0.08          | 0.35                                  | 0.418333                         | 0.175003                             |
|                                  |                  |               | <b><math>d_{tb} = -0.06833</math></b> |                                  | <b>Total = 1.179483</b>              |
| <b><math>s_d = 0.4857</math></b> |                  |               |                                       |                                  |                                      |
| <b><math>t = 0.3446</math></b>   |                  |               |                                       |                                  |                                      |

**Table S15.** ANOVA two-factor with replication

| Anova: Two-Factor With Replication |          |          |          |          |          |          |          |
|------------------------------------|----------|----------|----------|----------|----------|----------|----------|
| SUMMARY                            | 4        | 5        | 6        | 7        | 8        | 9        | Total    |
| Count                              | 3        | 3        | 3        | 3        | 3        | 3        | 18       |
| Sum                                | 0.25     | 2.9      | 10.45    | 3.05     | 1.4      | 1.3      | 19.35    |
| Average                            | 0.083333 | 0.966667 | 3.483333 | 1.016667 | 0.466667 | 0.433333 | 1.075    |
| Variance                           | 0.000833 | 0.003333 | 0.000833 | 0.000833 | 0.003333 | 0.003333 | 1.339191 |
|                                    |          |          |          |          |          |          |          |
| Count                              | 3        | 3        | 3        | 3        | 3        | 3        | 18       |
| Sum                                | 0.76     | 1.7      | 11.11    | 5.8      | 0.98     | 0.25     | 20.6     |
| Average                            | 0.253333 | 0.566667 | 3.703333 | 1.933333 | 0.326667 | 0.083333 | 1.144444 |
| Variance                           | 3.33E-05 | 0.002433 | 0.005733 | 0.000133 | 0.001433 | 0.007233 | 1.783097 |
|                                    |          |          |          |          |          |          |          |
| <i>Total</i>                       |          |          |          |          |          |          |          |
| Count                              | 6        | 6        | 6        | 6        | 6        | 6        |          |
| Sum                                | 1.01     | 4.6      | 21.56    | 8.85     | 2.38     | 1.55     |          |
| Average                            | 0.168333 | 0.766667 | 3.593333 | 1.475    | 0.396667 | 0.258333 |          |
| Variance                           | 0.009017 | 0.050307 | 0.017147 | 0.25247  | 0.007787 | 0.040977 |          |

| <b>ANOVA</b>          |           |           |           |          |                |               |
|-----------------------|-----------|-----------|-----------|----------|----------------|---------------|
| <b>Source</b>         | <b>SS</b> | <b>df</b> | <b>MS</b> | <b>F</b> | <b>P-value</b> | <b>F crit</b> |
| <b>Method (A)</b>     | 0.043403  | 1         | 0.043403  | 1.765537 | 0.000316       | 4.259677      |
| <b>Time (B)</b>       | 51.23378  | 5         | 10.24676  | 4168.172 | 1.94E-34       | 2.620654      |
| <b>Interaction AB</b> | 1.786114  | 5         | 0.357223  | 1.45311  | 3.96E-17       | 2.620654      |
| <b>Error</b>          | 0.059     | 24        | 0.002458  |          |                |               |
| <b>Total</b>          | 53.1223   | 35        |           |          |                |               |

**Table S16.** Error in titration method of oxidized temperature

|                 | Na <sub>2</sub> S <sub>2</sub> O <sub>3</sub> Volume | Average V  | mmol CHO   | Average mmol | CV      |
|-----------------|------------------------------------------------------|------------|------------|--------------|---------|
| <b>T = 25°C</b> |                                                      |            |            |              |         |
| <b>Blank</b>    | 3.00±0.144                                           | 3.06±0.144 | 0.40±0.144 | 0.46±0.144   | 12.6759 |
|                 | 3.10±0.144                                           |            | 0.50±0.144 |              |         |
|                 | 3.10±0.144                                           |            |            |              |         |
| <b>Sample</b>   | 3.05±0.000                                           | 3.05±0.000 | 0.50±0.144 | 0.46±0.144   | 12.6759 |
|                 | 3.05±0.000                                           |            |            |              |         |
|                 | 3.05±0.000                                           |            |            |              |         |
| <b>T = 35°C</b> |                                                      |            |            |              |         |
| <b>Blank</b>    | 3.35±0.190                                           | 3.26±0.190 | 0.50±0.072 | 0.52±0.072   | 5.6066  |
|                 | 3.25±0.190                                           |            | 0.50±0.072 |              |         |
|                 | 3.20±0.190                                           |            |            |              |         |
| <b>Sample</b>   | 3.30±0.189                                           | 3.22±0.189 | 0.55±0.072 | 0.52±0.072   | 5.6066  |
|                 | 3.20±0.189                                           |            |            |              |         |
|                 | 3.15±0.189                                           |            |            |              |         |
| <b>T = 45°C</b> |                                                      |            |            |              |         |
| <b>Blank</b>    | 4.10±0.072                                           | 4.12±0.072 | 8.50±0.144 | 8.53±0.144   | 0.6785  |
|                 | 4.15±0.072                                           |            | 8.60±0.144 |              |         |
|                 | 4.10±0.072                                           |            |            |              |         |
| <b>Sample</b>   | 3.35±0.072                                           | 3.33±0.072 | 8.50±0.144 | 8.53±0.144   | 0.6785  |
|                 | 3.30±0.072                                           |            |            |              |         |
|                 | 3.35±0.072                                           |            |            |              |         |
| <b>T = 55°C</b> |                                                      |            |            |              |         |
| <b>Blank</b>    | 3.00±0.072                                           | 2.98±0.072 | 1.50±0.072 | 1.48±0.072   | 18.1780 |
|                 | 2.95±0.072                                           |            | 1.45±0.072 |              |         |
|                 | 3.00±0.072                                           |            |            |              |         |
| <b>Sample</b>   | 2.85±0.072                                           | 2.83±0.072 | 1.50±0.072 | 1.48±0.072   | 18.1780 |
|                 | 2.80±0.072                                           |            |            |              |         |
|                 | 2.85±0.072                                           |            |            |              |         |
| <b>T = 65°C</b> |                                                      |            |            |              |         |
| <b>Blank</b>    | 3.40±0.124                                           | 3.35±0.124 | 1.00±0.144 | 0.93±0.144   | 6.2235  |

|               |            |            |            |  |  |
|---------------|------------|------------|------------|--|--|
|               | 3.35±0.124 |            |            |  |  |
|               | 3.30±0.124 |            | 0.90±0.144 |  |  |
| <b>Sample</b> | 3.30±0.144 | 3.26±0.144 |            |  |  |
|               | 3.30±0.144 |            | 0.90±0.144 |  |  |
|               | 3.20±0.144 |            |            |  |  |

**Table S17.** Error in UV-Vis method of oxidized temperature

|                 | Optical density | Average OD    | mmol CHO   | Average mmol | CV      |
|-----------------|-----------------|---------------|------------|--------------|---------|
| <b>T = 25°C</b> |                 |               |            |              |         |
| <b>Blank</b>    | 0.6196±0.0015   | 0.6194±0.0015 | 0.43±0.174 | 0.36±0.174   | 19.5434 |
|                 | 0.6188±0.0015   |               | 0.29±0.174 |              |         |
|                 | 0.6200±0.0015   |               |            |              |         |
| <b>Sample</b>   | 0.6021±0.0062   | 0.6049±0.0062 | 0.35±0.174 |              |         |
|                 | 0.6069±0.0062   |               |            |              |         |
|                 | 0.6058±0.0062   |               |            |              |         |
| <b>T = 35°C</b> |                 |               |            |              |         |
| <b>Blank</b>    | 0.7392±0.0180   | 0.7476±0.0180 | 0.43±0.063 | 0.45±0.063   | 5.6655  |
|                 | 0.7514±0.0180   |               | 0.45±0.063 |              |         |
|                 | 0.7521±0.0180   |               |            |              |         |
| <b>Sample</b>   | 0.7204±0.0181   | 0.7288±0.0181 | 0.48±0.063 |              |         |
|                 | 0.7334±0.0181   |               |            |              |         |
|                 | 0.7327±0.0181   |               |            |              |         |
| <b>T = 45°C</b> |                 |               |            |              |         |
| <b>Blank</b>    | 0.8241±0.0002   | 0.8242±0.0002 | 8.04±0.353 | 8.20±0.353   | 1.7354  |
|                 | 0.8242±0.0002   |               | 8.27±0.353 |              |         |
|                 | 0.8242±0.0002   |               |            |              |         |
| <b>Sample</b>   | 0.4993±0.0141   | 0.4928±0.0141 | 8.30±0.353 |              |         |
|                 | 0.4900±0.0141   |               |            |              |         |
|                 | 0.4890±0.0141   |               |            |              |         |
| <b>T = 55°C</b> |                 |               |            |              |         |
| <b>Blank</b>    | 0.7081±0.0142   | 0.7144±0.0142 | 1.31±0.089 | 1.34±0.089   | 2.6907  |
|                 | 0.7156±0.0142   |               | 1.33±0.089 |              |         |
|                 | 0.7194±0.0142   |               |            |              |         |
| <b>Sample</b>   | 0.6590±0.0018   | 0.6586±0.0018 | 1.38±0.089 |              |         |
|                 | 0.6577±0.0018   |               |            |              |         |
|                 | 0.6590±0.0018   |               |            |              |         |
| <b>T = 65°C</b> |                 |               |            |              |         |
| <b>Blank</b>    | 0.8258±0.0248   | 0.8373±0.0248 | 0.92±0.201 | 1.00±0.201   |         |

|               |               |               |            |  |
|---------------|---------------|---------------|------------|--|
|               | 0.8435±0.0248 |               |            |  |
|               | 0.8427±0.0248 |               | 1.02±0.201 |  |
| <b>Sample</b> | 0.7882±0.0181 | 0.7964±0.0181 |            |  |
|               | 0.8021±0.0181 |               | 1.08±0.201 |  |
|               | 0.7990±0.0181 |               |            |  |



**Table S18.** Fisher statistical of oxidized temperature

|                 | Titration  |            | S <sup>2</sup>        | UV-Vis     |            | S <sup>2</sup>        | F    |
|-----------------|------------|------------|-----------------------|------------|------------|-----------------------|------|
|                 | mmol       | Average x  |                       | mmol       | Average x  |                       |      |
| <b>t = 25°C</b> |            |            |                       |            |            |                       |      |
| (1)             | 0.40±0.144 | 0.46±0.144 | 3.4x10 <sup>-3</sup>  | 0.43±0.174 | 0.36±0.174 | 4.95x10 <sup>-3</sup> | 1.45 |
| (2)             | 0.50±0.144 |            |                       | 0.29±0.174 |            |                       |      |
| (3)             | 0.50±0.144 |            |                       | 0.35±0.174 |            |                       |      |
| <b>T = 35°C</b> |            |            |                       |            |            |                       |      |
| (1)             | 0.50±0.072 | 0.52±0.072 | 8.5x10 <sup>-4</sup>  | 0.43±0.063 | 0.45±0.063 | 6.5x10 <sup>-4</sup>  | 1.30 |
| (2)             | 0.50±0.072 |            |                       | 0.45±0.063 |            |                       |      |
| (3)             | 0.55±0.072 |            |                       | 0.48±0.063 |            |                       |      |
| <b>T = 45°C</b> |            |            |                       |            |            |                       |      |
| (1)             | 8.50±0.144 | 8.53±0.144 | 3.35x10 <sup>-3</sup> | 8.04±0.017 | 8.20±0.353 | 0.02025               | 6.04 |
| (2)             | 8.60±0.144 |            |                       | 8.27±0.017 |            |                       |      |
| (3)             | 8.50±0.144 |            |                       | 8.30±0.017 |            |                       |      |
| <b>T = 55°C</b> |            |            |                       |            |            |                       |      |
| (1)             | 1.50±0.072 | 1.48±0.072 | 8.5x10 <sup>-4</sup>  | 1.31±0.089 | 1.34±0.089 | 1.3x10 <sup>-3</sup>  | 1.53 |
| (2)             | 1.45±0.072 |            |                       | 1.33±0.089 |            |                       |      |
| (3)             | 1.50±0.072 |            |                       | 1.38±0.089 |            |                       |      |
| <b>T = 65°C</b> |            |            |                       |            |            |                       |      |
| (1)             | 1.00±0.144 | 0.93±0.144 | 3.35x10 <sup>-3</sup> | 0.92±0.201 | 1.00±0.201 | 6.6x10 <sup>-3</sup>  | 1.97 |
| (2)             | 0.90±0.144 |            |                       | 1.02±0.201 |            |                       |      |
| (3)             | 0.90±0.144 |            |                       | 1.08±0.201 |            |                       |      |

**Table S19.** Student statistical of oxidized temperature

| <b>Temperature</b>             | <b>Titration</b> | <b>UV-Vis</b> | <b>di</b>                     | <b>di-dtb</b> | <b>(di-dtb)<sup>2</sup></b> |
|--------------------------------|------------------|---------------|-------------------------------|---------------|-----------------------------|
| 25                             | 0.46             | 0.36          | 0.1                           | -0.004        | 1.6E-05                     |
| 35                             | 0.52             | 0.5           | 0.02                          | -0.084        | 0.007056                    |
| 45                             | 8.53             | 8.2           | 0.33                          | 0.226         | 0.051076                    |
| 55                             | 1.48             | 1.34          | 0.14                          | 0.036         | 0.001296                    |
| 65                             | 0.93             | 1             | -0.07                         | -0.174        | 0.030276                    |
|                                |                  |               | <b>d<sub>tb</sub> = 0.104</b> |               | <b>Total = 0.08972</b>      |
| <b>s<sub>d</sub> = 0.14976</b> |                  |               |                               |               |                             |
| <b>t = 1.5528</b>              |                  |               |                               |               |                             |

**Table S20.** ANOVA two-factor with replication of oxidized temperature

| Anova: Two-Factor With Replication |          |          |          |          |          |          |
|------------------------------------|----------|----------|----------|----------|----------|----------|
| SUMMARY                            | 25       | 35       | 45       | 55       | 65       | Total    |
| Count                              | 3        | 3        | 3        | 3        | 3        | 15       |
| Sum                                | 1.4      | 1.55     | 25.6     | 4.45     | 2.8      | 35.8     |
| Average                            | 0.466667 | 0.516667 | 8.533333 | 1.483333 | 0.933333 | 2.386667 |
| Variance                           | 0.003333 | 0.000833 | 0.003333 | 0.000833 | 0.003333 | 10.26445 |
| Count                              | 3        | 3        | 3        | 3        | 3        | 15       |
| Sum                                | 1.07     | 1.36     | 24.61    | 4.02     | 3.02     | 34.08    |
| Average                            | 0.356667 | 0.453333 | 8.203333 | 1.34     | 1.006667 | 2.272    |
| Variance                           | 0.004933 | 0.000633 | 0.020233 | 0.0013   | 0.006533 | 9.567617 |
| <i>Total</i>                       |          |          |          |          |          |          |
| Count                              | 6        | 6        | 6        | 6        | 6        |          |
| Sum                                | 2.47     | 2.91     | 50.21    | 8.47     | 5.82     |          |
| Average                            | 0.411667 | 0.485    | 8.368333 | 1.411667 | 0.97     |          |
| Variance                           | 0.006937 | 0.00179  | 0.042097 | 0.007017 | 0.00556  |          |

| ANOVA                  |          |    |          |          |          |          |
|------------------------|----------|----|----------|----------|----------|----------|
| Source                 | SS       | df | MS       | F        | P-value  | F crit   |
| <b>Method (A)</b>      | 0.098613 | 1  | 0.098613 | 2.176895 | 0.000149 | 4.351244 |
| <b>Temperature (B)</b> | 277.4306 | 4  | 69.35765 | 15310.74 | 1.51E-34 | 2.866081 |
| <b>Interaction AB</b>  | 0.127787 | 4  | 0.031947 | 0.752244 | 0.001035 | 2.866081 |
| <b>Error</b>           | 0.0906   | 20 | 0.00453  |          |          |          |
| <b>Total</b>           | 277.7476 | 29 |          |          |          |          |

**Table S21.**Error in titration method of mass ratio TCR:KIO<sub>4</sub>

|               | Na <sub>2</sub> S <sub>2</sub> O <sub>3</sub> Volume | Average V   | mmol CHO    | Average mmol | CV      |
|---------------|------------------------------------------------------|-------------|-------------|--------------|---------|
| <b>1:1</b>    |                                                      |             |             |              |         |
| <b>Blank</b>  | 3.50±0.072                                           | 3.48±0.072  | 0.50±0.144  | 0.46±0.144   | 12.6759 |
|               | 3.50±0.072                                           |             |             |              |         |
|               | 3.45±0.072                                           |             |             |              |         |
| <b>Sample</b> | 3.45±0.072                                           | 3.43±0.072  | 0.50±0.144  | 0.46±0.144   | 12.6759 |
|               | 3.45±0.072                                           |             |             |              |         |
|               | 3.40±0.072                                           |             |             |              |         |
| <b>1:2</b>    |                                                      |             |             |              |         |
| <b>Blank</b>  | 6.10±0.072                                           | 6.12±0.072  | 0.50±0.072  | 0.52±0.072   | 5.6066  |
|               | 6.15±0.072                                           |             |             |              |         |
|               | 6.10±0.072                                           |             |             |              |         |
| <b>Sample</b> | 6.05±0.124                                           | 6.05±0.124  | 0.50±0.072  | 0.52±0.072   | 5.6066  |
|               | 6.10±0.124                                           |             |             |              |         |
|               | 6.00±0.124                                           |             |             |              |         |
| <b>1:4</b>    |                                                      |             |             |              |         |
| <b>Blank</b>  | 12.20±0.144                                          | 12.16±0.144 | 5.00±0.143  | 5.03±0.143   | 1.1506  |
|               | 12.10±0.144                                          |             |             |              |         |
|               | 12.20±0.144                                          |             |             |              |         |
| <b>Sample</b> | 11.70±0.124                                          | 11.65±0.124 | 5.00±0.143  | 5.03±0.143   | 1.1506  |
|               | 11.60±0.124                                          |             |             |              |         |
|               | 11.65±0.124                                          |             |             |              |         |
| <b>1:6</b>    |                                                      |             |             |              |         |
| <b>Blank</b>  | 12.40±0.144                                          | 12.33±0.144 | 15.00±0.072 | 15.02±0.072  | 0.1941  |
|               | 12.30±0.144                                          |             |             |              |         |
|               | 12.30±0.14                                           |             |             |              |         |
| <b>Sample</b> | 10.90±0.189                                          | 10.82±0.189 | 15.00±0.072 | 15.02±0.072  | 0.1941  |
|               | 10.80±0.189                                          |             |             |              |         |
|               | 10.75±0.189                                          |             |             |              |         |
| <b>1:8</b>    |                                                      |             |             |              |         |
| <b>Blank</b>  | 20.00±0.144                                          | 19.93±0.144 | 50.00±0.124 | 49.95±0.124  | 0.1000  |

|               |             |             |             |             |        |
|---------------|-------------|-------------|-------------|-------------|--------|
|               | 19.90±0.144 |             |             |             |        |
|               | 19.90±0.144 |             | 49.90±0.124 |             |        |
| <b>Sample</b> | 15.00±0.072 | 15.02±0.072 | 49.95±0.124 | 10.96±0.144 | 0.5320 |
|               | 15.00±0.072 |             |             |             |        |
|               | 15.05±0.072 |             |             |             |        |
| <b>1:10</b>   |             |             |             |             |        |
| <b>Blank</b>  | 27.05±0.124 | 27.05±0.124 | 10.90±0.144 | 10.96±0.144 | 0.5320 |
|               | 27.00±0.124 |             | 11.00±0.144 |             |        |
|               | 27.10±0.124 |             |             |             |        |
| <b>Sample</b> | 26.10±0.144 | 26.03±0.144 | 11.00±0.144 | 10.96±0.144 | 0.5320 |
|               | 26.00±0.144 |             |             |             |        |
|               | 26.00±0.144 |             |             |             |        |
| <b>1:12</b>   |             |             |             |             |        |
| <b>Blank</b>  | 28.00±0.144 | 28.06±0.144 | 9.90±0.144  | 9.96±0.144  | 0.5854 |
|               | 28.10±0.144 |             | 10.00±0.144 |             |        |
|               | 28.10±0.144 |             |             |             |        |
| <b>Sample</b> | 27.20±0.144 | 27.13±0.144 | 10.00±0.144 | 9.96±0.144  | 0.5854 |
|               | 27.10±0.144 |             |             |             |        |
|               | 27.10±0.144 |             |             |             |        |

**Table S22.** Error in UV-Vis method of mass ratio TCR:KIO<sub>4</sub>

|               | Optical density | Average OD    | mmol CHO    | Average mmol | CV      |
|---------------|-----------------|---------------|-------------|--------------|---------|
| <b>1:1</b>    |                 |               |             |              |         |
| <b>Blank</b>  | 0.5060±0.0042   | 0.5079±0.0042 | 0.33±0.112  | 0.38±0.112   | 11.9149 |
|               | 0.5093±0.0042   |               | 0.42±0.112  |              |         |
|               | 0.5085±0.0042   |               |             |              |         |
| <b>Sample</b> | 0.4926±0.0010   | 0.4927±0.0010 | 0.38±0.112  |              |         |
|               | 0.4924±0.0010   |               |             |              |         |
|               | 0.4932±0.0010   |               |             |              |         |
| <b>1:2</b>    |                 |               |             |              |         |
| <b>Blank</b>  | 0.3891±0.0002   | 0.3890±0.0002 | 0.63±0.039  | 0.61±0.039   | 2.5920  |
|               | 0.3891±0.0002   |               | 0.61±0.039  |              |         |
|               | 0.3890±0.0002   |               |             |              |         |
| <b>Sample</b> | 0.3636±0.0016   | 0.3643±0.0016 | 0.60±0.039  |              |         |
|               | 0.3645±0.0016   |               |             |              |         |
|               | 0.3649±0.0016   |               |             |              |         |
| <b>1:4</b>    |                 |               |             |              |         |
| <b>Blank</b>  | 0.8340±0.0119   | 0.8395±0.0119 | 4.88±0.224  | 4.88±0.224   | 1.8556  |
|               | 0.8421±0.0119   |               | 4.98±0.224  |              |         |
|               | 0.8425±0.0119   |               |             |              |         |
| <b>Sample</b> | 0.7680±0.0095   | 0.7658±0.0095 | 4.80±0.224  |              |         |
|               | 0.7614±0.0095   |               |             |              |         |
|               | 0.7681±0.0095   |               |             |              |         |
| <b>1:6</b>    |                 |               |             |              |         |
| <b>Blank</b>  | 0.3531±0.0117   | 0.3585±0.0117 | 18.76±0.113 | 18.75±0.113  | 0.6208  |
|               | 0.3611±0.0117   |               | 18.79±0.113 |              |         |
|               | 0.3615±0.0117   |               |             |              |         |
| <b>Sample</b> | 0.2031±0.0199   | 0.2122±0.0199 | 18.70±0.113 |              |         |
|               | 0.2149±0.0199   |               |             |              |         |
|               | 0.2185±0.0199   |               |             |              |         |
| <b>1:8</b>    |                 |               |             |              |         |
| <b>Blank</b>  | 0.6445±0.0076   | 0.6480±0.0076 | 41.54±0.065 | 41.56±0.065  | 0.0636  |

|               |               |               |             |             |        |
|---------------|---------------|---------------|-------------|-------------|--------|
|               | 0.6497±0.0076 |               |             |             |        |
|               | 0.6499±0.0076 |               | 41.59±0.065 |             |        |
| <b>Sample</b> | 0.3122±0.0109 | 0.3154±0.0109 | 41.57±0.065 | 13.83±0.635 | 1.8498 |
|               | 0.3137±0.0109 |               |             |             |        |
|               | 0.3205±0.0109 |               |             |             |        |
| <b>1:10</b>   |               |               |             |             |        |
| <b>Blank</b>  | 0.5004±0.0106 | 0.5044±0.0106 | 13.87±0.635 | 13.83±0.635 | 1.8498 |
|               | 0.5038±0.0106 |               | 13.56±0.635 |             |        |
|               | 0.5089±0.0106 |               |             |             |        |
| <b>Sample</b> | 0.3883±0.0092 | 0.3926±0.0092 | 14.07±0.635 | 13.83±0.635 | 1.8498 |
|               | 0.3942±0.0092 |               |             |             |        |
|               | 0.3952±0.0092 |               |             |             |        |
| <b>1:12</b>   |               |               |             |             |        |
| <b>Blank</b>  | 0.5034±0.0086 | 0.5044±0.0086 | 6.94±0.200  | 6.85±0.200  | 0.2149 |
|               | 0.5083±0.0086 |               | 6.78±0.200  |             |        |
|               | 0.5016±0.0086 |               |             |             |        |
| <b>Sample</b> | 0.4473±0.0083 | 0.4512±0.0083 | 6.84±0.200  | 6.85±0.200  | 0.2149 |
|               | 0.4535±0.0083 |               |             |             |        |
|               | 0.4527±0.0083 |               |             |             |        |

**Table S23.** Fisher statistical of mass ratio TCR:KIO<sub>4</sub>

|             | Titration   |             | S <sup>2</sup>        | UV-Vis      |             | S <sup>2</sup>        | F     |
|-------------|-------------|-------------|-----------------------|-------------|-------------|-----------------------|-------|
|             | mmol        | Average x   |                       | mmol        | Average x   |                       |       |
| <b>1:1</b>  |             |             |                       |             |             |                       |       |
| (1)         | 0.50±0.144  | 0.46±0.144  | 3.4x10 <sup>-3</sup>  | 0.33±0.112  | 0.38±0.112  | 2.05x10 <sup>-3</sup> | 1.35  |
| (2)         | 0.50±0.144  |             |                       | 0.42±0.112  |             |                       |       |
| (3)         | 0.40±0.144  |             |                       | 0.38±0.112  |             |                       |       |
| <b>1:2</b>  |             |             |                       |             |             |                       |       |
| (1)         | 0.50±0.072  | 0.52±0.072  | 8.5x10 <sup>-4</sup>  | 0.63±0.039  | 0.61±0.039  | 2.5x10 <sup>-4</sup>  | 3.4   |
| (2)         | 0.50±0.072  |             |                       | 0.61±0.039  |             |                       |       |
| (3)         | 0.55±0.072  |             |                       | 0.60±0.039  |             |                       |       |
| <b>1:4</b>  |             |             |                       |             |             |                       |       |
| (1)         | 5.00±0.143  | 5.03±0.143  | 3.35x10 <sup>-3</sup> | 4.88±0.224  | 4.88±0.224  | 8.2x10 <sup>-3</sup>  | 2.44  |
| (2)         | 5.00±0.143  |             |                       | 4.98±0.224  |             |                       |       |
| (3)         | 5.10±0.143  |             |                       | 4.80±0.224  |             |                       |       |
| <b>1:6</b>  |             |             |                       |             |             |                       |       |
| (1)         | 15.00±0.072 | 15.02±0.072 | 8.5x10 <sup>-4</sup>  | 18.76±0.113 | 18.68±0.113 | 2.1x10 <sup>-3</sup>  | 2.47  |
| (2)         | 15.00±0.072 |             |                       | 18.79±0.113 |             |                       |       |
| (3)         | 15.05±0.072 |             |                       | 18.70±0.113 |             |                       |       |
| <b>1:8</b>  |             |             |                       |             |             |                       |       |
| (1)         | 50.00±0.124 | 49.95±0.124 | 2.5x10 <sup>-3</sup>  | 41.54±0.065 | 41.56±0.065 | 7x10 <sup>-4</sup>    | 3.57  |
| (2)         | 49.90±0.124 |             |                       | 41.59±0.065 |             |                       |       |
| (3)         | 49.95±0.124 |             |                       | 41.57±0.065 |             |                       |       |
| <b>1:10</b> |             |             |                       |             |             |                       |       |
| (1)         | 10.90±0.144 | 10.96±0.144 | 3.4x10 <sup>-3</sup>  | 13.87±0.635 | 13.83±0.635 | 0.06                  | 17.64 |
| (2)         | 11.00±0.144 |             |                       | 13.56±0.635 |             |                       |       |
| (3)         | 11.00±0.144 |             |                       | 14.07±0.635 |             |                       |       |
| <b>1:12</b> |             |             |                       |             |             |                       |       |
| (1)         | 9.90±0.144  | 9.96±0.144  | 3.4x10 <sup>-3</sup>  | 6.94±0.035  | 6.85±0.200  | 6.55x10 <sup>-3</sup> | 1.92  |
| (2)         | 10.00±0.144 |             |                       | 6.78±0.035  |             |                       |       |
| (3)         | 10.00±0.144 |             |                       | 6.84±0.035  |             |                       |       |



**Table S24.** Student statistical of mass ratio TCR:KIO<sub>4</sub>

| <b>Ratio</b>                  | <b>Titration</b> | <b>UV-Vis</b> | <b>d<sub>i</sub></b>         | <b>d<sub>i</sub>-d<sub>tb</sub></b> | <b>(d<sub>i</sub>-d<sub>tb</sub>)<sup>2</sup></b> |
|-------------------------------|------------------|---------------|------------------------------|-------------------------------------|---------------------------------------------------|
| 1:1                           | 0.46             | 0.38          | 0.08                         | -0.65                               | 0.4225                                            |
| 1:2                           | 0.52             | 0.61          | -0.09                        | -0.82                               | 0.6724                                            |
| 1:4                           | 5.03             | 4.88          | 0.15                         | -0.58                               | 0.3364                                            |
| 1:6                           | 15.02            | 18.68         | -3.66                        | -4.39                               | 19.2721                                           |
| 1:8                           | 49.95            | 41.56         | 8.39                         | 7.66                                | 58.6756                                           |
| 1:10                          | 10.96            | 13.83         | -2.87                        | -3.6                                | 12.96                                             |
| 1:12                          | 9.96             | 6.85          | 3.11                         | 2.38                                | 5.6644                                            |
|                               |                  |               | <b>d<sub>tb</sub> = 0.73</b> |                                     | <b>Total = 98.0034</b>                            |
| <b>s<sub>d</sub> = 4.0415</b> |                  |               |                              |                                     |                                                   |
| <b>t = 0.4778</b>             |                  |               |                              |                                     |                                                   |

**Table S25.** ANOVA two-factor with replication of mass ratio TCR:KIO<sub>4</sub>

| Anova: Two-Factor With Replication |          |          |          |          |          |          |          |          |
|------------------------------------|----------|----------|----------|----------|----------|----------|----------|----------|
| SUMMARY                            | 1 1      | 1 2      | 1 4      | 1 6      | 1 8      | 1 10     | 1 12     | Total    |
| Count                              | 3        | 3        | 3        | 3        | 3        | 3        | 3        | 21       |
| Sum                                | 1.5      | 1.55     | 15.1     | 45.05    | 149.85   | 32.9     | 29.9     | 275.85   |
| Average                            | 0.5      | 0.516667 | 5.033333 | 15.01667 | 49.95    | 10.96667 | 9.966667 | 13.13571 |
| Variance                           | 0        | 0.000833 | 0.003333 | 0.000833 | 0.0025   | 0.003333 | 0.003333 | 263.7205 |
|                                    |          |          |          |          |          |          |          |          |
| Count                              | 3        | 3        | 3        | 3        | 3        | 3        | 3        | 21       |
| Sum                                | 1.13     | 1.84     | 14.66    | 56.25    | 124.7    | 41.5     | 20.56    | 260.64   |
| Average                            | 0.376667 | 0.613333 | 4.886667 | 18.75    | 41.56667 | 13.83333 | 6.853333 | 12.41143 |
| Variance                           | 0.002033 | 0.000233 | 0.008133 | 0.0021   | 0.000633 | 0.066033 | 0.006533 | 189.5744 |
|                                    |          |          |          |          |          |          |          |          |
| <i>Total</i>                       |          |          |          |          |          |          |          |          |
| Count                              | 6        | 6        | 6        | 6        | 6        | 6        | 6        |          |
| Sum                                | 2.63     | 3.39     | 29.76    | 101.3    | 274.55   | 74.4     | 50.46    |          |
| Average                            | 0.438333 | 0.565    | 4.96     | 16.88333 | 45.75833 | 12.4     | 8.41     |          |
| Variance                           | 0.005377 | 0.00323  | 0.01104  | 4.182507 | 21.08534 | 2.49308  | 2.9118   |          |

| <b>ANOVA</b>          |           |           |           |          |                |               |
|-----------------------|-----------|-----------|-----------|----------|----------------|---------------|
| <b>Source</b>         | <b>SS</b> | <b>df</b> | <b>MS</b> | <b>F</b> | <b>P-value</b> | <b>F crit</b> |
| <b>Method (A)</b>     | 5.508193  | 1         | 5.508193  | 772.1766 | 6.27E-22       | 4.195972      |
| <b>Mass ratio (B)</b> | 8917.945  | 6         | 1486.324  | 208363.2 | 9.59E-64       | 2.445259      |
| <b>Interaction AB</b> | 147.7539  | 6         | 24.62565  | 3452.194 | 7.99E-39       | 2.445259      |
| <b>Error</b>          | 0.199733  | 28        | 0.007133  |          |                |               |
| <b>Total</b>          | 9071.407  | 41        |           |          |                |               |

**Table S26.** Error in titration method of ionic force

|               | Na <sub>2</sub> S <sub>2</sub> O <sub>3</sub> Volume | Average V   | mmol CHO    | Average mmol | CV     |
|---------------|------------------------------------------------------|-------------|-------------|--------------|--------|
| <b>0.05M</b>  |                                                      |             |             |              |        |
| <b>Blank</b>  | 20.00±0.144                                          | 20.03±0.144 | 10.00±0.144 | 9.96±0.144   | 0.5854 |
|               | 20.10±0.144                                          |             | 10.00±0.144 |              |        |
|               | 20.00±0.144                                          |             |             |              |        |
| <b>Sample</b> | 19.00±0.189                                          | 19.08±0.189 | 9.90±0.144  |              |        |
|               | 19.10±0.189                                          |             | 10.90±0.144 |              |        |
|               | 19.15±0.189                                          |             |             |              |        |
| <b>0.10M</b>  |                                                      |             |             |              |        |
| <b>Blank</b>  | 19.60±0.144                                          | 19.56±0.144 | 11.00±0.144 | 10.96±0.144  | 0.5320 |
|               | 19.60±0.144                                          |             | 11.00±0.144 |              |        |
|               | 19.50±0.144                                          |             |             |              |        |
| <b>Sample</b> | 18.50±0.072                                          | 18.52±0.072 | 10.90±0.144 |              |        |
|               | 18.50±0.071                                          |             | 10.90±0.144 |              |        |
|               | 18.55±0.071                                          |             |             |              |        |
| <b>0.15M</b>  |                                                      |             |             |              |        |
| <b>Blank</b>  | 17.00±0.099                                          | 16.96±0.099 | 10.00±0.144 | 9.93±0.144   | 0.5828 |
|               | 16.90±0.099                                          |             | 9.90±0.144  |              |        |
|               | 17.00±0.099                                          |             |             |              |        |
| <b>Sample</b> | 16.00±0.144                                          | 15.96±0.144 | 9.90±0.144  |              |        |
|               | 15.90±0.144                                          |             | 9.90±0.144  |              |        |
|               | 16.00±0.144                                          |             |             |              |        |
| <b>0.20M</b>  |                                                      |             |             |              |        |
| <b>Blank</b>  | 17.40±0.144                                          | 17.36±0.144 | 30.90±0.144 | 30.96±0.144  | 0.1888 |
|               | 17.40±0.144                                          |             | 31.00±0.144 |              |        |
|               | 17.30±0.144                                          |             |             |              |        |
| <b>Sample</b> | 14.35±0.189                                          | 14.28±0.189 | 31.00±0.144 |              |        |
|               | 14.30±0.189                                          |             | 31.00±0.144 |              |        |
|               | 14.20±0.189                                          |             |             |              |        |
| <b>0.25M</b>  |                                                      |             |             |              |        |
| <b>Blank</b>  | 17.40±0.144                                          | 17.36±0.144 | 30.90±0.144 | 30.96±0.144  | 0.1888 |

|               |             |             |             |  |
|---------------|-------------|-------------|-------------|--|
|               | 17.40±0.144 |             |             |  |
|               | 17.30±0.144 |             | 31.00±0.144 |  |
| <b>Sample</b> | 14.35±0.189 | 14.28±0.189 |             |  |
|               | 14.30±0.189 |             | 30.90±0.144 |  |
|               | 14.20±0.189 |             |             |  |

**Table S27.** Error in UV-Vis method of ionic strength

|               | Optical density | Average OD    | mmol CHO    | Average mmol | CV     |
|---------------|-----------------|---------------|-------------|--------------|--------|
| <b>0.05M</b>  |                 |               |             |              |        |
| <b>Blank</b>  | 0.2936±0.0062   | 0.2964±0.0062 | 3.38±0.578  | 3.54±0.578   | 6.5795 |
|               | 0.2979±0.0062   |               | 3.81±0.578  |              |        |
|               | 0.2979±0.0062   |               |             |              |        |
| <b>Sample</b> | 0.2663±0.0049   | 0.2678±0.0049 | 3.44±0.578  |              |        |
|               | 0.2671±0.0049   |               |             |              |        |
|               | 0.2701±0.0049   |               |             |              |        |
| <b>0.1M</b>   |                 |               |             |              |        |
| <b>Blank</b>  | 0.3050±0.0067   | 0.3042±0.0067 | 8.29±0.578  | 7.92±0.578   | 2.8233 |
|               | 0.3012±0.0067   |               | 7.75±0.578  |              |        |
|               | 0.3065±0.0067   |               |             |              |        |
| <b>Sample</b> | 0.2380±0.0083   | 0.2402±0.0083 | 7.74±0.578  |              |        |
|               | 0.2386±0.0083   |               |             |              |        |
|               | 0.2441±0.0083   |               |             |              |        |
| <b>0.15M</b>  |                 |               |             |              |        |
| <b>Blank</b>  | 0.3802±0.0074   | 0.3818±0.0074 | 18.72±0.351 | 18.76±0.351  | 0.7538 |
|               | 0.3853±0.0074   |               | 18.63±0.351 |              |        |
|               | 0.3800±0.0074   |               |             |              |        |
| <b>Sample</b> | 0.2290±0.0031   | 0.2276±0.0031 | 18.94±0.351 |              |        |
|               | 0.2267±0.0031   |               |             |              |        |
|               | 0.2270±0.0031   |               |             |              |        |
| <b>0.2M</b>   |                 |               |             |              |        |
| <b>Blank</b>  | 0.5716±0.0079   | 0.5751±0.0079 | 41.94±0.682 | 41.77±0.370  | 0.3385 |
|               | 0.5760±0.0079   |               | 41.71±0.682 |              |        |
|               | 0.5778±0.0079   |               |             |              |        |
| <b>Sample</b> | 0.2328±0.0108   | 0.2363±0.0108 | 41.66±0.682 |              |        |
|               | 0.2350±0.0108   |               |             |              |        |
|               | 0.2412±0.0108   |               |             |              |        |
| <b>0.25M</b>  |                 |               |             |              |        |
| <b>Blank</b>  | 0.5392±0.0113   | 0.5364±0.0113 | 40.46±0.172 | 40.42±0.172  | 0.1714 |

|               |               |               |             |  |  |
|---------------|---------------|---------------|-------------|--|--|
|               | 0.5390±0.0113 |               |             |  |  |
|               | 0.5312±0.0113 |               | 40.34±0.172 |  |  |
| <b>Sample</b> | 0.2123±0.0017 | 0.2124±0.0017 | 40.46±0.172 |  |  |
|               | 0.2132±0.0017 |               |             |  |  |
|               | 0.2118±0.0017 |               |             |  |  |

**Table S28.** Fisher statistical of ionic strength

|              | Titration   |             | S <sup>2</sup>       | UV-Vis      |             | S <sup>2</sup>       | F     |
|--------------|-------------|-------------|----------------------|-------------|-------------|----------------------|-------|
|              | mmol        | Average x   |                      | mmol        | Average x   |                      |       |
| <b>0.05M</b> |             |             |                      |             |             |                      |       |
| (1)          | 10.00±0.144 | 9.96±0.144  | 3.4x10 <sup>-3</sup> | 3.38±0.578  | 3.54±0.578  | 0.05                 | 14.70 |
| (2)          | 10.00±0.144 |             |                      | 3.81±0.578  |             |                      |       |
| (3)          | 9.90±0.144  |             |                      | 3.44±0.578  |             |                      |       |
| <b>0.10M</b> |             |             |                      |             |             |                      |       |
| (1)          | 11.00±0.144 | 10.96±0.144 | 3.4x10 <sup>-3</sup> | 8.29±0.578  | 7.92±0.578  | 0.05                 | 14.70 |
| (2)          | 11.00±0.144 |             |                      | 7.75±0.578  |             |                      |       |
| (3)          | 10.90±0.144 |             |                      | 7.74±0.578  |             |                      |       |
| <b>0.15M</b> |             |             |                      |             |             |                      |       |
| (1)          | 10.00±0.144 | 9.93±0.144  | 3.4x10 <sup>-3</sup> | 18.72±0.351 | 18.76±0.351 | 0.02                 | 5.88  |
| (2)          | 9.90±0.144  |             |                      | 18.63±0.351 |             |                      |       |
| (3)          | 9.90±0.144  |             |                      | 18.94±0.351 |             |                      |       |
| <b>0.20M</b> |             |             |                      |             |             |                      |       |
| (1)          | 30.90±0.035 | 30.96±0.144 | 3.4x10 <sup>-3</sup> | 41.94±0.370 | 41.77±0.370 | 0.02                 | 5.88  |
| (2)          | 31.00±0.035 |             |                      | 41.71±0.370 |             |                      |       |
| (3)          | 31.00±0.035 |             |                      | 41.66±0.370 |             |                      |       |
| <b>0.25M</b> |             |             |                      |             |             |                      |       |
| (1)          | 30.90±0.017 | 30.96±0.144 | 3.4x10 <sup>-3</sup> | 40.46±0.017 | 40.42±0.172 | 4.8x10 <sup>-3</sup> | 1.41  |
| (2)          | 31.00±0.017 |             |                      | 40.34±0.017 |             |                      |       |
| (3)          | 30.90±0.017 |             |                      | 40.46±0.017 |             |                      |       |

**Table S29.** Student statistical of ionic strength

| <b>Concentration (M)</b>         | <b>Titration</b> | <b>UV-Vis</b> | <b><math>d_i</math></b>             | <b><math>d_i - d_{tb}</math></b> | <b><math>(d_i - d_{tb})^2</math></b> |
|----------------------------------|------------------|---------------|-------------------------------------|----------------------------------|--------------------------------------|
| 0.05                             | 9.96             | 3.54          | 6.42                                | 10.348                           | 107.0811                             |
| 0.1                              | 10.96            | 7.92          | 3.04                                | 6.968                            | 48.55302                             |
| 0.15                             | 9.93             | 18.76         | -8.83                               | -4.902                           | 24.0296                              |
| 0.2                              | 30.96            | 41.77         | -10.81                              | -6.882                           | 47.36192                             |
| 0.25                             | 30.96            | 40.42         | -9.46                               | -5.532                           | 30.60302                             |
|                                  |                  |               | <b><math>d_{tb} = -3.928</math></b> |                                  | <b>Total = 257.6287</b>              |
| <b><math>s_d = 8.0254</math></b> |                  |               |                                     |                                  |                                      |
| <b><math>t = 1.094</math></b>    |                  |               |                                     |                                  |                                      |



**Table S30.** ANOVA two-factor with replication of ionic strength

| Anova: Two-Factor With Replication |         |         |         |         |         |         |
|------------------------------------|---------|---------|---------|---------|---------|---------|
|                                    | 0.05    | 0.1     | 0.15    | 0.2     | 0.25    | Total   |
| SUMMARY                            |         |         |         |         |         |         |
| Count                              | 3       | 3       | 3       | 3       | 3       | 15      |
| Sum                                | 29.9    | 32.9    | 29.8    | 92.9    | 92.8    | 278.3   |
| Average                            | 9.96666 | 10.9666 | 9.93333 | 30.9666 | 30.9333 | 18.5533 |
|                                    | 7       | 7       | 3       | 7       | 3       | 3       |
| Variance                           | 0.00333 | 0.00333 | 0.00333 | 0.00333 | 0.00333 | 109.919 |
|                                    | 3       | 3       | 3       | 3       | 3       | 8       |
|                                    |         |         |         |         |         |         |
| Count                              | 3       | 3       | 3       | 3       | 3       | 15      |
| Sum                                | 10.63   | 23.78   | 56.29   | 125.31  | 121.26  | 337.27  |
| Average                            | 3.54333 | 7.92666 | 18.7633 | 41.77   | 40.42   | 22.4846 |
|                                    | 3       | 7       | 3       |         |         | 7       |
| Variance                           | 0.05423 | 0.09903 | 0.02543 | 0.0223  | 0.0048  | 273.920 |
|                                    | 3       | 3       | 3       |         |         | 4       |
|                                    |         |         |         |         |         |         |
| <i>Total</i>                       |         |         |         |         |         |         |
| Count                              | 6       | 6       | 6       | 6       | 6       |         |
| Sum                                | 40.53   | 56.68   | 86.09   | 218.21  | 214.06  |         |
| Average                            | 6.755   | 9.44666 | 14.3483 | 36.3683 | 35.6766 |         |
|                                    |         | 7       | 3       | 3       | 7       |         |
| Variance                           | 12.4007 | 2.81342 | 23.4021 | 35.0238 | 27.0023 |         |
|                                    | 9       | 7       | 8       | 6       | 1       |         |

| ANOVA                         |          |    |          |          |          |          |
|-------------------------------|----------|----|----------|----------|----------|----------|
| Source                        | SS       | df | MS       | F        | P-value  | F crit   |
| <b>Method (A)</b>             | 115.9154 | 1  | 115.9154 | 5210.46  | 1.18E-25 | 4.351244 |
| <b>NaCl concentration (B)</b> | 4986.466 | 4  | 1246.616 | 56036.1  | 3.52E-40 | 2.866081 |
| <b>Interaction AB</b>         | 386.8525 | 4  | 96.71312 | 4347.308 | 4.4E-29  | 2.866081 |
| <b>Error</b>                  | 0.444933 | 20 | 0.022247 |          |          |          |
| <b>Total</b>                  | 5489.678 | 29 |          |          |          |          |

**Table S31.** Error of condensed temperature (T = 40°C)

| <b>Optical density</b> | <b>Average OD</b> | <b>CV</b> |
|------------------------|-------------------|-----------|
| <b>26 mL</b>           |                   |           |
| 0.6099±0.0016          | 0.6092±0.0016     | 0.1057    |
| 0.6089±0.0016          |                   |           |
| 0.6087±0.0016          |                   |           |
| <b>28 mL</b>           |                   |           |
| 0.6389±0.0030          | 0.6378±0.0030     | 0.1917    |
| 0.6381±0.0030          |                   |           |
| 0.6365±0.0030          |                   |           |
| <b>30 mL</b>           |                   |           |
| 0.6800±0.0014          | 0.6806±0.0014     | 0.0811    |
| 0.6810±0.0014          |                   |           |
| 0.6809±0.0014          |                   |           |
| <b>32 mL</b>           |                   |           |
| 0.7451±0.0009          | 0.7449±0.0009     | 0.0511    |
| 0.7445±0.0009          |                   |           |
| 0.7452±0.0009          |                   |           |
| <b>34 mL</b>           |                   |           |
| 0.7899±0.0016          | 0.7896±0.0016     | 0.0815    |
| 0.7889±0.0016          |                   |           |
| 0.7901±0.0016          |                   |           |
| <b>36 mL</b>           |                   |           |
| 0.8479±0.0010          | 0.8475±0.0010     | 0.0479    |
| 0.8471±0.0010          |                   |           |
| 0.8476±0.0010          |                   |           |
| <b>38 mL</b>           |                   |           |
| 0.9078±0.0016          | 0.9071±0.0016     | 0.0718    |
| 0.9071±0.0016          |                   |           |
| 0.9065±0.0016          |                   |           |
| <b>40 mL</b>           |                   |           |
| 0.9666±0.0018          | 0.9663±0.0018     | 0.0763    |

|               |               |         |
|---------------|---------------|---------|
| 0.9669±0.0018 |               |         |
| 0.9655±0.0018 |               |         |
| <b>42 mL</b>  |               |         |
| 1.0159±0.0088 | 1.0156±0.0088 | 0.35222 |
| 1.0155±0.0088 |               |         |
| 1.0156±0.0088 |               |         |
| <b>44 mL</b>  |               |         |
| 1.0588±0.0009 | 1.0585±0.0009 | 0.0359  |
| 1.0581±0.0009 |               |         |
| 1.0587±0.0009 |               |         |

Trendline of T = 40°C:  $y = 0.0262x - 0.0929$  with  $R^2 = 0.9962$ .

**Table S32.** Error of condensed temperature (T = 60°C)

| <b>Optical density</b> | <b>Average OD</b> | <b>CV</b> |
|------------------------|-------------------|-----------|
| <b>26 mL</b>           |                   |           |
| 0.5377±0.0007          | 0.5376±0.0007     | 0.0468    |
| 0.5379±0.0007          |                   |           |
| 0.5373±0.0007          |                   |           |
| <b>28 mL</b>           |                   |           |
| 0.5699±0.0005          | 0.5696±0.0005     | 0.0360    |
| 0.5694±0.0005          |                   |           |
| 0.5696±0.0005          |                   |           |
| <b>30 mL</b>           |                   |           |
| 0.6305±0.0014          | 0.6300±0.0014     | 0.0904    |
| 0.6302±0.0014          |                   |           |
| 0.6294±0.0014          |                   |           |
| <b>32 mL</b>           |                   |           |
| 0.6690±0.0012          | 0.6684±0.0012     | 0.0717    |
| 0.6683±0.0012          |                   |           |
| 0.6681±0.0012          |                   |           |
| <b>34 mL</b>           |                   |           |
| 0.7268±0.0011          | 0.7268±0.0011     | 0.0622    |
| 0.7264±0.0011          |                   |           |
| 0.7273±0.0011          |                   |           |
| <b>36 mL</b>           |                   |           |
| 0.7548±0.0015          | 0.7547±0.0015     | 0.0800    |
| 0.7541±0.0015          |                   |           |
| 0.7553±0.0015          |                   |           |
| <b>38 mL</b>           |                   |           |
| 0.8299±0.0012          | 0.8293±0.0012     | 0.0596    |
| 0.8291±0.0012          |                   |           |
| 0.8290±0.0012          |                   |           |
| <b>40 mL</b>           |                   |           |
| 0.8729±0.0016          | 0.8728±0.0016     | 0.0751    |

|               |               |        |
|---------------|---------------|--------|
| 0.8722±0.0016 |               |        |
| 0.8735±0.0016 |               |        |
| <b>42 mL</b>  |               |        |
| 0.9011±0.0021 | 0.9019±0.0021 | 0.0944 |
| 0.9019±0.0021 |               |        |
| 0.9028±0.0021 |               |        |
| <b>44 mL</b>  |               |        |
| 0.9216±0.0011 | 0.9211±0.0011 | 0.0491 |
| 0.9211±0.0011 |               |        |
| 0.9207±0.0011 |               |        |

Trendline of T = 60°C:  $y = 0.0227x - 0.0545$  with  $R^2 = 0.9903$ .

**Table S33.** Error of condensed temperature (T = 80°C)

| <b>Optical density</b> | <b>Average OD</b> | <b>CV</b> |
|------------------------|-------------------|-----------|
| <b>26 mL</b>           |                   |           |
| 0.6101±0.0021          | 0.6100±0.0021     | 0.1400    |
| 0.6109±0.0021          |                   |           |
| 0.6092±0.0021          |                   |           |
| <b>28 mL</b>           |                   |           |
| 0.6777±0.0023          | 0.6772±0.0023     | 0.1377    |
| 0.6779±0.0023          |                   |           |
| 0.6762±0.0023          |                   |           |
| <b>30 mL</b>           |                   |           |
| 0.7231±0.0013          | 0.7227±0.0013     | 0.0764    |
| 0.7221±0.0013          |                   |           |
| 0.7230±0.0013          |                   |           |
| <b>32 mL</b>           |                   |           |
| 0.7679±0.0010          | 0.7674±0.0010     | 0.0537    |
| 0.7671±0.0010          |                   |           |
| 0.7674±0.0010          |                   |           |
| <b>34 mL</b>           |                   |           |
| 0.8155±0.0019          | 0.8157±0.0019     | 0.0953    |
| 0.8151±0.0019          |                   |           |
| 0.8166±0.0019          |                   |           |
| <b>36 mL</b>           |                   |           |
| 0.8712±0.0016          | 0.8709±0.0016     | 0.0739    |
| 0.8702±0.0016          |                   |           |
| 0.8714±0.0016          |                   |           |
| <b>38 mL</b>           |                   |           |
| 0.9162±0.0005          | 0.9160±0.0005     | 0.0231    |
| 0.9158±0.0005          |                   |           |
| 0.9161±0.0005          |                   |           |
| <b>40 mL</b>           |                   |           |
| 0.9644±0.0018          | 0.9647±0.0018     | 0.0786    |

|               |               |        |
|---------------|---------------|--------|
| 0.9642±0.0018 |               |        |
| 0.9656±0.0018 |               |        |
| <b>42 mL</b>  |               |        |
| 0.9995±0.0027 | 0.9999±0.0027 | 0.1115 |
| 0.9991±0.0027 |               |        |
| 1.0012±0.0027 |               |        |
| <b>44 mL</b>  |               |        |
| 1.0433±0.0007 | 1.0430±0.0007 | 0.0295 |
| 1.0431±0.0007 |               |        |
| 1.0427±0.0007 |               |        |

Trendline of T = 80°C:  $y = 0.0238x + 0.0044$  with  $R^2 = 0.9972$ .

**Table S34.** Error of condensed temperature (T = 100°C)

| <b>Optical density</b> | <b>Average OD</b> | <b>CV</b> |
|------------------------|-------------------|-----------|
| <b>26 mL</b>           |                   |           |
| 0.6131±0.0021          | 0.6130±0.0021     | 0.1393    |
| 0.6139±0.0021          |                   |           |
| 0.6122±0.0021          |                   |           |
| <b>28 mL</b>           |                   |           |
| 0.6459±0.0011          | 0.6454±0.0011     | 0.0710    |
| 0.6455±0.0011          |                   |           |
| 0.6450±0.0011          |                   |           |
| <b>30 mL</b>           |                   |           |
| 0.7169±0.0004          | 0.7167±0.0004     | 0.0220    |
| 0.7166±0.0004          |                   |           |
| 0.7167±0.0004          |                   |           |
| <b>32 mL</b>           |                   |           |
| 0.7508±0.0010          | 0.7504±0.0010     | 0.0565    |
| 0.7506±0.0010          |                   |           |
| 0.7500±0.0010          |                   |           |
| <b>34 mL</b>           |                   |           |
| 0.7906±0.0008          | 0.7902±0.0008     | 0.0410    |
| 0.7901±0.0008          |                   |           |
| 0.7900±0.0008          |                   |           |
| <b>36 mL</b>           |                   |           |
| 0.8377±0.0012          | 0.8376±0.0012     | 0.0602    |
| 0.8371±0.0012          |                   |           |
| 0.8381±0.0012          |                   |           |
| <b>38 mL</b>           |                   |           |
| 0.8854±0.0008          | 0.8857±0.0008     | 0.0399    |
| 0.8857±0.0008          |                   |           |
| 0.8861±0.0008          |                   |           |
| <b>40 mL</b>           |                   |           |
| 0.9466±0.0017          | 0.9467±0.0017     | 0.0750    |



|               |               |        |
|---------------|---------------|--------|
| 0.9461±0.0017 |               |        |
| 0.9475±0.0017 |               |        |
| <b>42 mL</b>  |               |        |
| 0.9985±0.0010 | 0.9985±0.0010 | 0.0400 |
| 0.9981±0.0010 |               |        |
| 0.9989±0.0010 |               |        |
| <b>44 mL</b>  |               |        |
| 1.0599±0.0010 | 1.0598±0.0010 | 0.0383 |
| 1.0594±0.0010 |               |        |
| 1.0602±0.0010 |               |        |

Trendline of T = 100°C:  $y = 0.0245x - 0.0343$  with  $R^2 = 0.9952$ .

**Table S35.** Error of condensed time (t = 2h)

| <b>Optical density</b> | <b>Average OD</b> | <b>CV</b> |
|------------------------|-------------------|-----------|
| <b>26 mL</b>           |                   |           |
| 0.6243±0.0013          | 0.6243±0.0013     | 0.0884    |
| 0.6249±0.0013          |                   |           |
| 0.6238±0.0013          |                   |           |
| <b>28 mL</b>           |                   |           |
| 0.7288±0.0009          | 0.7284±0.0009     | 0.0494    |
| 0.7285±0.0009          |                   |           |
| 0.7281±0.0009          |                   |           |
| <b>30 mL</b>           |                   |           |
| 0.7825±0.0006          | 0.7822±0.0006     | 0.0299    |
| 0.7821±0.0006          |                   |           |
| 0.7821±0.0006          |                   |           |
| <b>32 mL</b>           |                   |           |
| 0.8290±0.0004          | 0.8288±0.0004     | 0.0208    |
| 0.8287±0.0004          |                   |           |
| 0.8289±0.0004          |                   |           |
| <b>34 mL</b>           |                   |           |
| 0.8833±0.0008          | 0.8835±0.0008     | 0.0366    |
| 0.8839±0.0008          |                   |           |
| 0.8836±0.0008          |                   |           |
| <b>36 mL</b>           |                   |           |
| 0.9229±0.0008          | 0.9225±0.0008     | 0.0383    |
| 0.9222±0.0008          |                   |           |
| 0.9225±0.0008          |                   |           |
| <b>38 mL</b>           |                   |           |
| 0.9819±0.0022          | 0.9810±0.0022     | 0.0920    |
| 0.9811±0.0022          |                   |           |
| 0.9801±0.0022          |                   |           |
| <b>40 mL</b>           |                   |           |
| 1.0368±0.0004          | 1.0366±0.0004     | 0.0152    |

|               |               |        |
|---------------|---------------|--------|
| 1.0366±0.0004 |               |        |
| 1.0365±0.0004 |               |        |
| <b>42 mL</b>  |               |        |
| 1.0888±0.0026 | 1.0880±0.0026 | 0.0992 |
| 1.0885±0.0026 |               |        |
| 1.0868±0.0026 |               |        |
| <b>44 mL</b>  |               |        |
| 1.1309±0.0011 | 1.1304±0.0011 | 0.0400 |
| 1.1304±0.0011 |               |        |
| 1.1300±0.0011 |               |        |

Trendline of t = 2h:  $y = 0.0268x - 0.037$  with  $R^2 = 0.9915$ .

**Table S36.** Error of condensed time (t = 4h)

| <b>Optical density</b> | <b>Average OD</b> | <b>CV</b> |
|------------------------|-------------------|-----------|
| <b>26 mL</b>           |                   |           |
| 0.6191±0.0015          | 0.6196±0.0015     | 0.0988    |
| 0.6195±0.0015          |                   |           |
| 0.6203±0.0015          |                   |           |
| <b>28 mL</b>           |                   |           |
| 0.6566±0.0014          | 0.6568±0.0014     | 0.0847    |
| 0.6565±0.0014          |                   |           |
| 0.6575±0.0014          |                   |           |
| <b>30 mL</b>           |                   |           |
| 0.7333±0.0009          | 0.7337±0.0009     | 0.0518    |
| 0.7339±0.0009          |                   |           |
| 0.7340±0.0009          |                   |           |
| <b>32 mL</b>           |                   |           |
| 0.7733±0.0020          | 0.7738±0.0020     | 0.1057    |
| 0.7735±0.0020          |                   |           |
| 0.7748±0.0020          |                   |           |
| <b>34 mL</b>           |                   |           |
| 0.8128±0.0007          | 0.8125±0.0007     | 0.0379    |
| 0.8122±0.0007          |                   |           |
| 0.8126±0.0007          |                   |           |
| <b>36 mL</b>           |                   |           |
| 0.8705±0.0008          | 0.8701±0.0008     | 0.0406    |
| 0.8701±0.0008          |                   |           |
| 0.8698±0.0008          |                   |           |
| <b>38 mL</b>           |                   |           |
| 0.9291±0.0007          | 0.9288±0.0007     | 0.0332    |
| 0.9285±0.0007          |                   |           |
| 0.9289±0.0007          |                   |           |
| <b>40 mL</b>           |                   |           |
| 0.9799±0.0016          | 0.9791±0.0016     | 0.0696    |

|               |               |        |
|---------------|---------------|--------|
| 0.9789±0.0016 |               |        |
| 0.9786±0.0016 |               |        |
| <b>42 mL</b>  |               |        |
| 1.0122±0.0008 | 1.0125±0.0008 | 0.0349 |
| 1.0129±0.0008 |               |        |
| 1.0125±0.0008 |               |        |
| <b>44 mL</b>  |               |        |
| 1.0604±0.0010 | 1.0600±0.0010 | 0.0383 |
| 1.0601±0.0010 |               |        |
| 1.0596±0.0010 |               |        |

Trendline of t = 4h:  $y = 0.0249x - 0.0253$  with  $R^2 = 0.9964$ .

**Table S37.** Error of condensed time (t = 6h)

| <b>Optical density</b> | <b>Average OD</b> | <b>CV</b> |
|------------------------|-------------------|-----------|
| <b>26 mL</b>           |                   |           |
| 0.6105±0.0012          | 0.6100±0.0012     | 0.0827    |
| 0.6101±0.0012          |                   |           |
| 0.6095±0.0012          |                   |           |
| <b>28 mL</b>           |                   |           |
| 0.6777±0.0011          | 0.6772±0.0011     | 0.0676    |
| 0.6773±0.0011          |                   |           |
| 0.6768±0.0011          |                   |           |
| <b>30 mL</b>           |                   |           |
| 0.7277±0.0047          | 0.7273±0.0047     | 0.2653    |
| 0.7273±0.0047          |                   |           |
| 0.7300±0.0047          |                   |           |
| <b>32 mL</b>           |                   |           |
| 0.7677±0.0008          | 0.7674±0.0008     | 0.0432    |
| 0.7671±0.0008          |                   |           |
| 0.7676±0.0008          |                   |           |
| <b>34 mL</b>           |                   |           |
| 0.8155±0.0005          | 0.8157±0.0005     | 0.0260    |
| 0.8158±0.0005          |                   |           |
| 0.8159±0.0005          |                   |           |
| <b>36 mL</b>           |                   |           |
| 0.8712±0.0009          | 0.8709±0.0009     | 0.0437    |
| 0.8705±0.0009          |                   |           |
| 0.8711±0.0009          |                   |           |
| <b>38 mL</b>           |                   |           |
| 0.9165±0.0010          | 0.9160±0.0010     | 0.0456    |
| 0.9159±0.0010          |                   |           |
| 0.9157±0.0010          |                   |           |
| <b>40 mL</b>           |                   |           |
| 0.9644±0.0445          | 0.9647±0.0445     | 1.8963    |

|               |               |        |
|---------------|---------------|--------|
| 0.9649±0.0445 |               |        |
| 0.9649±0.0445 |               |        |
| <b>42 mL</b>  |               |        |
| 0.9999±0.0021 | 0.9999±0.0021 | 0.0851 |
| 0.9991±0.0021 |               |        |
| 1.0008±0.0021 |               |        |
| <b>44 mL</b>  |               |        |
| 1.0430±0.0014 | 1.0430±0.0014 | 0.0529 |
| 1.0436±0.0014 |               |        |
| 1.0425±0.0014 |               |        |

Trendline of t = 6h:  $y = 0.0238x + 0.0044$  with  $R^2 = 0.9972$ .

**Table S38.** Error of condensed time (t = 8h)

| <b>Optical density</b> | <b>Average OD</b> | <b>CV</b> |
|------------------------|-------------------|-----------|
| <b>26 mL</b>           |                   |           |
| 0.6101±0.0004          | 0.6102±0.0004     | 0.0259    |
| 0.6102±0.0004          |                   |           |
| 0.6104±0.0004          |                   |           |
| <b>28 mL</b>           |                   |           |
| 0.6778±0.0011          | 0.6772±0.0011     | 0.0708    |
| 0.6771±0.0011          |                   |           |
| 0.6769±0.0011          |                   |           |
| <b>30 mL</b>           |                   |           |
| 0.7221±0.0014          | 0.7227±0.0014     | 0.0788    |
| 0.7229±0.0014          |                   |           |
| 0.7232±0.0014          |                   |           |
| <b>32 mL</b>           |                   |           |
| 0.7675±0.0020          | 0.7671±0.0020     | 0.1063    |
| 0.7677±0.0020          |                   |           |
| 0.7662±0.0020          |                   |           |
| <b>34 mL</b>           |                   |           |
| 0.8154±0.0010          | 0.8158±0.0010     | 0.0497    |
| 0.8159±0.0010          |                   |           |
| 0.8162±0.0010          |                   |           |
| <b>36 mL</b>           |                   |           |
| 0.8708±0.0009          | 0.8705±0.0009     | 0.0437    |
| 0.8701±0.0009          |                   |           |
| 0.8707±0.0009          |                   |           |
| <b>38 mL</b>           |                   |           |
| 0.9161±0.0008          | 0.9161±0.0008     | 0.0385    |
| 0.9165±0.0008          |                   |           |
| 0.9158±0.0008          |                   |           |
| <b>40 mL</b>           |                   |           |
| 0.9645±0.0012          | 0.9648±0.0012     | 0.00513   |



|               |               |        |
|---------------|---------------|--------|
| 0.9646±0.0012 |               |        |
| 0.9654±0.0012 |               |        |
| <b>42 mL</b>  |               |        |
| 0.9991±0.0014 | 0.9995±0.0014 | 0.0587 |
| 0.9993±0.0014 |               |        |
| 1.0002±0.0014 |               |        |
| <b>44 mL</b>  |               |        |
| 1.0439±0.0015 | 1.0432±0.0015 | 0.0587 |
| 1.0431±0.0015 |               |        |
| 1.0427±0.0015 |               |        |

Trendline of  $t = 8h$ :  $y=0.0238x + 0.0045$  with  $R^2 = 0.9972$ .

**Table S39.** Error of pH adsorption solution (pH = 1)

| <b>Optical density</b> | <b>Average OD</b> | <b>CV</b> |
|------------------------|-------------------|-----------|
| <b>26 mL</b>           |                   |           |
| 0.5525±0.0028          | 0.5513±0.0028     | 0.2087    |
| 0.5513±0.0028          |                   |           |
| 0.5502±0.0028          |                   |           |
| <b>28 mL</b>           |                   |           |
| 0.6119±0.0017          | 0.6111±0.0017     | 0.1162    |
| 0.6110±0.0017          |                   |           |
| 0.6105±0.0017          |                   |           |
| <b>30 mL</b>           |                   |           |
| 0.6448±0.0016          | 0.6441±0.0016     | 0.1012    |
| 0.6441±0.0016          |                   |           |
| 0.6435±0.0016          |                   |           |
| <b>32 mL</b>           |                   |           |
| 0.6992±0.0012          | 0.6986±0.0012     | 0.0736    |
| 0.6985±0.0012          |                   |           |
| 0.6982±0.0012          |                   |           |
| <b>34 mL</b>           |                   |           |
| 0.7576±0.0010          | 0.7572±0.0010     | 0.0536    |
| 0.7571±0.0010          |                   |           |
| 0.7568±0.0010          |                   |           |
| <b>36 mL</b>           |                   |           |
| 0.7935±0.0028          | 0.7933±0.0028     | 0.1461    |
| 0.7944±0.0028          |                   |           |
| 0.7921±0.0028          |                   |           |
| <b>38 mL</b>           |                   |           |
| 0.8528±0.0012          | 0.8527±0.0012     | 0.0592    |
| 0.8532±0.0012          |                   |           |
| 0.8522±0.0012          |                   |           |
| <b>40 mL</b>           |                   |           |
| 0.8942±0.0026          | 0.8932±0.0026     | 0.1200    |

|               |               |        |
|---------------|---------------|--------|
| 0.8935±0.0026 |               |        |
| 0.8921±0.0026 |               |        |
| <b>42 mL</b>  |               |        |
| 0.9331±0.0012 | 0.9325±0.0012 | 0.0552 |
| 0.9321±0.0012 |               |        |
| 0.9324±0.0012 |               |        |
| <b>44 mL</b>  |               |        |
| 0.9773±0.0012 | 0.9775±0.0012 | 0.0506 |
| 0.9781±0.0012 |               |        |
| 0.9772±0.0012 |               |        |

Trendline of pH = 1:  $y = 0.0237x - 0.0592$  with  $R^2 = 0.9976$ .

**Table S40.** Error of pH adsorption solution (pH = 2)

| <b>Optical density</b> | <b>Average OD</b> | <b>CV</b> |
|------------------------|-------------------|-----------|
| <b>26 mL</b>           |                   |           |
| 0.5889±0.0021          | 0.5887±0.0021     | 0.1466    |
| 0.5895±0.0021          |                   |           |
| 0.5878±0.0021          |                   |           |
| <b>28 mL</b>           |                   |           |
| 0.6263±0.0015          | 0.6268±0.0015     | 0.0970    |
| 0.6275±0.0015          |                   |           |
| 0.6268±0.0015          |                   |           |
| <b>30 mL</b>           |                   |           |
| 0.6817±0.0034          | 0.6831±0.0034     | 0.2052    |
| 0.6845±0.0034          |                   |           |
| 0.6832±0.0034          |                   |           |
| <b>32 mL</b>           |                   |           |
| 0.7249±0.0022          | 0.7240±0.0022     | 0.1246    |
| 0.7231±0.0022          |                   |           |
| 0.7239±0.0022          |                   |           |
| <b>34 mL</b>           |                   |           |
| 0.7788±0.0024          | 0.7777±0.0024     | 0.1250    |
| 0.7769±0.0024          |                   |           |
| 0.7775±0.0024          |                   |           |
| <b>36 mL</b>           |                   |           |
| 0.8302±0.0021          | 0.8292±0.0021     | 0.1044    |
| 0.8291±0.0021          |                   |           |
| 0.8285±0.0021          |                   |           |
| <b>38 mL</b>           |                   |           |
| 0.8747±0.0020          | 0.8744±0.0020     | 0.0953    |
| 0.8751±0.0020          |                   |           |
| 0.8735±0.0020          |                   |           |
| <b>40 mL</b>           |                   |           |

|               |               |        |
|---------------|---------------|--------|
| 0.9318±0.0017 | 0.9311±0.0017 | 0.0755 |
| 0.9312±0.0017 |               |        |
| 0.9304±0.0017 |               |        |
| <b>42 mL</b>  |               |        |
| 0.9807±0.0010 | 0.9803±0.0010 | 0.0414 |
| 0.9804±0.0010 |               |        |
| 0.9799±0.0010 |               |        |
| <b>44 mL</b>  |               |        |
| 1.0223±0.0005 | 1.0220±0.0005 | 0.0218 |
| 1.0220±0.0005 |               |        |
| 1.0219±0.0005 |               |        |

Trendline of pH = 2:  $y = 0.0246x - 0.0572$  with  $R^2 = 0.9992$ .

**Table S41.** Error of pH adsorption solution (pH = 3).

| <b>Optical density</b> | <b>Average OD</b> | <b>CV</b> |
|------------------------|-------------------|-----------|
| <b>26 mL</b>           |                   |           |
| 0.5488±0.0030          | 0.5491±0.0030     | 0.2248    |
| 0.5505±0.0030          |                   |           |
| 0.5481±0.0030          |                   |           |
| <b>28 mL</b>           |                   |           |
| 0.6045±0.0024          | 0.6035±0.0024     | 0.1661    |
| 0.6036±0.0024          |                   |           |
| 0.6025±0.0024          |                   |           |
| <b>30 mL</b>           |                   |           |
| 0.6395±0.0021          | 0.6386±0.0021     | 0.1337    |
| 0.6387±0.0021          |                   |           |
| 0.6378±0.0021          |                   |           |
| <b>32 mL</b>           |                   |           |
| 0.7020±0.0019          | 0.7011±0.0019     | 0.1109    |
| 0.7009±0.0019          |                   |           |
| 0.7005±0.0019          |                   |           |
| <b>34 mL</b>           |                   |           |
| 0.7486±0.0015          | 0.7479±0.0015     | 0.0818    |
| 0.7478±0.0015          |                   |           |
| 0.7474±0.0015          |                   |           |
| <b>36 mL</b>           |                   |           |
| 0.7778±0.0021          | 0.7769±0.0021     | 0.1095    |
| 0.7769±0.0021          |                   |           |
| 0.7761±0.0021          |                   |           |
| <b>38 mL</b>           |                   |           |
| 0.8409±0.0031          | 0.8396±0.0031     | 0.1492    |
| 0.8397±0.0031          |                   |           |
| 0.8384±0.0031          |                   |           |
| <b>40 mL</b>           |                   |           |
| 0.8756±0.0013          | 0.8750±0.0013     | 0.0636    |

|               |               |        |
|---------------|---------------|--------|
| 0.8751±0.0013 |               |        |
| 0.8745±0.0013 |               |        |
| <b>42 mL</b>  |               |        |
| 0.9308±0.0023 | 0.9298±0.0023 | 0.1023 |
| 0.9298±0.0023 |               |        |
| 0.9289±0.0023 |               |        |
| <b>44 mL</b>  |               |        |
| 0.9707±0.0018 | 0.9701±0.0018 | 0.0760 |
| 0.9704±0.0018 |               |        |
| 0.9693±0.0018 |               |        |

Trendline of pH = 3:  $y = 0.0233x - 0.0535$  with  $R^2 = 0.9978$ .

**Table S42.** Error of pH adsorption solution (pH = 4)

| <b>Optical density</b> | <b>Average OD</b> | <b>CV</b> |
|------------------------|-------------------|-----------|
| <b>26 mL</b>           |                   |           |
| 0.5806±0.0021          | 0.5796±0.0021     | 0.1494    |
| 0.5795±0.0021          |                   |           |
| 0.5789±0.0021          |                   |           |
| <b>28 mL</b>           |                   |           |
| 0.6397±0.0014          | 0.6390±0.0014     | 0.0919    |
| 0.6386±0.0014          |                   |           |
| 0.6388±0.0014          |                   |           |
| <b>30 mL</b>           |                   |           |
| 0.6619±0.0018          | 0.6611±0.0018     | 0.1136    |
| 0.6611±0.0018          |                   |           |
| 0.6604±0.0018          |                   |           |
| <b>32 mL</b>           |                   |           |
| 0.7221±0.0014          | 0.7216±0.0014     | 0.0790    |
| 0.7210±0.0014          |                   |           |
| 0.7218±0.0014          |                   |           |
| <b>34 mL</b>           |                   |           |
| 0.7712±0.0020          | 0.7710±0.0020     | 0.1053    |
| 0.7702±0.0020          |                   |           |
| 0.7718±0.0020          |                   |           |
| <b>36 mL</b>           |                   |           |
| 0.8258±0.0021          | 0.8250±0.0021     | 0.1046    |
| 0.8252±0.0021          |                   |           |
| 0.8241±0.0021          |                   |           |
| <b>38 mL</b>           |                   |           |
| 0.8578±0.0013          | 0.8572±0.0013     | 0.0644    |
| 0.8572±0.0013          |                   |           |
| 0.8567±0.0013          |                   |           |
| <b>40 mL</b>           |                   |           |
| 0.9092±0.0026          | 0.9081±0.0026     | 0.1157    |



|               |               |        |
|---------------|---------------|--------|
| 0.9071±0.0026 |               |        |
| 0.9081±0.0026 |               |        |
| <b>42 mL</b>  |               |        |
| 0.9638±0.0014 | 0.9637±0.0014 | 0.0596 |
| 0.9629±0.0014 |               |        |
| 0.9638±0.0014 |               |        |
| <b>44 mL</b>  |               |        |
| 1.0115±0.0017 | 1.0108±0.0017 | 0.0696 |
| 1.0101±0.0017 |               |        |
| 1.0109±0.0017 |               |        |

Trendline of pH = 4:  $y = 0.0238x - 0.0388$  with  $R^2 = 0.9974$ .

**Table S43.** Error of pH adsorption solution (pH = 5)

| <b>Optical density</b> | <b>Average OD</b> | <b>CV</b> |
|------------------------|-------------------|-----------|
| <b>26 mL</b>           |                   |           |
| 0.6025±0.0012          | 0.6019±0.0012     | 0.0855    |
| 0.6015±0.0012          |                   |           |
| 0.6018±0.0012          |                   |           |
| <b>28 mL</b>           |                   |           |
| 0.6605±0.0024          | 0.6593±0.0024     | 0.1521    |
| 0.6581±0.0024          |                   |           |
| 0.6594±0.0024          |                   |           |
| <b>30 mL</b>           |                   |           |
| 0.7005±0.0025          | 0.7000±0.0025     | 0.1463    |
| 0.7008±0.0025          |                   |           |
| 0.6989±0.0025          |                   |           |
| <b>32 mL</b>           |                   |           |
| 0.7441±0.0021          | 0.7433±0.0021     | 0.1161    |
| 0.7424±0.0021          |                   |           |
| 0.7435±0.0021          |                   |           |
| <b>34 mL</b>           |                   |           |
| 0.7982±0.0022          | 0.7973±0.0022     | 0.1132    |
| 0.7974±0.0022          |                   |           |
| 0.7964±0.0022          |                   |           |
| <b>36 mL</b>           |                   |           |
| 0.8411±0.0020          | 0.8405±0.0020     | 0.0970    |
| 0.8409±0.0020          |                   |           |
| 0.8396±0.0020          |                   |           |
| <b>38 mL</b>           |                   |           |
| 0.8845±0.0015          | 0.8851±0.0015     | 0.0682    |
| 0.8857±0.0015          |                   |           |
| 0.8852±0.0015          |                   |           |
| <b>40 mL</b>           |                   |           |
| 0.9394±0.0034          | 0.9394±0.0034     | 0.1494    |

|               |               |        |
|---------------|---------------|--------|
| 0.9409±0.0034 |               |        |
| 0.9381±0.0034 |               |        |
| <b>42 mL</b>  |               |        |
| 0.9917±0.0016 | 0.9917±0.0016 | 0.0657 |
| 0.9924±0.0016 |               |        |
| 0.9911±0.0016 |               |        |
| <b>44 mL</b>  |               |        |
| 1.0365±0.0016 | 1.0364±0.0016 | 0.0632 |
| 1.0371±0.0016 |               |        |
| 1.0358±0.0016 |               |        |

Trendline of pH = 5:  $y = 0.0239x - 0.0187$  with  $R^2 = 0.9992$ .

**Table S44.** Error of pH adsorption solution (pH = 6)

| <b>Optical density</b> | <b>Average OD</b> | <b>CV</b> |
|------------------------|-------------------|-----------|
| <b>26 mL</b>           |                   |           |
| 0.6051±0.0022          | 0.6060±0.0022     | 0.1489    |
| 0.6061±0.0022          |                   |           |
| 0.6069±0.0022          |                   |           |
| <b>28 mL</b>           |                   |           |
| 0.6532±0.0018          | 0.6533±0.0018     | 0.1155    |
| 0.6525±0.0018          |                   |           |
| 0.6540±0.0018          |                   |           |
| <b>30 mL</b>           |                   |           |
| 0.6910±0.0011          | 0.6905±0.0011     | 0.0655    |
| 0.6901±0.0011          |                   |           |
| 0.6905±0.0011          |                   |           |
| <b>32 mL</b>           |                   |           |
| 0.7425±0.0013          | 0.7419±0.0013     | 0.0744    |
| 0.7414±0.0013          |                   |           |
| 0.7419±0.0013          |                   |           |
| <b>34 mL</b>           |                   |           |
| 0.7681±0.0012          | 0.7676±0.0012     | 0.0676    |
| 0.7678±0.0012          |                   |           |
| 0.7671±0.0012          |                   |           |
| <b>36 mL</b>           |                   |           |
| 0.8279±0.0013          | 0.8275±0.0013     | 0.0667    |
| 0.8278±0.0013          |                   |           |
| 0.8269±0.0013          |                   |           |
| <b>38 mL</b>           |                   |           |
| 0.8689±0.0015          | 0.8682±0.0015     | 0.0700    |
| 0.8682±0.0015          |                   |           |
| 0.8677±0.0015          |                   |           |
| <b>40 mL</b>           |                   |           |
| 0.9369±0.0014          | 0.9362±0.0014     | 0.0613    |

|               |               |        |
|---------------|---------------|--------|
| 0.9361±0.0014 |               |        |
| 0.9358±0.0014 |               |        |
| <b>42 mL</b>  |               |        |
| 0.9739±0.0013 | 0.9735±0.0013 | 0.0567 |
| 0.9729±0.0013 |               |        |
| 0.9738±0.0013 |               |        |
| <b>44 mL</b>  |               |        |
| 1.0298±0.0014 | 1.0292±0.0014 | 0.0536 |
| 1.0287±0.0014 |               |        |
| 1.0292±0.0014 |               |        |

Trendline of pH = 6:  $y = 0.0234x - 0.0091$  with  $R^2 = 0.9956$ .

**Table S45.** Error of adsorption solution's temperature (T = 30°C)

| <b>Optical density</b> | <b>Average OD</b> | <b>CV</b> |
|------------------------|-------------------|-----------|
| <b>26 mL</b>           |                   |           |
| 0.6058±0.0012          | 0.6053±0.0012     | 0.0834    |
| 0.6054±0.0012          |                   |           |
| 0.6048±0.0012          |                   |           |
| <b>28 mL</b>           |                   |           |
| 0.6495±0.0022          | 0.6486±0.0022     | 0.1391    |
| 0.6485±0.0022          |                   |           |
| 0.6477±0.0022          |                   |           |
| <b>30 mL</b>           |                   |           |
| 0.6975±0.0012          | 0.6970±0.0012     | 0.0724    |
| 0.6971±0.0012          |                   |           |
| 0.6965±0.0012          |                   |           |
| <b>32 mL</b>           |                   |           |
| 0.7331±0.0012          | 0.7325±0.0012     | 0.0702    |
| 0.7324±0.0012          |                   |           |
| 0.7321±0.0012          |                   |           |
| <b>34 mL</b>           |                   |           |
| 0.7908±0.0008          | 0.7904±0.0008     | 0.0447    |
| 0.7904±0.0008          |                   |           |
| 0.7901±0.0008          |                   |           |
| <b>36 mL</b>           |                   |           |
| 0.8225±0.0015          | 0.8218±0.0015     | 0.0740    |
| 0.8218±0.0015          |                   |           |
| 0.8213±0.0015          |                   |           |
| <b>38 mL</b>           |                   |           |
| 0.8789±0.0012          | 0.8783±0.0012     | 0.0586    |
| 0.8782±0.0012          |                   |           |
| 0.8779±0.0012          |                   |           |
| <b>40 mL</b>           |                   |           |

|               |               |        |
|---------------|---------------|--------|
| 0.9112±0.0008 | 0.9108±0.0008 | 0.0395 |
| 0.9105±0.0008 |               |        |
| 0.9109±0.0008 |               |        |
| <b>42 mL</b>  |               |        |
| 0.9653±0.0021 | 0.9645±0.0021 | 0.0883 |
| 0.9642±0.0021 |               |        |
| 0.9641±0.0021 |               |        |
| <b>44 mL</b>  |               |        |
| 1.0425±0.0012 | 1.0420±0.0012 | 0.0484 |
| 1.0421±0.0012 |               |        |
| 1.0415±0.0012 |               |        |

Trendline of T = 30°C:  $y = 0.0233x - 0.0054$  with  $R^2 = 0.9941$ .

**Table S46.** Error of adsorption solution's temperature (T = 40°C)

| <b>Optical density</b> | <b>Average OD</b> | <b>CV</b> |
|------------------------|-------------------|-----------|
| <b>26 mL</b>           |                   |           |
| 0.6088±0.0013          | 0.6085±0.0013     | 0.0907    |
| 0.6089±0.0013          |                   |           |
| 0.6079±0.0013          |                   |           |
| <b>28 mL</b>           |                   |           |
| 0.6592±0.0014          | 0.6587±0.0014     | 0.0865    |
| 0.6581±0.0014          |                   |           |
| 0.6589±0.0014          |                   |           |
| <b>30 mL</b>           |                   |           |
| 0.6991±0.0005          | 0.6992±0.0005     | 0.0335    |
| 0.6995±0.0005          |                   |           |
| 0.6991±0.0005          |                   |           |
| <b>32 mL</b>           |                   |           |
| 0.7549±0.0014          | 0.7547±0.0014     | 0.0755    |
| 0.7552±0.0014          |                   |           |
| 0.7541±0.0014          |                   |           |
| <b>34 mL</b>           |                   |           |
| 0.7932±0.0008          | 0.7928±0.0008     | 0.0445    |
| 0.7925±0.0008          |                   |           |
| 0.7928±0.0008          |                   |           |
| <b>36 mL</b>           |                   |           |
| 0.8479±0.0025          | 0.8476±0.0025     | 0.1211    |
| 0.8465±0.0025          |                   |           |
| 0.8485±0.0025          |                   |           |
| <b>38 mL</b>           |                   |           |
| 0.8897±0.0017          | 0.8890±0.0017     | 0.0791    |
| 0.8883±0.0017          |                   |           |
| 0.8891±0.0017          |                   |           |
| <b>40 mL</b>           |                   |           |



|               |               |        |
|---------------|---------------|--------|
| 0.9152±0.0008 | 0.9148±0.0008 | 0.0386 |
| 0.9145±0.0008 |               |        |
| 0.9148±0.0008 |               |        |
| <b>42 mL</b>  |               |        |
| 0.9826±0.0018 | 0.9820±0.0018 | 0.0775 |
| 0.9824±0.0018 |               |        |
| 0.9812±0.0018 |               |        |
| <b>44 mL</b>  |               |        |
| 1.0105±0.0007 | 1.0104±0.0007 | 0.0305 |
| 1.0107±0.0007 |               |        |
| 1.0101±0.0007 |               |        |

Trendline of T = 40°C:  $y = 0.0225x + 0.0292$  with  $R^2 = 0.9969$ .

**Table S47.** Error of adsorption solution's temperature (T = 50°C)

| <b>Optical density</b> | <b>Average OD</b> | <b>CV</b> |
|------------------------|-------------------|-----------|
| <b>26 mL</b>           |                   |           |
| 0.5969±0.0010          | 0.5965±0.0010     | 0.0680    |
| 0.5966±0.0010          |                   |           |
| 0.5961±0.0010          |                   |           |
| <b>28 mL</b>           |                   |           |
| 0.6448±0.0005          | 0.6450±0.0005     | 0.0328    |
| 0.6452±0.0005          |                   |           |
| 0.6451±0.0005          |                   |           |
| <b>30 mL</b>           |                   |           |
| 0.6942±0.0010          | 0.6938±0.0010     | 0.0585    |
| 0.6939±0.0010          |                   |           |
| 0.6934±0.0010          |                   |           |
| <b>32 mL</b>           |                   |           |
| 0.7281±0.0008          | 0.7277±0.0008     | 0.0445    |
| 0.7276±0.0008          |                   |           |
| 0.7275±0.0008          |                   |           |
| <b>34 mL</b>           |                   |           |
| 0.7899±0.0005          | 0.7897±0.0005     | 0.0268    |
| 0.7895±0.0005          |                   |           |
| 0.7898±0.0005          |                   |           |
| <b>36 mL</b>           |                   |           |
| 0.8431±0.0009          | 0.8429±0.0009     | 0.0421    |
| 0.8432±0.0009          |                   |           |
| 0.8425±0.0009          |                   |           |
| <b>38 mL</b>           |                   |           |
| 0.8932±0.0008          | 0.8928±0.0008     | 0.0403    |
| 0.8925±0.0008          |                   |           |
| 0.8929±0.0008          |                   |           |
| <b>40 mL</b>           |                   |           |
| 0.9582±0.0011          | 0.9579±0.0011     | 0.0484    |

|               |               |        |
|---------------|---------------|--------|
| 0.9574±0.0011 |               |        |
| 0.9582±0.0011 |               |        |
| <b>42 mL</b>  |               |        |
| 0.9917±0.0016 | 0.9915±0.0016 | 0.0672 |
| 0.9921±0.0016 |               |        |
| 0.9908±0.0016 |               |        |
| <b>44 mL</b>  |               |        |
| 1.0292±0.0010 | 1.0288±0.0010 | 0.0394 |
| 1.0288±0.0010 |               |        |
| 1.0285±0.0010 |               |        |

Trendline of T = 50°C:  $y = 0.0248x - 0.0515$  with  $R^2 = 0.9968$ .

**Table S48.** Error of adsorption solution's temperature (T = 60°C)

| <b>Optical density</b> | <b>Average OD</b> | <b>CV</b> |
|------------------------|-------------------|-----------|
| <b>26 mL</b>           |                   |           |
| 0.5977±0.0014          | 0.5975±0.0014     | 0.0954    |
| 0.5969±0.0014          |                   |           |
| 0.5980±0.0014          |                   |           |
| <b>28 mL</b>           |                   |           |
| 0.6135±0.0019          | 0.6127±0.0019     | 0.1310    |
| 0.6128±0.0019          |                   |           |
| 0.6119±0.0019          |                   |           |
| <b>30 mL</b>           |                   |           |
| 0.6679±0.0018          | 0.6670±0.0018     | 0.1111    |
| 0.6668±0.0018          |                   |           |
| 0.6665±0.0018          |                   |           |
| <b>32 mL</b>           |                   |           |
| 0.7139±0.0011          | 0.7137±0.0011     | 0.0664    |
| 0.7141±0.0011          |                   |           |
| 0.7132±0.0011          |                   |           |
| <b>34 mL</b>           |                   |           |
| 0.7692±0.0016          | 0.7686±0.0016     | 0.0867    |
| 0.7688±0.0016          |                   |           |
| 0.7679±0.0016          |                   |           |
| <b>36 mL</b>           |                   |           |
| 0.8183±0.0008          | 0.8179±0.0008     | 0.0396    |
| 0.8178±0.0008          |                   |           |
| 0.8177±0.0008          |                   |           |
| <b>38 mL</b>           |                   |           |
| 0.8789±0.0012          | 0.8784±0.0012     | 0.0591    |
| 0.8786±0.0012          |                   |           |
| 0.8779±0.0012          |                   |           |
| <b>40 mL</b>           |                   |           |
| 0.9195±0.0012          | 0.9190±0.0012     | 0.0594    |

|               |               |        |
|---------------|---------------|--------|
| 0.9191±0.0012 |               |        |
| 0.9185±0.0012 |               |        |
| <b>42 mL</b>  |               |        |
| 0.9794±0.0011 | 0.9789±0.0011 | 0.0462 |
| 0.9785±0.0011 |               |        |
| 0.9789±0.0011 |               |        |
| <b>44 mL</b>  |               |        |
| 1.0157±0.0010 | 1.0152±0.0010 | 0.0406 |
| 1.0152±0.0010 |               |        |
| 1.0149±0.0010 |               |        |

Trendline of T = 60°C:  $y = 0.0246x - 0.065$  with  $R^2 = 0.9952$ .

**Table S49.** Error of adsorption solution's temperature (T = 70°C)

| <b>Optical density</b> | <b>Average OD</b> | <b>CV</b> |
|------------------------|-------------------|-----------|
| <b>26 mL</b>           |                   |           |
| 0.5549±0.0017          | 0.5542±0.0017     | 0.1288    |
| 0.5535±0.0017          |                   |           |
| 0.5544±0.0017          |                   |           |
| <b>28 mL</b>           |                   |           |
| 0.6262±0.0013          | 0.6256±0.0013     | 0.0882    |
| 0.6256±0.0013          |                   |           |
| 0.6251±0.0013          |                   |           |
| <b>30 mL</b>           |                   |           |
| 0.6665±0.0016          | 0.6658±0.0016     | 0.0979    |
| 0.6658±0.0016          |                   |           |
| 0.6652±0.0016          |                   |           |
| <b>32 mL</b>           |                   |           |
| 0.6999±0.0005          | 0.6997±0.0005     | 0.0303    |
| 0.6995±0.0005          |                   |           |
| 0.6998±0.0005          |                   |           |
| <b>34 mL</b>           |                   |           |
| 0.7555±0.0009          | 0.7556±0.0009     | 0.0512    |
| 0.7561±0.0009          |                   |           |
| 0.7554±0.0009          |                   |           |
| <b>36 mL</b>           |                   |           |
| 0.7909±0.0020          | 0.7902±0.0020     | 0.1055    |
| 0.7905±0.0020          |                   |           |
| 0.7893±0.0020          |                   |           |
| <b>38 mL</b>           |                   |           |
| 0.8578±0.0011          | 0.8576±0.0011     | 0.0553    |
| 0.8571±0.0011          |                   |           |
| 0.8580±0.0011          |                   |           |
| <b>40 mL</b>           |                   |           |
| 0.8899±0.0016          | 0.8898±0.0016     | 0.0736    |

|               |               |        |
|---------------|---------------|--------|
| 0.8905±0.0016 |               |        |
| 0.8892±0.0016 |               |        |
| <b>42 mL</b>  |               |        |
| 0.9559±0.0010 | 0.9555±0.0010 | 0.0425 |
| 0.9551±0.0010 |               |        |
| 0.9556±0.0010 |               |        |
| <b>44 mL</b>  |               |        |
| 1.0163±0.0011 | 1.0158±0.0011 | 0.0451 |
| 1.0159±0.0011 |               |        |
| 1.0154±0.0011 |               |        |

Trendline of T = 70°C:  $y = 0.0245x - 0.0773$  with  $R^2 = 0.9947$ .

**Table S50.** Error of adsorption solution's temperature (T = 80°C)

| <b>Optical density</b> | <b>Average OD</b> | <b>CV</b> |
|------------------------|-------------------|-----------|
| <b>26 mL</b>           |                   |           |
| 0.6069±0.0013          | 0.6065±0.0013     | 0.0910    |
| 0.6068±0.0013          |                   |           |
| 0.6059±0.0013          |                   |           |
| <b>28 mL</b>           |                   |           |
| 0.6205±0.0012          | 0.6199±0.0012     | 0.0830    |
| 0.6198±0.0012          |                   |           |
| 0.6195±0.0012          |                   |           |
| <b>30 mL</b>           |                   |           |
| 0.6921±0.0011          | 0.6918±0.0011     | 0.0693    |
| 0.6919±0.0011          |                   |           |
| 0.6915±0.0011          |                   |           |
| <b>32 mL</b>           |                   |           |
| 0.7235±0.0014          | 0.7230±0.0014     | 0.0788    |
| 0.7232±0.0014          |                   |           |
| 0.7224±0.0014          |                   |           |
| <b>34 mL</b>           |                   |           |
| 0.7939±0.0008          | 0.7935±0.0008     | 0.0445    |
| 0.7932±0.0008          |                   |           |
| 0.7935±0.0008          |                   |           |
| <b>36 mL</b>           |                   |           |
| 0.8354±0.0011          | 0.8350±0.0011     | 0.0568    |
| 0.8352±0.0011          |                   |           |
| 0.8345±0.0011          |                   |           |
| <b>38 mL</b>           |                   |           |
| 0.8877±0.0012          | 0.8876±0.0012     | 0.0568    |
| 0.8881±0.0012          |                   |           |
| 0.8871±0.0012          |                   |           |
| <b>40 mL</b>           |                   |           |
| 0.9449±0.0017          | 0.9442±0.0017     | 0.0745    |



|               |               |        |
|---------------|---------------|--------|
| 0.9443±0.0017 |               |        |
| 0.9435±0.0017 |               |        |
| <b>42 mL</b>  |               |        |
| 0.9819±0.0015 | 0.9812±0.0015 | 0.0619 |
| 0.9812±0.0015 |               |        |
| 0.9807±0.0015 |               |        |
| <b>44 mL</b>  |               |        |
| 1.0655±0.0012 | 1.0650±0.0012 | 0.0474 |
| 1.0651±0.0012 |               |        |
| 1.0645±0.0012 |               |        |

Trendline of T = 80°C:  $y = 0.0256x - 0.0817$  with  $R^2 = 0.9926$ .

**Table S51.** Error of adsorption time (t = 10 minues)

| <b>Optical density</b> | <b>Average OD</b> | <b>CV</b> |
|------------------------|-------------------|-----------|
| <b>26 mL</b>           |                   |           |
| 0.6342±0.0022          | 0.6332±0.0022     | 0.1430    |
| 0.6332±0.0022          |                   |           |
| 0.6324±0.0022          |                   |           |
| <b>28 mL</b>           |                   |           |
| 0.6857±0.0021          | 0.6847±0.0021     | 0.1277    |
| 0.6840±0.0021          |                   |           |
| 0.6845±0.0021          |                   |           |
| <b>30 mL</b>           |                   |           |
| 0.7351±0.0010          | 0.7355±0.0010     | 0.0552    |
| 0.7356±0.0010          |                   |           |
| 0.7359±0.0010          |                   |           |
| <b>32 mL</b>           |                   |           |
| 0.7995±0.0016          | 0.7992±0.0016     | 0.0806    |
| 0.7985±0.0016          |                   |           |
| 0.7997±0.0016          |                   |           |
| <b>34 mL</b>           |                   |           |
| 0.8599±0.0014          | 0.8595±0.0014     | 0.0642    |
| 0.8589±0.0014          |                   |           |
| 0.8598±0.0014          |                   |           |
| <b>36 mL</b>           |                   |           |
| 0.9165±0.0007          | 0.9165±0.0007     | 0.0327    |
| 0.9162±0.0007          |                   |           |
| 0.9168±0.0007          |                   |           |
| <b>38 mL</b>           |                   |           |
| 0.9790±0.0019          | 0.9789±0.0019     | 0.0820    |
| 0.9797±0.0019          |                   |           |
| 0.9781±0.0019          |                   |           |
| <b>40 mL</b>           |                   |           |
| 1.0310±0.0008          | 1.0306±0.0008     | 0.0314    |

|               |               |        |
|---------------|---------------|--------|
| 1.0305±0.0008 |               |        |
| 1.0304±0.0008 |               |        |
| <b>42 mL</b>  |               |        |
| 1.0879±0.0005 | 1.0876±0.0005 | 0.0205 |
| 1.0876±0.0005 |               |        |
| 1.0875±0.0005 |               |        |
| <b>44 mL</b>  |               |        |
| 1.1121±0.0001 | 1.1120±0.0001 | 0.0063 |
| 1.1120±0.0001 |               |        |
| 1.1120±0.0001 |               |        |

Trendline of  $t = 10$  minutes:  $y = 0.0297x - 0.0921$  with  $R^2 = 0.9965$ .

**Table S52.** Error of adsorption time (t = 20 minues)

| <b>Optical density</b> | <b>Average OD</b> | <b>CV</b> |
|------------------------|-------------------|-----------|
| <b>26 mL</b>           |                   |           |
| 0.7093±0.0003          | 0.7093±0.0003     | 0.0222    |
| 0.7095±0.0003          |                   |           |
| 0.7092±0.0003          |                   |           |
| <b>28 mL</b>           |                   |           |
| 0.7995±0.0011          | 0.7991±0.0011     | 0.0593    |
| 0.7986±0.0011          |                   |           |
| 0.7993±0.0011          |                   |           |
| <b>30 mL</b>           |                   |           |
| 0.8519±0.0003          | 0.8517±0.0003     | 0.0185    |
| 0.8516±0.0003          |                   |           |
| 0.8517±0.0003          |                   |           |
| <b>32 mL</b>           |                   |           |
| 0.8889±0.0006          | 0.8889±0.0006     | 0.0286    |
| 0.8887±0.0006          |                   |           |
| 0.8892±0.0006          |                   |           |
| <b>34 mL</b>           |                   |           |
| 0.9435±0.0023          | 0.9432±0.0023     | 0.0986    |
| 0.9422±0.0023          |                   |           |
| 0.9440±0.0023          |                   |           |
| <b>36 mL</b>           |                   |           |
| 0.9975±0.0023          | 0.9965±0.0023     | 0.0954    |
| 0.9956±0.0023          |                   |           |
| 0.9965±0.0023          |                   |           |
| <b>38 mL</b>           |                   |           |
| 1.0536±0.0023          | 1.0533±0.0023     | 0.0883    |
| 1.0541±0.0023          |                   |           |
| 1.0523±0.0023          |                   |           |
| <b>40 mL</b>           |                   |           |
| 1.1015±0.0011          | 1.1016±0.0011     | 0.0435    |

|               |               |        |
|---------------|---------------|--------|
| 1.1022±0.0011 |               |        |
| 1.1013±0.0011 |               |        |
| <b>42 mL</b>  |               |        |
| 1.1542±0.0028 | 1.1540±0.0028 | 0.1004 |
| 1.1551±0.0028 |               |        |
| 1.1528±0.0028 |               |        |
| <b>44 mL</b>  |               |        |
| 1.1895±0.0012 | 1.1899±0.0012 | 0.0432 |
| 1.1898±0.0012 |               |        |
| 1.1905±0.0012 |               |        |

Trendline of t = 20 minutes:  $y = 0.0261x + 0.056$  with  $R^2 = 0.9947$ .

**Table S53.** Error of adsorption time (t = 30 minues)

| <b>Optical density</b> | <b>Average OD</b> | <b>CV</b> |
|------------------------|-------------------|-----------|
| <b>26 mL</b>           |                   |           |
| 0.6128±0.0022          | 0.6126±0.0022     | 0.1487    |
| 0.6135±0.0022          |                   |           |
| 0.6117±0.0022          |                   |           |
| <b>28 mL</b>           |                   |           |
| 0.6549±0.0016          | 0.6548±0.0016     | 0.1001    |
| 0.6542±0.0016          |                   |           |
| 0.6555±0.0016          |                   |           |
| <b>30 mL</b>           |                   |           |
| 0.6925±0.0026          | 0.6924±0.0026     | 0.1521    |
| 0.6935±0.0026          |                   |           |
| 0.6914±0.0026          |                   |           |
| <b>32 mL</b>           |                   |           |
| 0.7536±0.0024          | 0.7535±0.0024     | 0.1330    |
| 0.7545±0.0024          |                   |           |
| 0.7525±0.0024          |                   |           |
| <b>34 mL</b>           |                   |           |
| 0.7955±0.0026          | 0.7952±0.0026     | 0.1348    |
| 0.7962±0.0026          |                   |           |
| 0.7941±0.0026          |                   |           |
| <b>36 mL</b>           |                   |           |
| 0.8288±0.0005          | 0.8287±0.0005     | 0.0255    |
| 0.8289±0.0005          |                   |           |
| 0.8285±0.0005          |                   |           |
| <b>38 mL</b>           |                   |           |
| 0.8694±0.0011          | 0.8689±0.0011     | 0.0521    |
| 0.8685±0.0011          |                   |           |
| 0.8689±0.0011          |                   |           |
| <b>40 mL</b>           |                   |           |
| 0.9471±0.0016          | 0.9471±0.0016     | 0.0688    |

|               |               |        |
|---------------|---------------|--------|
| 0.9478±0.0016 |               |        |
| 0.9465±0.0016 |               |        |
| <b>42 mL</b>  |               |        |
| 0.9835±0.0039 | 0.9827±0.0039 | 0.1623 |
| 0.9838±0.0039 |               |        |
| 0.9809±0.0039 |               |        |
| <b>44 mL</b>  |               |        |
| 1.0211±0.0012 | 1.0205±0.0012 | 0.0485 |
| 1.0202±0.0012 |               |        |
| 1.0203±0.0012 |               |        |

Trendline of t = 30 minutes:  $y = 0.0231x + 0.0075$  with  $R^2 = 0.9955$ .

**Table S54.** Error of adsorption time (t = 40 minues)

| <b>Optical density</b> | <b>Average OD</b> | <b>CV</b> |
|------------------------|-------------------|-----------|
| <b>26 mL</b>           |                   |           |
| 0.6088±0.0016          | 0.6081±0.0016     | 0.1072    |
| 0.6075±0.0016          |                   |           |
| 0.6081±0.0016          |                   |           |
| <b>28 mL</b>           |                   |           |
| 0.6625±0.0055          | 0.6599±0.0055     | 0.3390    |
| 0.6589±0.0055          |                   |           |
| 0.6584±0.0055          |                   |           |
| <b>30 mL</b>           |                   |           |
| 0.6906±0.0032          | 0.6895±0.0032     | 0.1907    |
| 0.6885±0.0032          |                   |           |
| 0.6895±0.0032          |                   |           |
| <b>32 mL</b>           |                   |           |
| 0.7475±0.0022          | 0.7474±0.0022     | 0.1207    |
| 0.7483±0.0022          |                   |           |
| 0.7465±0.0022          |                   |           |
| <b>34 mL</b>           |                   |           |
| 0.7802±0.0076          | 0.7801±0.0076     | 0.0395    |
| 0.7804±0.0076          |                   |           |
| 0.7798±0.0076          |                   |           |
| <b>36 mL</b>           |                   |           |
| 0.8310±0.0024          | 0.8298±0.0024     | 0.1211    |
| 0.8295±0.0024          |                   |           |
| 0.8291±0.0024          |                   |           |
| <b>38 mL</b>           |                   |           |
| 0.8820±0.0020          | 0.8825±0.0020     | 0.0951    |
| 0.8835±0.0020          |                   |           |
| 0.8821±0.0020          |                   |           |
| <b>40 mL</b>           |                   |           |
| 0.9395±0.0004          | 0.9396±0.0004     | 0.0184    |



|               |               |        |
|---------------|---------------|--------|
| 0.9398±0.0004 |               |        |
| 0.9397±0.0004 |               |        |
| <b>42 mL</b>  |               |        |
| 0.9715±0.0021 | 0.9714±0.0021 | 0.0879 |
| 0.9723±0.0021 |               |        |
| 0.9706±0.0021 |               |        |
| <b>44 mL</b>  |               |        |
| 1.0382±0.0016 | 1.0375±0.0016 | 0.0628 |
| 1.0375±0.0016 |               |        |
| 1.0369±0.0016 |               |        |

Trendline of t = 40 minutes:  $y = 0.0235x - 0.0075$  with  $R^2 = 0.9965$ .

**Table S55.** Error of adsorption time (t = 50 minues)

| <b>Optical density</b> | <b>Average OD</b> | <b>CV</b> |
|------------------------|-------------------|-----------|
| <b>26 mL</b>           |                   |           |
| 0.6059±0.0016          | 0.6053±0.0016     | 0.1102    |
| 0.6046±0.0016          |                   |           |
| 0.6055±0.0016          |                   |           |
| <b>28 mL</b>           |                   |           |
| 0.6505±0.0017          | 0.6502±0.0017     | 0.1054    |
| 0.6495±0.0017          |                   |           |
| 0.6508±0.0017          |                   |           |
| <b>30 mL</b>           |                   |           |
| 0.6952±0.003           | 0.6940±0.003      | 0.1741    |
| 0.6942±0.003           |                   |           |
| 0.6928±0.003           |                   |           |
| <b>32 mL</b>           |                   |           |
| 0.7425±0.0016          | 0.7418±0.0016     | 0.0883    |
| 0.7419±0.0016          |                   |           |
| 0.7412±0.0016          |                   |           |
| <b>34 mL</b>           |                   |           |
| 0.7905±0.0008          | 0.7901±0.0008     | 0.0447    |
| 0.7898±0.0008          |                   |           |
| 0.7901±0.0008          |                   |           |
| <b>36 mL</b>           |                   |           |
| 0.8219±0.0018          | 0.8213±0.0018     | 0.0898    |
| 0.8205±0.0018          |                   |           |
| 0.8216±0.0018          |                   |           |
| <b>38 mL</b>           |                   |           |
| 0.8735±0.0018          | 0.8733±0.0018     | 0.00875   |
| 0.8725±0.0018          |                   |           |
| 0.8740±0.0018          |                   |           |
| <b>40 mL</b>           |                   |           |
| 0.9104±0.0013          | 0.9109±0.0013     | 0.0606    |

|               |               |        |
|---------------|---------------|--------|
| 0.9115±0.0013 |               |        |
| 0.9109±0.0013 |               |        |
| <b>42 mL</b>  |               |        |
| 0.9642±0.0012 | 0.9636±0.0012 | 0.0534 |
| 0.9632±0.0012 |               |        |
| 0.9635±0.0012 |               |        |
| <b>44 mL</b>  |               |        |
| 1.0505±0.0017 | 1.0502±0.0017 | 0.0652 |
| 1.0495±0.0017 |               |        |
| 1.0508±0.0017 |               |        |

Trendline of t = 50 minutes:  $y = 0.0234x - 0.0075$  with  $R^2 = 0.9917$ .

**Table S56.** Error of adsorption time (t = 60 minues)

| <b>Optical density</b> | <b>Average OD</b> | <b>CV</b> |
|------------------------|-------------------|-----------|
| <b>26 mL</b>           |                   |           |
| 0.6030±0.0012          | 0.6033±0.0012     | 0.0820    |
| 0.6039±0.0012          |                   |           |
| 0.6031±0.0012          |                   |           |
| <b>28 mL</b>           |                   |           |
| 0.6489±0.0042          | 0.6486±0.0042     | 0.2645    |
| 0.6468±0.0042          |                   |           |
| 0.6502±0.0042          |                   |           |
| <b>30 mL</b>           |                   |           |
| 0.6975±0.0012          | 0.6970±0.0012     | 0.0724    |
| 0.6965±0.0012          |                   |           |
| 0.6971±0.0012          |                   |           |
| <b>32 mL</b>           |                   |           |
| 0.7329±0.0017          | 0.7325±0.0017     | 0.0989    |
| 0.7330±0.0017          |                   |           |
| 0.7317±0.0017          |                   |           |
| <b>34 mL</b>           |                   |           |
| 0.7909±0.0036          | 0.7904±0.0036     | 0.1865    |
| 0.7915±0.0036          |                   |           |
| 0.7887±0.0036          |                   |           |
| <b>36 mL</b>           |                   |           |
| 0.8228±0.0023          | 0.8218±0.0023     | 0.1157    |
| 0.8209±0.0023          |                   |           |
| 0.8218±0.0023          |                   |           |
| <b>38 mL</b>           |                   |           |
| 0.8784±0.0010          | 0.8783±0.0010     | 0.0462    |
| 0.8787±0.0010          |                   |           |
| 0.8779±0.0010          |                   |           |
| <b>40 mL</b>           |                   |           |
| 0.9109±0.0016          | 0.9108±0.0016     | 0.0719    |

|                |               |        |
|----------------|---------------|--------|
| 0.9102±0.0016  |               |        |
| 0.9115±0.0016  |               |        |
| <b>42 mL</b>   |               |        |
| 0.9657±0.00027 | 0.9645±0.0027 | 0.1147 |
| 0.9644±0.0027  |               |        |
| 0.9635±0.0027  |               |        |
| <b>44 mL</b>   |               |        |
| 1.0415±0.0022  | 1.0420±0.0022 | 0.0887 |
| 1.0431±0.0022  |               |        |
| 1.0415±0.0022  |               |        |

Trendline of t = 60 minutes:  $y = 0.0233x - 0.0075$  with  $R^2 = 0.9943$ .

**Table S57.** Error of speed of centrifugal shaker (80RPM)

| <b>Optical density</b> | <b>Average OD</b> | <b>CV</b> |
|------------------------|-------------------|-----------|
| <b>26 mL</b>           |                   |           |
| 0.6092±0.0006          | 0.6089±0.0006     | 0.0418    |
| 0.6087±0.0006          |                   |           |
| 0.6089±0.0006          |                   |           |
| <b>28 mL</b>           |                   |           |
| 0.6479±0.0008          | 0.6478±0.0008     | 0.0556    |
| 0.6475±0.0008          |                   |           |
| 0.6482±0.0008          |                   |           |
| <b>30 mL</b>           |                   |           |
| 0.6979±0.0017          | 0.6972±0.0017     | 0.1009    |
| 0.6973±0.0017          |                   |           |
| 0.6965±0.0017          |                   |           |
| <b>32 mL</b>           |                   |           |
| 0.7477±0.0006          | 0.7474±0.0006     | 0.0353    |
| 0.7472±0.0006          |                   |           |
| 0.7475±0.0006          |                   |           |
| <b>34 mL</b>           |                   |           |
| 0.7963±0.0008          | 0.7959±0.0008     | 0.0407    |
| 0.7958±0.0008          |                   |           |
| 0.7957±0.0008          |                   |           |
| <b>36 mL</b>           |                   |           |
| 0.8302±0.0008          | 0.8303±0.0008     | 0.0390    |
| 0.8301±0.0008          |                   |           |
| 0.8307±0.0008          |                   |           |
| <b>38 mL</b>           |                   |           |
| 0.8839±0.0010          | 0.8838±0.0010     | 0.0459    |
| 0.8834±0.0010          |                   |           |
| 0.8842±0.0010          |                   |           |
| <b>40 mL</b>           |                   |           |
| 0.9285±0.0008          | 0.9281±0.0008     | 0.0380    |

|               |               |        |
|---------------|---------------|--------|
| 0.9281±0.0008 |               |        |
| 0.9278±0.0008 |               |        |
| <b>42 mL</b>  |               |        |
| 0.9712±0.0008 | 0.9708±0.0008 | 0.0364 |
| 0.9708±0.0008 |               |        |
| 0.9705±0.0008 |               |        |
| <b>44 mL</b>  |               |        |
| 1.0282±0.0016 | 1.0280±0.0016 | 0.0648 |
| 1.0286±0.0016 |               |        |
| 1.0273±0.0016 |               |        |

Trendlin of 80RPM:  $y = 0.0231x + 0.0045$  with  $R^2 = 0.9990$ .

**Table S58.** Error of speed of centrifugal shaker (160RPM)

| <b>Optical density</b> | <b>Average OD</b> | <b>CV</b> |
|------------------------|-------------------|-----------|
| <b>26 mL</b>           |                   |           |
| 0.6032±0.0010          | 0.6027±0.0010     | 0.0694    |
| 0.6024±0.0010          |                   |           |
| 0.6026±0.0010          |                   |           |
| <b>28 mL</b>           |                   |           |
| 0.6410±0.0010          | 0.6405±0.0010     | 0.0653    |
| 0.6404±0.0010          |                   |           |
| 0.6402±0.0010          |                   |           |
| <b>30 mL</b>           |                   |           |
| 0.6912±0.0012          | 0.6906±0.0012     | 0.0716    |
| 0.6904±0.0012          |                   |           |
| 0.6903±0.0012          |                   |           |
| <b>32 mL</b>           |                   |           |
| 0.7223±0.0018          | 0.7215±0.0018     | 0.1041    |
| 0.7215±0.0018          |                   |           |
| 0.7208±0.0018          |                   |           |
| <b>34 mL</b>           |                   |           |
| 0.7729±0.0014          | 0.7722±0.0014     | 0.0744    |
| 0.7721±0.0014          |                   |           |
| 0.7718±0.0014          |                   |           |
| <b>36 mL</b>           |                   |           |
| 0.8122±0.0009          | 0.8119±0.0009     | 0.0469    |
| 0.8115±0.0009          |                   |           |
| 0.8121±0.0009          |                   |           |
| <b>38 mL</b>           |                   |           |
| 0.8711±0.0008          | 0.8707±0.0008     | 0.0406    |
| 0.8704±0.0008          |                   |           |
| 0.8707±0.0008          |                   |           |
| <b>40 mL</b>           |                   |           |
| 0.9108±0.0009          | 0.9105±0.0009     | 0.0418    |



|               |               |        |
|---------------|---------------|--------|
| 0.9101±0.0009 |               |        |
| 0.9107±0.0009 |               |        |
| <b>42 mL</b>  |               |        |
| 0.9668±0.0018 | 0.9665±0.0018 | 0.0763 |
| 0.9671±0.0018 |               |        |
| 0.9657±0.0018 |               |        |
| <b>44 mL</b>  |               |        |
| 1.0218±0.0008 | 1.0214±0.0008 | 0.0353 |
| 1.0215±0.0008 |               |        |
| 1.0211±0.0008 |               |        |

Trendline of 160RPM:  $y = 0.0231x - 0.0091$  with  $R^2 = 0.9966$ .

**Table S59.** Error of speed of centrifugal shaker (240RPM)

| <b>Optical density</b> | <b>Average OD</b> | <b>CV</b> |
|------------------------|-------------------|-----------|
| <b>26 mL</b>           |                   |           |
| 0.5815±0.0013          | 0.5809±0.0013     | 0.0950    |
| 0.5804±0.0013          |                   |           |
| 0.5809±0.0013          |                   |           |
| <b>28 mL</b>           |                   |           |
| 0.6243±0.0013          | 0.6237±0.0013     | 0.0885    |
| 0.6237±0.0013          |                   |           |
| 0.6232±0.0013          |                   |           |
| <b>30 mL</b>           |                   |           |
| 0.6741±0.0012          | 0.6740±0.0012     | 0.0749    |
| 0.6745±0.0012          |                   |           |
| 0.6735±0.0012          |                   |           |
| <b>32 mL</b>           |                   |           |
| 0.7212±0.0008          | 0.7208±0.0008     | 0.0490    |
| 0.7208±0.0008          |                   |           |
| 0.7205±0.0008          |                   |           |
| <b>34 mL</b>           |                   |           |
| 0.7729±0.0012          | 0.7724±0.0012     | 0.0653    |
| 0.7719±0.0012          |                   |           |
| 0.7725±0.0012          |                   |           |
| <b>36 mL</b>           |                   |           |
| 0.8349±0.0015          | 0.8342±0.0015     | 0.0729    |
| 0.8342±0.0015          |                   |           |
| 0.8337±0.0015          |                   |           |
| <b>38 mL</b>           |                   |           |
| 0.8729±0.0016          | 0.8722±0.0016     | 0.0747    |
| 0.8722±0.0016          |                   |           |
| 0.8716±0.0016          |                   |           |
| <b>40 mL</b>           |                   |           |
| 0.9339±0.0014          | 0.9332±0.0014     | 0.0615    |

|               |               |        |
|---------------|---------------|--------|
| 0.9331±0.0014 |               |        |
| 0.9328±0.0014 |               |        |
| <b>42 mL</b>  |               |        |
| 0.9789±0.0018 | 0.9780±0.0018 | 0.0758 |
| 0.9778±0.0018 |               |        |
| 0.9775±0.0018 |               |        |
| <b>44 mL</b>  |               |        |
| 1.0232±0.0015 | 1.0225±0.0015 | 0.0598 |
| 1.0224±0.0015 |               |        |
| 1.0220±0.0015 |               |        |

Trendline of 240RPM:  $y = 0.0251x - 0.0756$  with  $R^2 = 0.9989$ .

**Table S60.** Error of speed of centrifugal shaker (320RPM)

| <b>Optical density</b> | <b>Average OD</b> | <b>CV</b> |
|------------------------|-------------------|-----------|
| <b>26 mL</b>           |                   |           |
| 0.5709±0.0008          | 0.5706±0.0008     | 0.0619    |
| 0.5702±0.0008          |                   |           |
| 0.5706±0.0008          |                   |           |
| <b>28 mL</b>           |                   |           |
| 0.6172±0.0006          | 0.6169±0.0006     | 0.0413    |
| 0.6167±0.0006          |                   |           |
| 0.6169±0.0006          |                   |           |
| <b>30 mL</b>           |                   |           |
| 0.6623±0.0006          | 0.6620±0.0006     | 0.0385    |
| 0.6618±0.0006          |                   |           |
| 0.6620±0.0006          |                   |           |
| <b>32 mL</b>           |                   |           |
| 0.7051±0.0019          | 0.7043±0.0019     | 0.1140    |
| 0.7044±0.0019          |                   |           |
| 0.7035±0.0019          |                   |           |
| <b>34 mL</b>           |                   |           |
| 0.7552±0.0012          | 0.7546±0.0012     | 0.0675    |
| 0.7546±0.0012          |                   |           |
| 0.7542±0.0012          |                   |           |
| <b>36 mL</b>           |                   |           |
| 0.7995±0.0056          | 0.7990±0.0056     | 0.2867    |
| 0.7991±0.0056          |                   |           |
| 0.7985±0.0056          |                   |           |
| <b>38 mL</b>           |                   |           |
| 0.8569±0.0011          | 0.8564±0.0011     | 0.0528    |
| 0.8560±0.0011          |                   |           |
| 0.8564±0.0011          |                   |           |
| <b>40 mL</b>           |                   |           |
| 0.8973±0.0008          | 0.8969±0.0008     | 0.0394    |

|               |               |        |
|---------------|---------------|--------|
| 0.8969±0.0008 |               |        |
| 0.8966±0.0008 |               |        |
| <b>42 mL</b>  |               |        |
| 0.9486±0.0008 | 0.9487±0.0008 | 0.0341 |
| 0.9491±0.0008 |               |        |
| 0.9485±0.0008 |               |        |
| <b>44 mL</b>  |               |        |
| 1.0234±0.0008 | 1.0230±0.0008 | 0.0345 |
| 1.0227±0.0008 |               |        |
| 1.0230±0.0008 |               |        |

Trendline of 320RPM:  $y = 0.0245x - 0.0726$  with  $R^2 = 0.9965$ .

**Table S61.** Error of order of reaction at  $[\text{Cu}^{2+}] = 100 \text{ g mL}^{-1}$  in 10 minutes

| <b>Optical density</b> | <b>Average OD</b> | <b>CV</b> |
|------------------------|-------------------|-----------|
| <b>30 mL</b>           |                   |           |
| 0.6918±0.0012          | 0.6912±0.0012     | 0.0716    |
| 0.6909±0.0012          |                   |           |
| 0.6910±0.0012          |                   |           |
| <b>32 mL</b>           |                   |           |
| 0.7521±0.0008          | 0.7517±0.0008     | 0.0431    |
| 0.7515±0.0008          |                   |           |
| 0.7516±0.0008          |                   |           |
| <b>34 mL</b>           |                   |           |
| 0.8061±0.0012          | 0.8055±0.0012     | 0.0639    |
| 0.8051±0.0012          |                   |           |
| 0.8054±0.0012          |                   |           |
| <b>36 mL</b>           |                   |           |
| 0.8541±0.0012          | 0.8545±0.0012     | 0.0602    |
| 0.8544±0.0012          |                   |           |
| 0.8551±0.0012          |                   |           |
| <b>38 mL</b>           |                   |           |
| 0.9010±0.0012          | 0.9005±0.0012     | 0.0560    |
| 0.9006±0.0012          |                   |           |
| 0.9000±0.0012          |                   |           |

Trendline:  $y = 0.0261x - 0.0857$  with  $R^2 = 0.9970$ .

**Table S62.** Error of order of reaction at  $[\text{Cu}^{2+}] = 100 \text{ g mL}^{-1}$  in 15 minutes

| <b>Optical density</b> | <b>Average OD</b> | <b>CV</b> |
|------------------------|-------------------|-----------|
| <b>30 mL</b>           |                   |           |
| 0.6931±0.0027          | 0.6938±0.0027     | 0.1588    |
| 0.6933±0.0027          |                   |           |
| 0.6951±0.0027          |                   |           |
| <b>32 mL</b>           |                   |           |
| 0.7533±0.0009          | 0.7537±0.0009     | 0.0505    |
| 0.7539±0.0009          |                   |           |
| 0.7540±0.0009          |                   |           |
| <b>34 mL</b>           |                   |           |
| 0.8088±0.0009          | 0.8085±0.0009     | 0.0470    |
| 0.8081±0.0009          |                   |           |
| 0.8087±0.0009          |                   |           |
| <b>36 mL</b>           |                   |           |
| 0.8522±0.0010          | 0.8525±0.0010     | 0.0490    |
| 0.8530±0.0010          |                   |           |
| 0.8524±0.0010          |                   |           |
| <b>38 mL</b>           |                   |           |
| 0.9019±0.0010          | 0.9014±0.0010     | 0.0464    |
| 0.9011±0.0010          |                   |           |
| 0.9013±0.0010          |                   |           |

Trendline:  $y = 0.0257x - 0.0718$  with  $R^2 = 0.9965$ .

**Table S63.** Error of order of reaction at  $[\text{Cu}^{2+}] = 100 \text{ g mL}^{-1}$  in 20 minutes

| <b>Optical density</b> | <b>Average OD</b> | <b>CV</b> |
|------------------------|-------------------|-----------|
| <b>30 mL</b>           |                   |           |
| 0.7119±0.0017          | 0.7111±0.0017     | 0.0999    |
| 0.7110±0.0017          |                   |           |
| 0.7105±0.0017          |                   |           |
| <b>32 mL</b>           |                   |           |
| 0.7692±0.0015          | 0.7688±0.0015     | 0.0827    |
| 0.7681±0.0015          |                   |           |
| 0.7692±0.0015          |                   |           |
| <b>34 mL</b>           |                   |           |
| 0.8151±0.0007          | 0.8148±0.0007     | 0.0378    |
| 0.8145±0.0007          |                   |           |
| 0.8149±0.0007          |                   |           |
| <b>36 mL</b>           |                   |           |
| 0.8619±0.0010          | 0.8614±0.0010     | 0.0485    |
| 0.8611±0.0010          |                   |           |
| 0.8613±0.0010          |                   |           |
| <b>38 mL</b>           |                   |           |
| 0.9200±0.0016          | 0.9207±0.0016     | 0.0724    |
| 0.9209±0.0016          |                   |           |
| 0.9213±0.0016          |                   |           |

Trendline  $y = 0.0256x - 0.0547$  with  $R^2 = 0.9977$ .



**Table S64.** Error of order of reaction at  $[\text{Cu}^{2+}] = 100 \text{ g mL}^{-1}$  in 25 minutes

| <b>Optical density</b> | <b>Average OD</b> | <b>CV</b> |
|------------------------|-------------------|-----------|
| <b>30 mL</b>           |                   |           |
| 0.7288±0.0016          | 0.7281±0.0016     | 0.0895    |
| 0.7281±0.0016          |                   |           |
| 0.7275±0.0016          |                   |           |
| <b>32 mL</b>           |                   |           |
| 0.7782±0.0015          | 0.7778±0.0015     | 0.0818    |
| 0.7771±0.0015          |                   |           |
| 0.7782±0.0015          |                   |           |
| <b>34 mL</b>           |                   |           |
| 0.8299±0.0017          | 0.8298±0.0017     | 0.0847    |
| 0.8291±0.0017          |                   |           |
| 0.8305±0.0017          |                   |           |
| <b>36 mL</b>           |                   |           |
| 0.8810±0.0012          | 0.8804±0.0012     | 0.0562    |
| 0.8801±0.0012          |                   |           |
| 0.8802±0.0012          |                   |           |
| <b>38 mL</b>           |                   |           |
| 0.9301±0.0014          | 0.9307±0.0014     | 0.0612    |
| 0.9309±0.0014          |                   |           |
| 0.9312±0.0014          |                   |           |

Trendline:  $y = 0.0254x - 0.0339$  with  $R^2 = 0.9999$ .

**Table S65.** Error of order of reaction at  $[\text{Cu}^{2+}] = 100 \text{ g mL}^{-1}$  in 30 minutes

| <b>Optical density</b> | <b>Average OD</b> | <b>CV</b> |
|------------------------|-------------------|-----------|
| <b>30 mL</b>           |                   |           |
| 0.7288±0.0016          | 0.7281±0.0016     | 0.0895    |
| 0.7281±0.0016          |                   |           |
| 0.7275±0.0016          |                   |           |
| <b>32 mL</b>           |                   |           |
| 0.7782±0.0015          | 0.7778±0.0015     | 0.0818    |
| 0.7771±0.0015          |                   |           |
| 0.7782±0.0015          |                   |           |
| <b>34 mL</b>           |                   |           |
| 0.8299±0.0017          | 0.8298±0.0017     | 0.0847    |
| 0.8291±0.0017          |                   |           |
| 0.8305±0.0017          |                   |           |
| <b>36 mL</b>           |                   |           |
| 0.8810±0.0012          | 0.8804±0.0012     | 0.0562    |
| 0.8801±0.0012          |                   |           |
| 0.8802±0.0012          |                   |           |
| <b>38 mL</b>           |                   |           |
| 0.9301±0.0014          | 0.9307±0.0014     | 0.0612    |
| 0.9309±0.0014          |                   |           |
| 0.9312±0.0014          |                   |           |

Trendline:  $y = 0.024x + 0.0044$  with  $R^2 = 0.9990$ .

**Table S66.** Error of order of reaction at  $[\text{Cu}^{2+}] = 75 \text{ g mL}^{-1}$  in 10 minutes

| <b>Optical density</b> | <b>Average OD</b> | <b>CV</b> |
|------------------------|-------------------|-----------|
| <b>30 mL</b>           |                   |           |
| 0.7089±0.0010          | 0.7085±0.0010     | 0.0573    |
| 0.7081±0.0010          |                   |           |
| 0.7086±0.0010          |                   |           |
| <b>32 mL</b>           |                   |           |
| 0.7550±0.0027          | 0.7541±0.0027     | 0.1455    |
| 0.7545±0.0027          |                   |           |
| 0.7529±0.0027          |                   |           |
| <b>34 mL</b>           |                   |           |
| 0.8055±0.0022          | 0.8051±0.0022     | 0.1128    |
| 0.8058±0.0022          |                   |           |
| 0.8041±0.0021          |                   |           |
| <b>36 mL</b>           |                   |           |
| 0.8520±0.0017          | 0.8519±0.0017     | 0.0825    |
| 0.8512±0.0017          |                   |           |
| 0.8526±0.0017          |                   |           |
| <b>38 mL</b>           |                   |           |
| 0.9159±0.0010          | 0.9154±0.0010     | 0.0456    |
| 0.9151±0.0010          |                   |           |
| 0.9153±0.0010          |                   |           |

Trendline  $y = 0.0256x - 0.0627$  with  $R^2 = 0.9963$ .

**Table S67.** Error of order of reaction at  $[\text{Cu}^{2+}] = 75 \text{ g mL}^{-1}$  in 15 minutes

| <b>Optical density</b> | <b>Average OD</b> | <b>CV</b> |
|------------------------|-------------------|-----------|
| <b>30 mL</b>           |                   |           |
| 0.6966±0.0012          | 0.6961±0.0012     | 0.0725    |
| 0.6962±0.0012          |                   |           |
| 0.6956±0.0012          |                   |           |
| <b>32 mL</b>           |                   |           |
| 0.7489±0.0019          | 0.7480±0.0019     | 0.1039    |
| 0.7474±0.0019          |                   |           |
| 0.7478±0.0019          |                   |           |
| <b>34 mL</b>           |                   |           |
| 0.8028±0.0008          | 0.8024±0.0008     | 0.0403    |
| 0.8022±0.0008          |                   |           |
| 0.8023±0.0008          |                   |           |
| <b>36 mL</b>           |                   |           |
| 0.8559±0.0010          | 0.8554±0.0010     | 0.0489    |
| 0.8551±0.0010          |                   |           |
| 0.8553±0.0010          |                   |           |
| <b>38 mL</b>           |                   |           |
| 0.8922±0.0014          | 0.8928±0.0014     | 0.0638    |
| 0.8933±0.0014          |                   |           |
| 0.8930±0.0014          |                   |           |

Trendline:  $y = 0.025x - 0.0524$  with  $R^2 = 0.9960$ .

**Table S68.** Error of order of reaction at  $[\text{Cu}^{2+}] = 75 \text{ g mL}^{-1}$  in 20 minutes

| <b>Optical density</b> | <b>Average OD</b> | <b>CV</b> |
|------------------------|-------------------|-----------|
| <b>30 mL</b>           |                   |           |
| 0.6988±0.0008          | 0.6984±0.0008     | 0.0506    |
| 0.6981±0.0008          |                   |           |
| 0.6984±0.0008          |                   |           |
| <b>32 mL</b>           |                   |           |
| 0.7612±0.0014          | 0.7607±0.0014     | 0.0749    |
| 0.7601±0.0014          |                   |           |
| 0.7609±0.0014          |                   |           |
| <b>34 mL</b>           |                   |           |
| 0.8018±0.0008          | 0.8014±0.0008     | 0.0404    |
| 0.8012±0.0008          |                   |           |
| 0.8013±0.0008          |                   |           |
| <b>36 mL</b>           |                   |           |
| 0.8621±0.0003          | 0.8619±0.0003     | 0.0183    |
| 0.8618±0.0003          |                   |           |
| 0.8619±0.0003          |                   |           |
| <b>38 mL</b>           |                   |           |
| 0.8961±0.0010          | 0.8965±0.0010     | 0.0453    |
| 0.8969±0.0010          |                   |           |
| 0.8966±0.0010          |                   |           |

Trendline  $y = 0.0249x - 0.0418$  with  $R^2 = 0.9920$ .

**Table S69.** Error of order of reaction at  $[\text{Cu}^{2+}] = 75 \text{ g mL}^{-1}$  in 25 minutes

| <b>Optical density</b> | <b>Average OD</b> | <b>CV</b> |
|------------------------|-------------------|-----------|
| <b>30 mL</b>           |                   |           |
| 0.7100±0.0023          | 0.7107±0.0023     | 0.1331    |
| 0.7104±0.0023          |                   |           |
| 0.7118±0.0023          |                   |           |
| <b>32 mL</b>           |                   |           |
| 0.7655±0.0020          | 0.7652±0.0020     | 0.1089    |
| 0.7659±0.0020          |                   |           |
| 0.7643±0.0020          |                   |           |
| <b>34 mL</b>           |                   |           |
| 0.8099±0.0023          | 0.8091±0.0023     | 0.1149    |
| 0.8094±0.0023          |                   |           |
| 0.8081±0.0023          |                   |           |
| <b>36 mL</b>           |                   |           |
| 0.8577±0.0009          | 0.8575±0.0009     | 0.0444    |
| 0.8571±0.0009          |                   |           |
| 0.8578±0.0009          |                   |           |
| <b>38 mL</b>           |                   |           |
| 0.8958±0.0018          | 0.8952±0.0018     | 0.0824    |
| 0.8955±0.0018          |                   |           |
| 0.8944±0.0018          |                   |           |

Trendline:  $y = 0.0231x + 0.0233$  with  $R^2 = 0.9966$ .

**Table S70.** Error of order of reaction at  $[\text{Cu}^{2+}] = 75 \text{ g mL}^{-1}$  in 30 minutes

| <b>Optical density</b> | <b>Average OD</b> | <b>CV</b> |
|------------------------|-------------------|-----------|
| <b>30 mL</b>           |                   |           |
| 0.6829±0.0010          | 0.6824±0.0010     | 0.0595    |
| 0.6822±0.0010          |                   |           |
| 0.6822±0.0010          |                   |           |
| <b>32 mL</b>           |                   |           |
| 0.7401±0.0021          | 0.7407±0.0021     | 0.1149    |
| 0.7404±0.0021          |                   |           |
| 0.7417±0.0021          |                   |           |
| <b>34 mL</b>           |                   |           |
| 0.7844±0.0005          | 0.7843±0.0005     | 0.0270    |
| 0.7841±0.0005          |                   |           |
| 0.7845±0.0005          |                   |           |
| <b>36 mL</b>           |                   |           |
| 0.8349±0.0010          | 0.8345±0.0010     | 0.0486    |
| 0.8341±0.0010          |                   |           |
| 0.8346±0.0010          |                   |           |
| <b>38 mL</b>           |                   |           |
| 0.8661±0.0012          | 0.8663±0.0012     | 0.0571    |
| 0.8669±0.0012          |                   |           |
| 0.8660±0.0012          |                   |           |

Trendline  $y = 0.0231x - 0.0031$  with  $R^2 = 0.9914$ .

**Table S71.** Error of order of reaction at  $[\text{Cu}^{2+}] = 50 \text{ g mL}^{-1}$  in 10 minutes

| <b>Optical density</b> | <b>Average OD</b> | <b>CV</b> |
|------------------------|-------------------|-----------|
| <b>30 mL</b>           |                   |           |
| 0.7288±0.0005          | 0.7286±0.0005     | 0.0291    |
| 0.7284±0.0005          |                   |           |
| 0.7287±0.0005          |                   |           |
| <b>32 mL</b>           |                   |           |
| 0.7688±0.0010          | 0.7683±0.0010     | 0.0528    |
| 0.7681±0.0010          |                   |           |
| 0.7681±0.0010          |                   |           |
| <b>34 mL</b>           |                   |           |
| 0.8100±0.0020          | 0.8109±0.0020     | 0.1028    |
| 0.8112±0.0020          |                   |           |
| 0.8116±0.0020          |                   |           |
| <b>36 mL</b>           |                   |           |
| 0.8544±0.0006          | 0.8541±0.0006     | 0.0298    |
| 0.8541±0.0006          |                   |           |
| 0.8539±0.0006          |                   |           |
| <b>38 mL</b>           |                   |           |
| 0.9149±0.0008          | 0.9145±0.0008     | 0.0354    |
| 0.9144±0.0008          |                   |           |
| 0.9143±0.0008          |                   |           |

Trendline  $y = 0.0229x + 0.0374$  with  $R^2 = 0.9928$ .



**Table S72.** Error of order of reaction at  $[\text{Cu}^{2+}] = 50 \text{ g mL}^{-1}$  in 15 minutes

| <b>Optical density</b> | <b>Average OD</b> | <b>CV</b> |
|------------------------|-------------------|-----------|
| <b>30 mL</b>           |                   |           |
| 0.6958±0.0008          | 0.6954±0.0008     | 0.0508    |
| 0.6951±0.0008          |                   |           |
| 0.6954±0.0008          |                   |           |
| <b>32 mL</b>           |                   |           |
| 0.7466±0.0017          | 0.7467±0.0017     | 0.0951    |
| 0.7461±0.0017          |                   |           |
| 0.7475±0.0017          |                   |           |
| <b>34 mL</b>           |                   |           |
| 0.7951±0.0009          | 0.7948±0.0009     | 0.0479    |
| 0.7944±0.0009          |                   |           |
| 0.7950±0.0009          |                   |           |
| <b>36 mL</b>           |                   |           |
| 0.8334±0.0012          | 0.8335±0.0012     | 0.0617    |
| 0.8331±0.0012          |                   |           |
| 0.8341±0.0012          |                   |           |
| <b>38 mL</b>           |                   |           |
| 0.8754±0.0010          | 0.8750±0.0010     | 0.0464    |
| 0.8751±0.0010          |                   |           |
| 0.8746±0.0010          |                   |           |

Trendline  $y = 0.0223x + 0.0309$  with  $R^2 = 0.9966$ .

**Table S73.** Error of order of reaction at  $[\text{Cu}^{2+}] = 50 \text{ g mL}^{-1}$  in 20 minutes

| <b>Optical density</b> | <b>Average OD</b> | <b>CV</b> |
|------------------------|-------------------|-----------|
| <b>30 mL</b>           |                   |           |
| 0.7122±0.0008          | 0.7125±0.0008     | 0.0496    |
| 0.7129±0.0008          |                   |           |
| 0.7125±0.0008          |                   |           |
| <b>32 mL</b>           |                   |           |
| 0.7699±0.0010          | 0.7695±0.0010     | 0.0527    |
| 0.7691±0.0010          |                   |           |
| 0.7696±0.0010          |                   |           |
| <b>34 mL</b>           |                   |           |
| 0.8222±0.0023          | 0.8228±0.0023     | 0.1130    |
| 0.8224±0.0023          |                   |           |
| 0.8239±0.0023          |                   |           |
| <b>36 mL</b>           |                   |           |
| 0.8677±0.0008          | 0.8673±0.0008     | 0.0373    |
| 0.8671±0.0008          |                   |           |
| 0.8672±0.0008          |                   |           |
| <b>38 mL</b>           |                   |           |
| 0.9114±0.0008          | 0.9116±0.0008     | 0.0355    |
| 0.9120±0.0008          |                   |           |
| 0.9115±0.0008          |                   |           |

Trendline:  $y = 0.0248x - 0.0265$  with  $R^2 = 0.9965$ .

**Table S74.** Error of order of reaction at  $[\text{Cu}^{2+}] = 50 \text{ g mL}^{-1}$  in 25 minutes

| <b>Optical density</b> | <b>Average OD</b> | <b>CV</b> |
|------------------------|-------------------|-----------|
| <b>30 mL</b>           |                   |           |
| 0.7031±0.0029          | 0.7039±0.0029     | 0.1695    |
| 0.7034±0.0029          |                   |           |
| 0.7053±0.0029          |                   |           |
| <b>32 mL</b>           |                   |           |
| 0.7566±0.0021          | 0.7568±0.0021     | 0.1155    |
| 0.7561±0.0021          |                   |           |
| 0.7578±0.0021          |                   |           |
| <b>34 mL</b>           |                   |           |
| 0.8052±0.0019          | 0.8051±0.0019     | 0.0997    |
| 0.8059±0.0019          |                   |           |
| 0.8043±0.0019          |                   |           |
| <b>36 mL</b>           |                   |           |
| 0.8400±0.0016          | 0.8406±0.0016     | 0.0789    |
| 0.8409±0.0016          |                   |           |
| 0.8410±0.0016          |                   |           |
| <b>38 mL</b>           |                   |           |
| 0.8922±0.0011          | 0.8927±0.0011     | 0.0531    |
| 0.8931±0.0011          |                   |           |
| 0.8929±0.0011          |                   |           |

Trendline  $y = 0.0231x + 0.0154$  with  $R^2 = 0.9963$ .

**Table S75.** Error of order of reaction at  $[\text{Cu}^{2+}] = 50 \text{ g mL}^{-1}$  in 30 minutes

| <b>Optical density</b> | <b>Average OD</b> | <b>CV</b> |
|------------------------|-------------------|-----------|
| <b>30 mL</b>           |                   |           |
| 0.7112±0.0010          | 0.7113±0.0010     | 0.0588    |
| 0.7118±0.0010          |                   |           |
| 0.7110±0.0010          |                   |           |
| <b>32 mL</b>           |                   |           |
| 0.7520±0.0017          | 0.7521±0.0017     | 0.0944    |
| 0.7529±0.0017          |                   |           |
| 0.7515±0.0017          |                   |           |
| <b>34 mL</b>           |                   |           |
| 0.8028±0.0012          | 0.8022±0.0012     | 0.0641    |
| 0.8021±0.0012          |                   |           |
| 0.8018±0.0012          |                   |           |
| <b>36 mL</b>           |                   |           |
| 0.8489±0.0018          | 0.8481±0.0018     | 0.0886    |
| 0.8481±0.0018          |                   |           |
| 0.8474±0.0018          |                   |           |
| <b>38 mL</b>           |                   |           |
| 0.8993±0.0028          | 0.8987±0.0028     | 0.1290    |
| 0.8995±0.0028          |                   |           |
| 0.8974±0.0028          |                   |           |

Trendline:  $y = 0.0235x + 0.0021$  with  $R^2 = 0.9988$ .

**Table S76.** Error of kinetic equation at  $[\text{Cu}^{2+}] = 100 \text{ g mL}^{-1}$ 

| <b>Optical density</b> | <b>Average OD</b> | <b>CV</b> |
|------------------------|-------------------|-----------|
| <b>30 mL</b>           |                   |           |
| 0.6991±0.0018          | 0.6999±0.0018     | 0.1035    |
| 0.7003±0.0018          |                   |           |
| 0.7004±0.0018          |                   |           |
| <b>32 mL</b>           |                   |           |
| 0.7508±0.0014          | 0.7501±0.0014     | 0.0783    |
| 0.7497±0.0014          |                   |           |
| 0.7499±0.0014          |                   |           |
| <b>34 mL</b>           |                   |           |
| 0.8015±0.0012          | 0.8010±0.0012     | 0.0630    |
| 0.8011±0.0012          |                   |           |
| 0.8005±0.0012          |                   |           |
| <b>36 mL</b>           |                   |           |
| 0.8482±0.0011          | 0.8479±0.0011     | 0.0546    |
| 0.8474±0.0011          |                   |           |
| 0.8482±0.0011          |                   |           |
| <b>38 mL</b>           |                   |           |
| 0.8861±0.0012          | 0.8865±0.0012     | 0.0580    |
| 0.8871±0.0012          |                   |           |
| 0.8864±0.0012          |                   |           |

Trendline:  $y = 0.0236x - 0.0036$  with  $R^2 = 0.9973$ .

**Table S77.** Error of kinetic equation at  $[\text{Cu}^{2+}] = 90 \text{ g mL}^{-1}$ 

| <b>Optical density</b> | <b>Average OD</b> | <b>CV</b> |
|------------------------|-------------------|-----------|
| <b>30 mL</b>           |                   |           |
| 0.7055±0.0022          | 0.7051±0.0022     | 0.1288    |
| 0.7058±0.0022          |                   |           |
| 0.7041±0.0022          |                   |           |
| <b>32 mL</b>           |                   |           |
| 0.7421±0.0019          | 0.7420±0.0019     | 0.1082    |
| 0.7428±0.0019          |                   |           |
| 0.7412±0.0019          |                   |           |
| <b>34 mL</b>           |                   |           |
| 0.7921±0.0012          | 0.7922±0.0012     | 0.0649    |
| 0.7928±0.0012          |                   |           |
| 0.7918±0.0012          |                   |           |
| <b>36 mL</b>           |                   |           |
| 0.8403±0.0015          | 0.8397±0.0015     | 0.0719    |
| 0.8391±0.0015          |                   |           |
| 0.8398±0.0015          |                   |           |
| <b>38 mL</b>           |                   |           |
| 0.8888±0.0012          | 0.8887±0.0012     | 0.0568    |
| 0.8892±0.0012          |                   |           |
| 0.8882±0.0012          |                   |           |

Trendline:  $y = 0.0232x + 0.0032$  with  $R^2 = 0.9976$ .

**Table S78.** Error of kinetic equation at  $[\text{Cu}^{2+}] = 80 \text{ g mL}^{-1}$ 

| <b>Optical density</b> | <b>Average OD</b> | <b>CV</b> |
|------------------------|-------------------|-----------|
| <b>30 mL</b>           |                   |           |
| 0.6579±0.0012          | 0.6573±0.0012     | 0.0753    |
| 0.6571±0.0012          |                   |           |
| 0.6570±0.0012          |                   |           |
| <b>32 mL</b>           |                   |           |
| 0.7025±0.0013          | 0.7019±0.0013     | 0.0786    |
| 0.7014±0.0013          |                   |           |
| 0.7019±0.0013          |                   |           |
| <b>34 mL</b>           |                   |           |
| 0.7499±0.0010          | 0.7495±0.0010     | 0.0541    |
| 0.7491±0.0010          |                   |           |
| 0.7496±0.0010          |                   |           |
| <b>36 mL</b>           |                   |           |
| 0.7912±0.0011          | 0.7909±0.0011     | 0.0586    |
| 0.7904±0.0011          |                   |           |
| 0.7912±0.0011          |                   |           |
| <b>38 mL</b>           |                   |           |
| 0.8320±0.0012          | 0.8315±0.0012     | 0.0607    |
| 0.8310±0.0012          |                   |           |
| 0.8316±0.0012          |                   |           |

Trendline:  $y = 0.0219 + 0.0026x$  with  $R^2 = 0.9990$ .

**Table S79.** Error of kinetic equation at  $[\text{Cu}^{2+}] = 70 \text{ g mL}^{-1}$ 

| <b>Optical density</b> | <b>Average OD</b> | <b>CV</b> |
|------------------------|-------------------|-----------|
| <b>30 mL</b>           |                   |           |
| 0.7016±0.0009          | 0.7014±0.0009     | 0.0542    |
| 0.7010±0.0009          |                   |           |
| 0.7017±0.0009          |                   |           |
| <b>32 mL</b>           |                   |           |
| 0.7569±0.0010          | 0.7565±0.0010     | 0.0560    |
| 0.7561±0.0010          |                   |           |
| 0.7567±0.0010          |                   |           |
| <b>34 mL</b>           |                   |           |
| 0.7969±0.0017          | 0.7968±0.0017     | 0.0883    |
| 0.7961±0.0017          |                   |           |
| 0.7975±0.0017          |                   |           |
| <b>36 mL</b>           |                   |           |
| 0.8391±0.0018          | 0.8389±0.0018     | 0.0911    |
| 0.8381±0.0018          |                   |           |
| 0.8396±0.0018          |                   |           |
| <b>38 mL</b>           |                   |           |
| 0.8949±0.0022          | 0.8940±0.002      | 0.1009    |
| 0.8941±0.0022          |                   |           |
| 0.8931±0.0022          |                   |           |

Trendline:  $y = 0.0234x + 0.0026$  with  $R^2 = 0.9964$ .



**Table S80.** Error of kinetic equation at  $[\text{Cu}^{2+}] = 60 \text{ g mL}^{-1}$ 

| <b>Optical density</b> | <b>Average OD</b> | <b>CV</b> |
|------------------------|-------------------|-----------|
| <b>30 mL</b>           |                   |           |
| 0.7722±0.0012          | 0.7727±0.0012     | 0.0653    |
| 0.7732±0.0012          |                   |           |
| 0.7728±0.0012          |                   |           |
| <b>32 mL</b>           |                   |           |
| 0.8091±0.0012          | 0.8086±0.0012     | 0.0624    |
| 0.8081±0.0012          |                   |           |
| 0.8087±0.0012          |                   |           |
| <b>34 mL</b>           |                   |           |
| 0.8699±0.0010          | 0.8694±0.0010     | 0.0481    |
| 0.8691±0.0010          |                   |           |
| 0.8693±0.0010          |                   |           |
| <b>36 mL</b>           |                   |           |
| 0.9109±0.0013          | 0.9106±0.0013     | 0.0606    |
| 0.9110±0.0013          |                   |           |
| 0.9100±0.0013          |                   |           |
| <b>38 mL</b>           |                   |           |
| 0.9771±0.0023          | 0.9761±0.0023     | 0.0974    |
| 0.9761±0.0023          |                   |           |
| 0.9752±0.0023          |                   |           |

Trendline  $y = 0.0254x + 0.0025$  with  $R^2 = 0.9914$ .

**Table S81.** Error of kinetic equation at  $[\text{Cu}^{2+}] = 50 \text{ g mL}^{-1}$ 

| <b>Optical density</b> | <b>Average OD</b> | <b>CV</b> |
|------------------------|-------------------|-----------|
| <b>30 mL</b>           |                   |           |
| 0.7119±0.0023          | 0.7111±0.0023     | 0.1307    |
| 0.7101±0.0023          |                   |           |
| 0.7114±0.0023          |                   |           |
| <b>32 mL</b>           |                   |           |
| 0.7744±0.0018          | 0.7742±0.0018     | 0.0987    |
| 0.7749±0.0018          |                   |           |
| 0.7734±0.0018          |                   |           |
| <b>34 mL</b>           |                   |           |
| 0.8169±0.0012          | 0.8163±0.0012     | 0.0606    |
| 0.8161±0.0012          |                   |           |
| 0.8160±0.0012          |                   |           |
| <b>36 mL</b>           |                   |           |
| 0.8699±0.0015          | 0.8692±0.0015     | 0.0704    |
| 0.8691±0.0015          |                   |           |
| 0.8697±0.0015          |                   |           |
| <b>38 mL</b>           |                   |           |
| 0.9041±0.0011          | 0.9039±0.0011     | 0.0524    |
| 0.9034±0.0011          |                   |           |
| 0.9043±0.0011          |                   |           |

Trendline  $y = 0.024x - 0.0021$  with  $R^2 = 0.9912$ .

**Table S82.** Error of kinetic equation at  $[\text{Cu}^{2+}] = 40 \text{ g mL}^{-1}$ 

| <b>Optical density</b> | <b>Average OD</b> | <b>CV</b> |
|------------------------|-------------------|-----------|
| <b>30 mL</b>           |                   |           |
| 0.7233±0.0025          | 0.7239±0.0025     | 0.1398    |
| 0.7234±0.0025          |                   |           |
| 0.7251±0.0025          |                   |           |
| <b>32 mL</b>           |                   |           |
| 0.7555±0.0016          | 0.7553±0.0016     | 0.0883    |
| 0.7559±0.0016          |                   |           |
| 0.7546±0.0016          |                   |           |
| <b>34 mL</b>           |                   |           |
| 0.8061±0.0012          | 0.8056±0.0012     | 0.0626    |
| 0.8051±0.0012          |                   |           |
| 0.8057±0.0012          |                   |           |
| <b>36 mL</b>           |                   |           |
| 0.8549±0.0010          | 0.8545±0.0010     | 0.0475    |
| 0.8541±0.0010          |                   |           |
| 0.8546±0.0010          |                   |           |
| <b>38 mL</b>           |                   |           |
| 0.9129±0.0019          | 0.9121±0.0019     | 0.0880    |
| 0.9122±0.0019          |                   |           |
| 0.9113±0.0019          |                   |           |

Trendline:  $y = 0.0238x + 0.0018$  with  $R^2 = 0.9908$ .

**Table S83.** Error of kinetic equation at  $[\text{Cu}^{2+}] = 30 \text{ g mL}^{-1}$ 

| <b>Optical density</b> | <b>Average OD</b> | <b>CV</b> |
|------------------------|-------------------|-----------|
| <b>30 mL</b>           |                   |           |
| 0.7432±0.0022          | 0.7422±0.0022     | 0.1223    |
| 0.7421±0.0022          |                   |           |
| 0.7414±0.0022          |                   |           |
| <b>32 mL</b>           |                   |           |
| 0.7841±0.0010          | 0.7845±0.0010     | 0.0517    |
| 0.7846±0.0010          |                   |           |
| 0.7849±0.0010          |                   |           |
| <b>34 mL</b>           |                   |           |
| 0.8333±0.0024          | 0.8323±0.0024     | 0.1204    |
| 0.8324±0.0024          |                   |           |
| 0.8313±0.0024          |                   |           |
| <b>36 mL</b>           |                   |           |
| 0.8781±0.0018          | 0.8789±0.0018     | 0.0870    |
| 0.8791±0.0018          |                   |           |
| 0.8796±0.0018          |                   |           |
| <b>38 mL</b>           |                   |           |
| 0.9401±0.0014          | 0.9403±0.0014     | 0.0624    |
| 0.9410±0.0014          |                   |           |
| 0.9399±0.0014          |                   |           |

Trendline:  $y = 0.0245x + 0.0016$  with  $R^2 = 0.9953$ .

**Table S84.** Error of kinetic equation at  $[\text{Cu}^{2+}] = 20 \text{ g mL}^{-1}$ 

| <b>Optical density</b> | <b>Average OD</b> | <b>CV</b> |
|------------------------|-------------------|-----------|
| <b>30 mL</b>           |                   |           |
| 0.6999±0.0011          | 0.6996±0.0011     | 0.0662    |
| 0.6991±0.0011          |                   |           |
| 0.6999±0.0011          |                   |           |
| <b>32 mL</b>           |                   |           |
| 0.7419±0.0015          | 0.7412±0.0015     | 0.0826    |
| 0.7411±0.0015          |                   |           |
| 0.7407±0.0015          |                   |           |
| <b>34 mL</b>           |                   |           |
| 0.7844±0.0008          | 0.7845±0.0008     | 0.0413    |
| 0.7849±0.0008          |                   |           |
| 0.7843±0.0008          |                   |           |
| <b>36 mL</b>           |                   |           |
| 0.8302±0.0010          | 0.8298±0.0010     | 0.0489    |
| 0.8299±0.0010          |                   |           |
| 0.8294±0.0010          |                   |           |
| <b>38 mL</b>           |                   |           |
| 0.8882±0.0014          | 0.8875±0.0014     | 0.0661    |
| 0.8871±0.0014          |                   |           |
| 0.8873±0.0014          |                   |           |

Trendline:  $y = 0.0232x - 0.001$  with  $R^2 = 0.9955$ .

**Table S85.** Error of kinetic equation at  $[\text{Cu}^{2+}] = 10 \text{ g mL}^{-1}$ 

| <b>Optical density</b> | <b>Average OD</b> | <b>CV</b> |
|------------------------|-------------------|-----------|
| <b>30 mL</b>           |                   |           |
| 0.6859±0.0015          | 0.6852±0.0015     | 0.0893    |
| 0.6851±0.0015          |                   |           |
| 0.6847±0.0015          |                   |           |
| <b>32 mL</b>           |                   |           |
| 0.7477±0.0028          | 0.7471±0.0028     | 0.1552    |
| 0.7479±0.0028          |                   |           |
| 0.7458±0.0028          |                   |           |
| <b>34 mL</b>           |                   |           |
| 0.7892±0.0013          | 0.7886±0.0013     | 0.0700    |
| 0.7881±0.0013          |                   |           |
| 0.7886±0.0013          |                   |           |
| <b>36 mL</b>           |                   |           |
| 0.8399±0.0014          | 0.8397±0.0014     | 0.0678    |
| 0.8402±0.0014          |                   |           |
| 0.8391±0.0014          |                   |           |
| <b>38 mL</b>           |                   |           |
| 0.8709±0.0012          | 0.8703±0.0012     | 0.0591    |
| 0.8699±0.0012          |                   |           |
| 0.8702±0.0012          |                   |           |

Trendline:  $y = 0.0231x - 0.0006$  with  $R^2 = 0.9884$ .

**Table S86.** Error of thermodynamic equation at solution's temperature T = 29°C

| <b>Optical density</b> | <b>Average OD</b> | <b>CV</b> |
|------------------------|-------------------|-----------|
| <b>30 mL</b>           |                   |           |
| 0.7244±0.0033          | 0.7246±0.0033     | 0.1884    |
| 0.7234±0.0033          |                   |           |
| 0.7261±0.0033          |                   |           |
| <b>32 mL</b>           |                   |           |
| 0.7681±0.0009          | 0.7678±0.0009     | 0.0495    |
| 0.7674±0.0009          |                   |           |
| 0.7680±0.0009          |                   |           |
| <b>34 mL</b>           |                   |           |
| 0.8199±0.0016          | 0.8191±0.0016     | 0.0814    |
| 0.8187±0.0016          |                   |           |
| 0.8188±0.0016          |                   |           |
| <b>36 mL</b>           |                   |           |
| 0.8759±0.0020          | 0.8752±0.0020     | 0.0952    |
| 0.8755±0.0020          |                   |           |
| 0.8743±0.0020          |                   |           |
| <b>38 mL</b>           |                   |           |
| 0.9133±0.0021          | 0.9131±0.0021     | 0.0945    |
| 0.9139±0.0021          |                   |           |
| 0.9122±0.0021          |                   |           |

Trendline:  $y = 0.0242x - 0.0035$  with  $R^2 = 0.9967$ .

**Table S87.** Error of thermodynamic equation at solution's temperature T = 31°C

| <b>Optical density</b> | <b>Average OD</b> | <b>CV</b> |
|------------------------|-------------------|-----------|
| <b>30 mL</b>           |                   |           |
| 0.7239±0.0010          | 0.7235±0.0010     | 0.0561    |
| 0.7231±0.0010          |                   |           |
| 0.7236±0.0010          |                   |           |
| <b>32 mL</b>           |                   |           |
| 0.7702±0.0026          | 0.7694±0.0026     | 0.1402    |
| 0.7699±0.0026          |                   |           |
| 0.7682±0.0026          |                   |           |
| <b>34 mL</b>           |                   |           |
| 0.8199±0.0010          | 0.8194±0.0010     | 0.0510    |
| 0.8191±0.0010          |                   |           |
| 0.8193±0.0010          |                   |           |
| <b>36 mL</b>           |                   |           |
| 0.8749±0.0007          | 0.8747±0.0007     | 0.0333    |
| 0.8744±0.0007          |                   |           |
| 0.8749±0.0007          |                   |           |
| <b>38 mL</b>           |                   |           |
| 0.9109±0.0014          | 0.9102±0.0014     | 0.0645    |
| 0.9100±0.0014          |                   |           |
| 0.9098±0.0014          |                   |           |

Trendline  $y = 0.0239x + 0.0057$  with  $R^2 = 0.9963$ .



**Table S88.** Error of thermodynamic equation at solution's temperature T = 33°C

| <b>Optical density</b> | <b>Average OD</b> | <b>CV</b> |
|------------------------|-------------------|-----------|
| <b>30 mL</b>           |                   |           |
| 0.7339±0.0012          | 0.7333±0.0012     | 0.0675    |
| 0.7331±0.0012          |                   |           |
| 0.7330±0.0012          |                   |           |
| <b>32 mL</b>           |                   |           |
| 0.7766±0.0030          | 0.7768±0.0030     | 0.1600    |
| 0.7761±0.0030          |                   |           |
| 0.7784±0.0030          |                   |           |
| <b>34 mL</b>           |                   |           |
| 0.8309±0.0011          | 0.8306±0.0011     | 0.0558    |
| 0.8301±0.0011          |                   |           |
| 0.8309±0.0011          |                   |           |
| <b>36 mL</b>           |                   |           |
| 0.8788±0.0008          | 0.8784±0.0008     | 0.0402    |
| 0.8781±0.0008          |                   |           |
| 0.8784±0.0008          |                   |           |
| <b>38 mL</b>           |                   |           |
| 0.9288±0.0008          | 0.9284±0.0008     | 0.0380    |
| 0.9281±0.0008          |                   |           |
| 0.9284±0.0008          |                   |           |

Trendline:  $y = 0.0246x - 0.0066$  with  $R^2 = 0.9992$ .

**Table S89.** Error of thermodynamic equation at solution's temperature T = 35°C

| <b>Optical density</b> | <b>Average OD</b> | <b>CV</b> |
|------------------------|-------------------|-----------|
| <b>30 mL</b>           |                   |           |
| 0.7229±0.0010          | 0.7224±0.0010     | 0.0579    |
| 0.7221±0.0010          |                   |           |
| 0.7223±0.0010          |                   |           |
| <b>32 mL</b>           |                   |           |
| 0.7805±0.0020          | 0.7799±0.0020     | 0.1045    |
| 0.7790±0.0020          |                   |           |
| 0.7803±0.0020          |                   |           |
| <b>34 mL</b>           |                   |           |
| 0.8333±0.0019          | 0.8336±0.0019     | 0.0952    |
| 0.8331±0.0019          |                   |           |
| 0.8345±0.0019          |                   |           |
| <b>36 mL</b>           |                   |           |
| 0.8849±0.0015          | 0.8843±0.0015     | 0.0683    |
| 0.8844±0.0015          |                   |           |
| 0.8849±0.0015          |                   |           |
| <b>38 mL</b>           |                   |           |
| 0.9151±0.0011          | 0.9155±0.0011     | 0.0494    |
| 0.9155±0.0011          |                   |           |
| 0.9160±0.0011          |                   |           |

Trendline:  $y = 0.0245x - 0.0069$  with  $R^2 = 0.9897$ .

**Table S90.** Error of thermodynamic equation at solution's temperature T = 37°C

| <b>Optical density</b> | <b>Average OD</b> | <b>CV</b> |
|------------------------|-------------------|-----------|
| <b>30 mL</b>           |                   |           |
| 0.7211±0.0018          | 0.7214±0.0018     | 0.1051    |
| 0.7209±0.0018          |                   |           |
| 0.7223±0.0018          |                   |           |
| <b>32 mL</b>           |                   |           |
| 0.7701±0.0017          | 0.7708±0.0017     | 0.0912    |
| 0.7709±0.0017          |                   |           |
| 0.7715±0.0017          |                   |           |
| <b>34 mL</b>           |                   |           |
| 0.8249±0.0010          | 0.8245±0.0010     | 0.0492    |
| 0.8241±0.0010          |                   |           |
| 0.8246±0.0010          |                   |           |
| <b>36 mL</b>           |                   |           |
| 0.8655±0.0008          | 0.8651±0.0008     | 0.0408    |
| 0.8651±0.0008          |                   |           |
| 0.8648±0.0008          |                   |           |
| <b>38 mL</b>           |                   |           |
| 0.9139±0.0019          | 0.9130±0.0019     | 0.0851    |
| 0.9128±0.0019          |                   |           |
| 0.9124±0.0019          |                   |           |

Trendline:  $y = 0.0239x + 0.0072$  with  $R^2 = 0.9983$ .

**Table S91.** Error of adsorption first time

| <b>Optical density</b> | <b>Average OD</b> | <b>CV</b> |
|------------------------|-------------------|-----------|
| <b>30 mL</b>           |                   |           |
| 0.6991±0.0012          | 0.6985±0.0012     | 0.0736    |
| 0.6981±0.0012          |                   |           |
| 0.6984±0.0012          |                   |           |
| <b>32 mL</b>           |                   |           |
| 0.7441±0.0012          | 0.7435±0.0012     | 0.0692    |
| 0.7431±0.0012          |                   |           |
| 0.7434±0.0012          |                   |           |
| <b>34 mL</b>           |                   |           |
| 0.7988±0.0008          | 0.7984±0.0008     | 0.0442    |
| 0.7981±0.0008          |                   |           |
| 0.7984±0.0008          |                   |           |
| <b>36 mL</b>           |                   |           |
| 0.8520±0.0020          | 0.8511±0.0020     | 0.0950    |
| 0.8510±0.0020          |                   |           |
| 0.8504±0.0020          |                   |           |
| <b>38 mL</b>           |                   |           |
| 0.8799±0.0023          | 0.8791±0.0023     | 0.1057    |
| 0.8794±0.0023          |                   |           |
| 0.8781±0.0023          |                   |           |

Trendline  $y = 0.0234x - 0.0028$  with  $R^2 = 0.9903$ .

**Table S92.** Error of desorption first time

| <b>Optical density</b> | <b>Average OD</b> | <b>CV</b> |
|------------------------|-------------------|-----------|
| <b>30 mL</b>           |                   |           |
| 0.7150±0.0014          | 0.7143±0.0014     | 0.0822    |
| 0.7141±0.0014          |                   |           |
| 0.7139±0.0014          |                   |           |
| <b>32 mL</b>           |                   |           |
| 0.7533±0.0011          | 0.7538±0.0011     | 0.0629    |
| 0.7542±0.0011          |                   |           |
| 0.7540±0.0011          |                   |           |
| <b>34 mL</b>           |                   |           |
| 0.8095±0.0018          | 0.8089±0.0018     | 0.0912    |
| 0.8081±0.0018          |                   |           |
| 0.8092±0.0018          |                   |           |
| <b>36 mL</b>           |                   |           |
| 0.8634±0.0007          | 0.8637±0.0007     | 0.0337    |
| 0.8639±0.0007          |                   |           |
| 0.8639±0.0007          |                   |           |
| <b>38 mL</b>           |                   |           |
| 0.8977±0.0020          | 0.8978±0.0020     | 0.0901    |
| 0.8971±0.0020          |                   |           |
| 0.8987±0.0020          |                   |           |

Trendline:  $y = 0.0238x - 0.003$  with  $R^2 = 0.9938$ .

**Table S93.** Error of adsorption second time

| <b>Optical density</b> | <b>Average OD</b> | <b>CV</b> |
|------------------------|-------------------|-----------|
| <b>30 mL</b>           |                   |           |
| 0.7042±0.0027          | 0.7032±0.0027     | 0.1583    |
| 0.7030±0.0027          |                   |           |
| 0.7025±0.0027          |                   |           |
| <b>32 mL</b>           |                   |           |
| 0.7559±0.0010          | 0.7554±0.0010     | 0.0553    |
| 0.7551±0.0010          |                   |           |
| 0.7553±0.0010          |                   |           |
| <b>34 mL</b>           |                   |           |
| 0.7941±0.0018          | 0.7949±0.0018     | 0.0962    |
| 0.7951±0.0018          |                   |           |
| 0.7956±0.0018          |                   |           |
| <b>36 mL</b>           |                   |           |
| 0.8351±0.0021          | 0.8349±0.0021     | 0.1033    |
| 0.8340±0.0021          |                   |           |
| 0.8357±0.0021          |                   |           |
| <b>38 mL</b>           |                   |           |
| 0.8961±0.0024          | 0.8969±0.0024     | 0.1083    |
| 0.8967±0.0024          |                   |           |
| 0.8980±0.0024          |                   |           |

Trendline:  $y = 0.0233x + 0.0033$  with  $R^2 = 0.9932$ .

**Table S94.** Error of desorption second time

| <b>Optical density</b> | <b>Average OD</b> | <b>CV</b> |
|------------------------|-------------------|-----------|
| <b>30 mL</b>           |                   |           |
| 0.7175±0.0018          | 0.7169±0.0018     | 0.1029    |
| 0.7161±0.0018          |                   |           |
| 0.7172±0.0018          |                   |           |
| <b>32 mL</b>           |                   |           |
| 0.7635±0.0012          | 0.7629±0.0012     | 0.0648    |
| 0.7626±0.0012          |                   |           |
| 0.7627±0.0012          |                   |           |
| <b>34 mL</b>           |                   |           |
| 0.8168±0.0021          | 0.8158±0.0021     | 0.1072    |
| 0.8151±0.0021          |                   |           |
| 0.8156±0.0021          |                   |           |
| <b>36 mL</b>           |                   |           |
| 0.8722±0.0024          | 0.8712±0.0024     | 0.1150    |
| 0.8713±0.0024          |                   |           |
| 0.8702±0.0024          |                   |           |
| <b>38 mL</b>           |                   |           |
| 0.9021±0.0026          | 0.9033±0.0026     | 0.0078    |
| 0.9039±0.0026          |                   |           |
| 0.9040±0.0026          |                   |           |

Trendline:  $y = 0.0241x - 0.0038$  with  $R^2 = 0.9938$ .

**Table S95.** Error of adsorption third time

| <b>Optical density</b> | <b>Average OD</b> | <b>CV</b> |
|------------------------|-------------------|-----------|
| <b>30 mL</b>           |                   |           |
| 0.7099±0.0022          | 0.7094±0.0022     | 0.1264    |
| 0.7100±0.0022          |                   |           |
| 0.7084±0.0022          |                   |           |
| <b>32 mL</b>           |                   |           |
| 0.7551±0.0038          | 0.7538±0.0038     | 0.2061    |
| 0.7521±0.0038          |                   |           |
| 0.7543±0.0038          |                   |           |
| <b>34 mL</b>           |                   |           |
| 0.8081±0.0038          | 0.8088±0.0038     | 0.1901    |
| 0.8078±0.0038          |                   |           |
| 0.8106±0.0038          |                   |           |
| <b>36 mL</b>           |                   |           |
| 0.8544±0.0016          | 0.8536±0.0016     | 0.0798    |
| 0.8531±0.0016          |                   |           |
| 0.8534±0.0016          |                   |           |
| <b>38 mL</b>           |                   |           |
| 0.8944±0.0065          | 0.8974±0.0065     | 0.2953    |
| 0.8986±0.0065          |                   |           |
| 0.8993±0.0065          |                   |           |

Trendline  $y = 0.0238x - 0.0043$  with  $R^2 = 0.9984$ .



**Table S96.** Error of desorption third time

| <b>Optical density</b> | <b>Average OD</b> | <b>CV</b> |
|------------------------|-------------------|-----------|
| <b>30 mL</b>           |                   |           |
| 0.7088±0.0008          | 0.7084±0.0008     | 0.0499    |
| 0.7081±0.0008          |                   |           |
| 0.7084±0.0008          |                   |           |
| <b>32 mL</b>           |                   |           |
| 0.7523±0.0013          | 0.7528±0.0013     | 0.0733    |
| 0.7534±0.0013          |                   |           |
| 0.7528±0.0013          |                   |           |
| <b>34 mL</b>           |                   |           |
| 0.8108±0.0021          | 0.8098±0.0021     | 0.1080    |
| 0.8091±0.0021          |                   |           |
| 0.8096±0.0021          |                   |           |
| <b>36 mL</b>           |                   |           |
| 0.8555±0.0032          | 0.8551±0.0032     | 0.1509    |
| 0.8562±0.0032          |                   |           |
| 0.8537±0.0032          |                   |           |
| <b>38 mL</b>           |                   |           |
| 0.8932±0.0020          | 0.8923±0.0020     | 0.0907    |
| 0.8922±0.0020          |                   |           |
| 0.8916±0.0020          |                   |           |

Trendline:  $y = 0.0235x + 0.0045$  with  $R^2 = 0.9954$ .

**Table S97.** Error of adsorption fourth time

| <b>Optical density</b> | <b>Average OD</b> | <b>CV</b> |
|------------------------|-------------------|-----------|
| <b>30 mL</b>           |                   |           |
| 0.7074±0.0039          | 0.7089±0.0039     | 0.2263    |
| 0.7088±0.0039          |                   |           |
| 0.7106±0.0093          |                   |           |
| <b>32 mL</b>           |                   |           |
| 0.7499±0.0021          | 0.7490±0.0021     | 0.1136    |
| 0.7482±0.0021          |                   |           |
| 0.7490±0.0021          |                   |           |
| <b>34 mL</b>           |                   |           |
| 0.7974±0.0016          | 0.7966±0.0016     | 0.0856    |
| 0.7961±0.0016          |                   |           |
| 0.7964±0.0016          |                   |           |
| <b>36 mL</b>           |                   |           |
| 0.8499±0.0022          | 0.8490±0.0022     | 0.1063    |
| 0.8491±0.0022          |                   |           |
| 0.8481±0.0022          |                   |           |
| <b>38 mL</b>           |                   |           |
| 0.8965±0.0020          | 0.8955±0.0020     | 0.0937    |
| 0.8951±0.0020          |                   |           |
| 0.8950±0.0020          |                   |           |

Trendline:  $y = 0.0237x - 0.0046$  with  $R^2 = 0.9982$ .

**Table S98.** Error of desorption fourth time

| <b>Optical density</b> | <b>Average OD</b> | <b>CV</b> |
|------------------------|-------------------|-----------|
| <b>30 mL</b>           |                   |           |
| 0.7088±0.0020          | 0.7078±0.0020     | 0.1186    |
| 0.7074±0.0020          |                   |           |
| 0.7073±0.0020          |                   |           |
| <b>32 mL</b>           |                   |           |
| 0.7499±0.0032          | 0.7495±0.0032     | 0.1721    |
| 0.7481±0.0032          |                   |           |
| 0.7506±0.0032          |                   |           |
| <b>34 mL</b>           |                   |           |
| 0.7959±0.0014          | 0.7957±0.0014     | 0.0716    |
| 0.7951±0.0014          |                   |           |
| 0.7962±0.0014          |                   |           |
| <b>36 mL</b>           |                   |           |
| 0.8499±0.0023          | 0.8488±0.0023     | 0.1114    |
| 0.8481±0.0023          |                   |           |
| 0.8485±0.0023          |                   |           |
| <b>38 mL</b>           |                   |           |
| 0.8944±0.0008          | 0.8947±0.0008     | 0.0395    |
| 0.8951±0.0008          |                   |           |
| 0.8947±0.0008          |                   |           |

Trendline:  $y = 0.0237x - 0.005$  with  $R^2 = 0.9985$ .

**Table S99.** Error of adsorption fifth time

| <b>Optical density</b> | <b>Average OD</b> | <b>CV</b> |
|------------------------|-------------------|-----------|
| <b>30 mL</b>           |                   |           |
| 0.7039±0.0018          | 0.7031±0.0018     | 0.1069    |
| 0.7031±0.0018          |                   |           |
| 0.7024±0.0018          |                   |           |
| <b>32 mL</b>           |                   |           |
| 0.7549±0.0029          | 0.7545±0.0029     | 0.1582    |
| 0.7555±0.0029          |                   |           |
| 0.7532±0.0029          |                   |           |
| <b>34 mL</b>           |                   |           |
| 0.8059±0.0014          | 0.8057±0.0014     | 0.0707    |
| 0.8051±0.0014          |                   |           |
| 0.8062±0.0014          |                   |           |
| <b>36 mL</b>           |                   |           |
| 0.8477±0.0002          | 0.8472±0.0002     | 0.0083    |
| 0.8471±0.0002          |                   |           |
| 0.8469±0.0002          |                   |           |
| <b>38 mL</b>           |                   |           |
| 0.8943±0.0015          | 0.8938±0.0015     | 0.0720    |
| 0.8941±0.0015          |                   |           |
| 0.8931±0.0015          |                   |           |

Trendline  $y = 0.0237x - 0.0051$  with  $R^2 = 0.9983$ .

**Table S100.** Error of desorption fifth time

| <b>Optical density</b> | <b>Average OD</b> | <b>CV</b> |
|------------------------|-------------------|-----------|
| <b>30 mL</b>           |                   |           |
| 0.7045±0.0008          | 0.7041±0.0008     | 0.0460    |
| 0.7040±0.0008          |                   |           |
| 0.7039±0.0008          |                   |           |
| <b>32 mL</b>           |                   |           |
| 0.7545±0.0023          | 0.7534±0.0023     | 0.1255    |
| 0.7531±0.0023          |                   |           |
| 0.7527±0.0023          |                   |           |
| <b>34 mL</b>           |                   |           |
| 0.8055±0.0029          | 0.8051±0.0029     | 0.1482    |
| 0.8061±0.0029          |                   |           |
| 0.8038±0.0029          |                   |           |
| <b>36 mL</b>           |                   |           |
| 0.8430±0.0124          | 0.8479±0.0124     | 0.5898    |
| 0.8478±0.0124          |                   |           |
| 0.8530±0.0124          |                   |           |
| <b>38 mL</b>           |                   |           |
| 0.8945±0.0029          | 0.8941±0.0029     | 0.1335    |
| 0.8951±0.0029          |                   |           |
| 0.8928±0.0029          |                   |           |

Trendline:  $y = 0.0237x - 0.0057$  with  $R^2 = 0.9989$ .

**Table S101.** Error of adsorption sixth time

| <b>Optical density</b> | <b>Average OD</b> | <b>CV</b> |
|------------------------|-------------------|-----------|
| <b>30 mL</b>           |                   |           |
| 0.7058±0.0051          | 0.7077±0.0051     | 0.2911    |
| 0.7099±0.0051          |                   |           |
| 0.7075±0.0051          |                   |           |
| <b>32 mL</b>           |                   |           |
| 0.7588±0.0009          | 0.7585±0.0009     | 0.0502    |
| 0.7581±0.0009          |                   |           |
| 0.7587±0.0009          |                   |           |
| <b>34 mL</b>           |                   |           |
| 0.8125±0.0018          | 0.8119±0.0018     | 0.0909    |
| 0.8111±0.0018          |                   |           |
| 0.8122±0.0018          |                   |           |
| <b>36 mL</b>           |                   |           |
| 0.8533±0.0007          | 0.8536±0.0007     | 0.0341    |
| 0.8538±0.0007          |                   |           |
| 0.8538±0.0007          |                   |           |
| <b>38 mL</b>           |                   |           |
| 0.8955±0.0014          | 0.8953±0.0014     | 0.0636    |
| 0.8958±0.0014          |                   |           |
| 0.8947±0.0014          |                   |           |

Trendline:  $y = 0.0235x + 0.0059$  with  $R^2 = 0.9967$ .

**Table S102.** Error of desorption sixth time

| <b>Optical density</b> | <b>Average OD</b> | <b>CV</b> |
|------------------------|-------------------|-----------|
| <b>30 mL</b>           |                   |           |
| 0.7099±0.0025          | 0.7087±0.0025     | 0.1428    |
| 0.7081±0.0025          |                   |           |
| 0.7082±0.0025          |                   |           |
| <b>32 mL</b>           |                   |           |
| 0.7600±0.0035          | 0.7594±0.0035     | 0.1892    |
| 0.7578±0.0035          |                   |           |
| 0.7605±0.0035          |                   |           |
| <b>34 mL</b>           |                   |           |
| 0.8012±0.0029          | 0.8023±0.0029     | 0.1503    |
| 0.8022±0.0029          |                   |           |
| 0.8036±0.0029          |                   |           |
| <b>36 mL</b>           |                   |           |
| 0.8499±0.0005          | 0.8498±0.0005     | 0.0249    |
| 0.8500±0.0005          |                   |           |
| 0.8496±0.0005          |                   |           |
| <b>38 mL</b>           |                   |           |
| 0.9034±0.0028          | 0.9021±0.0028     | 0.1261    |
| 0.9012±0.0028          |                   |           |
| 0.9018±0.0028          |                   |           |

Trendline  $y = 0.0239x - 0.0068$  with  $R^2 = 0.9990$ .

**Table S103.** Error of adsorption seventh time

| <b>Optical density</b> | <b>Average OD</b> | <b>CV</b> |
|------------------------|-------------------|-----------|
| <b>30 mL</b>           |                   |           |
| 0.7178±0.0028          | 0.7166±0.0028     | 0.1606    |
| 0.7155±0.0028          |                   |           |
| 0.7166±0.0028          |                   |           |
| <b>32 mL</b>           |                   |           |
| 0.7649±0.0022          | 0.7642±0.0022     | 0.1188    |
| 0.7632±0.0022          |                   |           |
| 0.7646±0.0022          |                   |           |
| <b>34 mL</b>           |                   |           |
| 0.8145±0.0030          | 0.8135±0.0030     | 0.1580    |
| 0.8141±0.0030          |                   |           |
| 0.8122±0.0030          |                   |           |
| <b>36 mL</b>           |                   |           |
| 0.8600±0.0016          | 0.8604±0.0016     | 0.0775    |
| 0.8612±0.0016          |                   |           |
| 0.8601±0.0016          |                   |           |
| <b>38 mL</b>           |                   |           |
| 0.9099±0.0018          | 0.9096±0.0018     | 0.0811    |
| 0.9088±0.0018          |                   |           |
| 0.9102±0.0018          |                   |           |

Trendline:  $y = 0.0241x - 0.0069$  with  $R^2 = 0.9999$ .



**Table S104.** Error of desorption seventh time

| <b>Optical density</b> | <b>Average OD</b> | <b>CV</b> |
|------------------------|-------------------|-----------|
| <b>30 mL</b>           |                   |           |
| 0.7166±0.0018          | 0.7158±0.0018     | 0.1050    |
| 0.7151±0.0018          |                   |           |
| 0.7158±0.0018          |                   |           |
| <b>32 mL</b>           |                   |           |
| 0.7576±0.0018          | 0.7569±0.0018     | 0.1010    |
| 0.7561±0.0018          |                   |           |
| 0.7571±0.0018          |                   |           |
| <b>34 mL</b>           |                   |           |
| 0.8045±0.0020          | 0.8035±0.0020     | 0.1044    |
| 0.8031±0.0020          |                   |           |
| 0.8030±0.0020          |                   |           |
| <b>36 mL</b>           |                   |           |
| 0.8606±0.0005          | 0.8604±0.0005     | 0.0246    |
| 0.8602±0.0005          |                   |           |
| 0.8605±0.0005          |                   |           |
| <b>38 mL</b>           |                   |           |
| 0.9062±0.0049          | 0.9039±0.0049     | 0.2197    |
| 0.9031±0.0049          |                   |           |
| 0.9025±0.0049          |                   |           |

Trendline  $y = 0.024x - 0.0074$  with  $R^2 = 0.9972$ .

**Table S105.** Error of adsorption eighth time

| <b>Optical density</b> | <b>Average OD</b> | <b>CV</b> |
|------------------------|-------------------|-----------|
| <b>30 mL</b>           |                   |           |
| 0.7100±0.0011          | 0.7104±0.0011     | 0.0637    |
| 0.7109±0.0011          |                   |           |
| 0.7104±0.0011          |                   |           |
| <b>32 mL</b>           |                   |           |
| 0.7566±0.0026          | 0.7555±0.0026     | 0.1391    |
| 0.7545±0.0026          |                   |           |
| 0.7555±0.0026          |                   |           |
| <b>34 mL</b>           |                   |           |
| 0.7966±0.0038          | 0.7961±0.0038     | 0.1952    |
| 0.7974±0.0038          |                   |           |
| 0.7944±0.0038          |                   |           |
| <b>36 mL</b>           |                   |           |
| 0.8536±0.0032          | 0.8522±0.0032     | 0.1532    |
| 0.8521±0.0032          |                   |           |
| 0.8510±0.0032          |                   |           |
| <b>38 mL</b>           |                   |           |
| 0.9000±0.0011          | 0.9004±0.0011     | 0.0502    |
| 0.9009±0.0011          |                   |           |
| 0.9004±0.0011          |                   |           |

Trendline:  $y = 0.0238x - 0.0075$  with  $R^2 = 0.9973$ .

**Table S106.** Error of desorption eighth time

| <b>Optical density</b> | <b>Average OD</b> | <b>CV</b> |
|------------------------|-------------------|-----------|
| <b>30 mL</b>           |                   |           |
| 0.7122±0.0021          | 0.7112±0.0021     | 0.1229    |
| 0.7110±0.0021          |                   |           |
| 0.7105±0.0021          |                   |           |
| <b>32 mL</b>           |                   |           |
| 0.7509±0.0020          | 0.7499±0.0020     | 0.1119    |
| 0.7494±0.0020          |                   |           |
| 0.7495±0.0020          |                   |           |
| <b>34 mL</b>           |                   |           |
| 0.7991±0.0057          | 0.7982±0.0057     | 0.2912    |
| 0.8000±0.0057          |                   |           |
| 0.7956±0.0057          |                   |           |
| <b>36 mL</b>           |                   |           |
| 0.8499±0.0026          | 0.8493±0.0026     | 0.1259    |
| 0.8500±0.0026          |                   |           |
| 0.8481±0.0026          |                   |           |
| <b>38 mL</b>           |                   |           |
| 0.9000±0.0018          | 0.8996±0.0018     | 0.0805    |
| 0.8988±0.0018          |                   |           |
| 0.9001±0.0018          |                   |           |

Trendline:  $y = 0.0238x - 0.0079$  with  $R^2 = 0.9974$ .

**Table S107.** Error of adsorption ninth time

| <b>Optical density</b> | <b>Average OD</b> | <b>CV</b> |
|------------------------|-------------------|-----------|
| <b>30 mL</b>           |                   |           |
| 0.7077±0.0017          | 0.7070±0.0017     | 0.0995    |
| 0.7071±0.0017          |                   |           |
| 0.7063±0.0017          |                   |           |
| <b>32 mL</b>           |                   |           |
| 0.7499±0.0018          | 0.7495±0.0018     | 0.0966    |
| 0.7500±0.0018          |                   |           |
| 0.7487±0.0018          |                   |           |
| <b>34 mL</b>           |                   |           |
| 0.8002±0.0015          | 0.7998±0.0015     | 0.0795    |
| 0.7991±0.0015          |                   |           |
| 0.8002±0.0015          |                   |           |
| <b>36 mL</b>           |                   |           |
| 0.8466±0.0042          | 0.8467±0.0042     | 0.2013    |
| 0.8451±0.0042          |                   |           |
| 0.8485±0.0042          |                   |           |
| <b>38 mL</b>           |                   |           |
| 0.8922±0.0025          | 0.8910±0.0025     | 0.1169    |
| 0.8902±0.0025          |                   |           |
| 0.8907±0.0025          |                   |           |

Trendline:  $y = 0.0233x + 0.0080$  with  $R^2 = 0.9994$ .

**Table S108.** Error of desorption ninth time

| <b>Optical density</b> | <b>Average OD</b> | <b>CV</b> |
|------------------------|-------------------|-----------|
| <b>30 mL</b>           |                   |           |
| 0.7092±0.0015          | 0.7088±0.0015     | 0.0897    |
| 0.7081±0.0015          |                   |           |
| 0.7092±0.0015          |                   |           |
| <b>32 mL</b>           |                   |           |
| 0.7361±0.0065          | 0.7365±0.0065     | 0.3565    |
| 0.7354±0.0065          |                   |           |
| 0.7381±0.0065          |                   |           |
| <b>34 mL</b>           |                   |           |
| 0.7912±0.0016          | 0.7908±0.0016     | 0.0812    |
| 0.7901±0.0016          |                   |           |
| 0.7912±0.0016          |                   |           |
| <b>36 mL</b>           |                   |           |
| 0.8392±0.0018          | 0.8383±0.0018     | 0.0904    |
| 0.8378±0.0018          |                   |           |
| 0.8380±0.0018          |                   |           |
| <b>38 mL</b>           |                   |           |
| 0.8888±0.0029          | 0.8883±0.0029     | 0.1320    |
| 0.8892±0.0029          |                   |           |
| 0.8870±0.0029          |                   |           |

Trendline:  $y = 0.0230x + 0.0092$  with  $R^2 = 0.9913$ .

**Table S109.** Error of adsorption tenth time

| <b>Optical density</b> | <b>Average OD</b> | <b>CV</b> |
|------------------------|-------------------|-----------|
| <b>30 mL</b>           |                   |           |
| 0.7168±0.0018          | 0.7159±0.0018     | 0.1059    |
| 0.7156±0.0018          |                   |           |
| 0.7154±0.0018          |                   |           |
| <b>32 mL</b>           |                   |           |
| 0.7590±0.0019          | 0.7589±0.0019     | 0.1058    |
| 0.7581±0.0019          |                   |           |
| 0.7597±0.0019          |                   |           |
| <b>34 mL</b>           |                   |           |
| 0.8044±0.0022          | 0.8043±0.0022     | 0.1122    |
| 0.8052±0.0022          |                   |           |
| 0.8034±0.0022          |                   |           |
| <b>36 mL</b>           |                   |           |
| 0.8562±0.0027          | 0.8552±0.0027     | 0.1315    |
| 0.8555±0.0027          |                   |           |
| 0.8540±0.0027          |                   |           |
| <b>38 mL</b>           |                   |           |
| 0.9098±0.0035          | 0.9085±0.0035     | 0.1562    |
| 0.9088±0.0035          |                   |           |
| 0.9070±0.0035          |                   |           |

Trendline  $y = 0.0241x - 0.010$  with  $R^2 = 0.9979$ .

**Table S110.** Error of desorption tenth time

| <b>Optical density</b> | <b>Average OD</b> | <b>CV</b> |
|------------------------|-------------------|-----------|
| <b>30 mL</b>           |                   |           |
| 0.7165±0.0012          | 0.7159±0.0012     | 0.0719    |
| 0.7155±0.0012          |                   |           |
| 0.7158±0.0012          |                   |           |
| <b>32 mL</b>           |                   |           |
| 0.7500±0.0007          | 0.7497±0.0007     | 0.0411    |
| 0.7494±0.0007          |                   |           |
| 0.7498±0.0007          |                   |           |
| <b>34 mL</b>           |                   |           |
| 0.8098±0.0021          | 0.8088±0.0021     | 0.1081    |
| 0.8081±0.0021          |                   |           |
| 0.8086±0.0021          |                   |           |
| <b>36 mL</b>           |                   |           |
| 0.8588±0.0031          | 0.8582±0.0031     | 0.1457    |
| 0.8591±0.0031          |                   |           |
| 0.8568±0.0031          |                   |           |
| <b>38 mL</b>           |                   |           |
| 0.9032±0.0023          | 0.9022±0.0023     | 0.1054    |
| 0.9022±0.0023          |                   |           |
| 0.9013±0.0023          |                   |           |

Trendline:  $y = 0.0241x - 0.0109$  with  $R^2 = 0.9947$ .

**Table S111.** ANOVA two variables

|                             | <b>F</b>             | <b>F<sub>crit</sub></b> |
|-----------------------------|----------------------|-------------------------|
| <b>pH and time</b>          |                      |                         |
| pH (A)                      | 102773.9             | 3.40                    |
| Time (B)                    | 124767.2             | 3.01                    |
| Interaction (AB)            | 13482.06             | 2.51                    |
| <b>pH and temperature</b>   |                      |                         |
| pH (A)                      | 2.68x10 <sup>8</sup> | 3.40                    |
| Temperature (B)             | 2.27x10 <sup>8</sup> | 3.01                    |
| Interaction (AB)            | 16593125             | 2.51                    |
| <b>Temperature and time</b> |                      |                         |
| Temperature (A)             | 8616299              | 2.92                    |
| Time (B)                    | 16561113             | 2.92                    |
| Interaction (AB)            | 1499828              | 2.21                    |



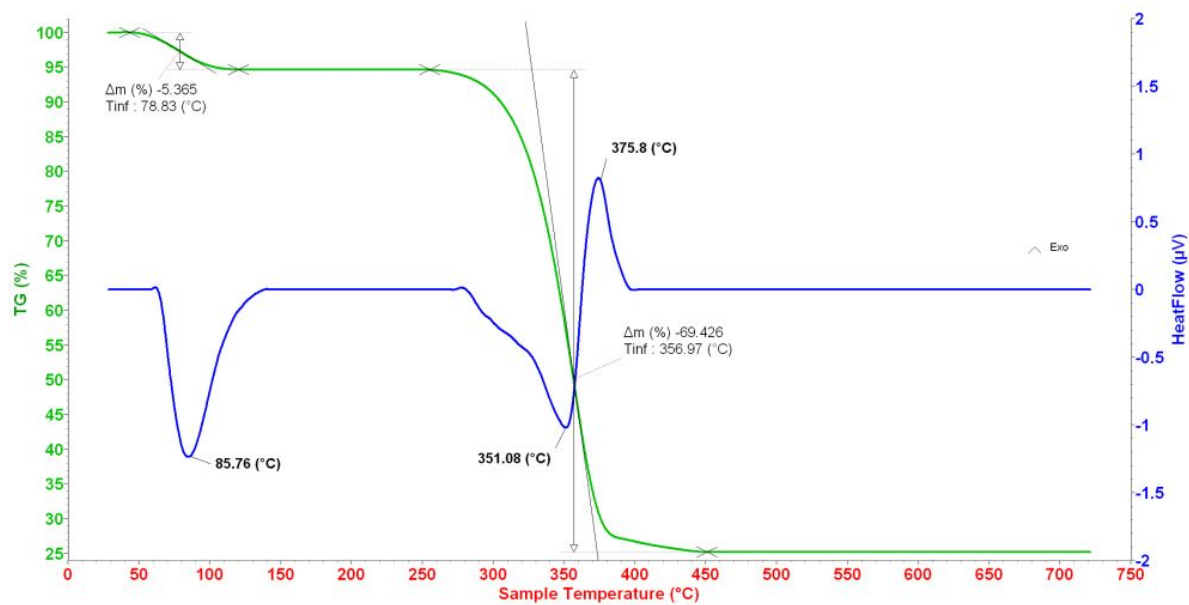

Figure S1. TGA/DSC curves of TCR

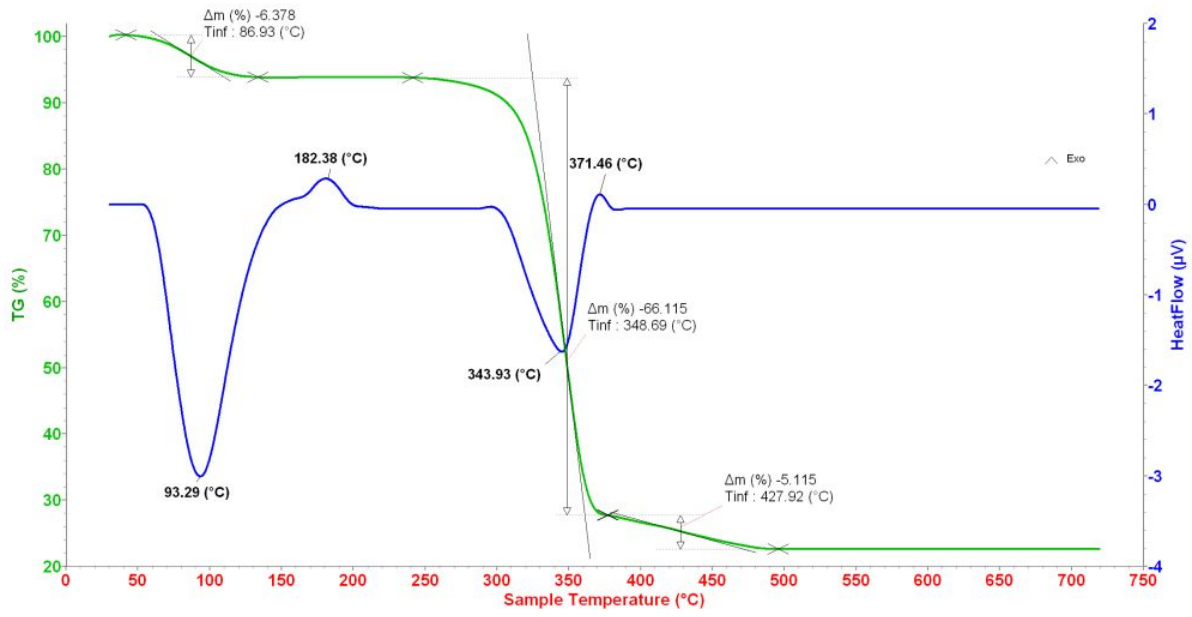

**Figure S2.** TGA/DSC curves of TC

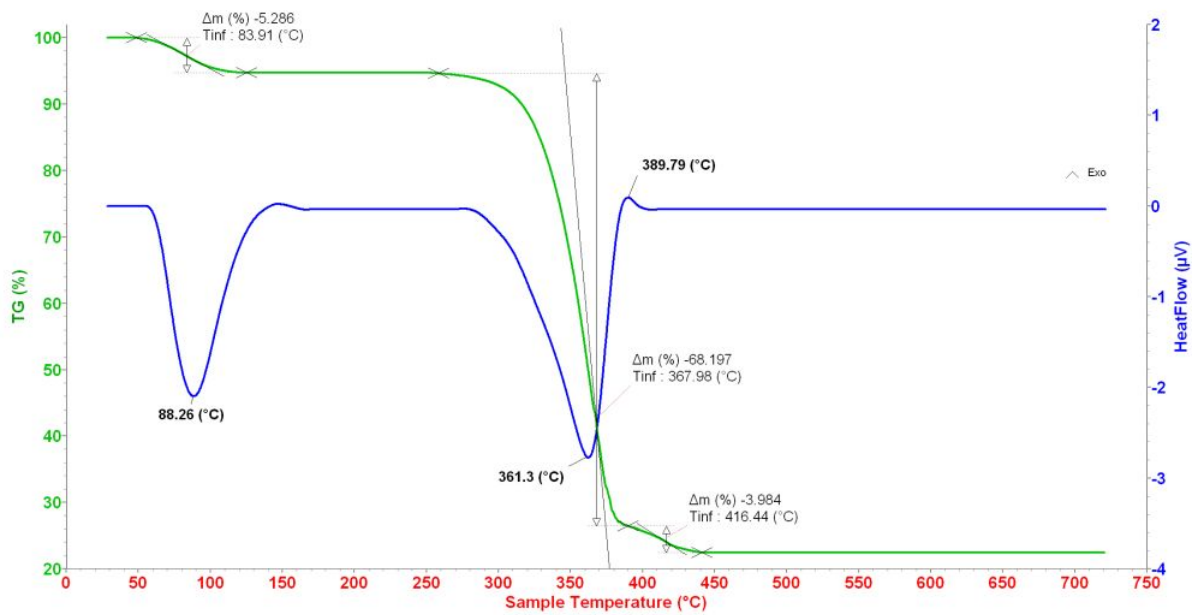

**Figure S3.** TGA/DSC curves of MTC

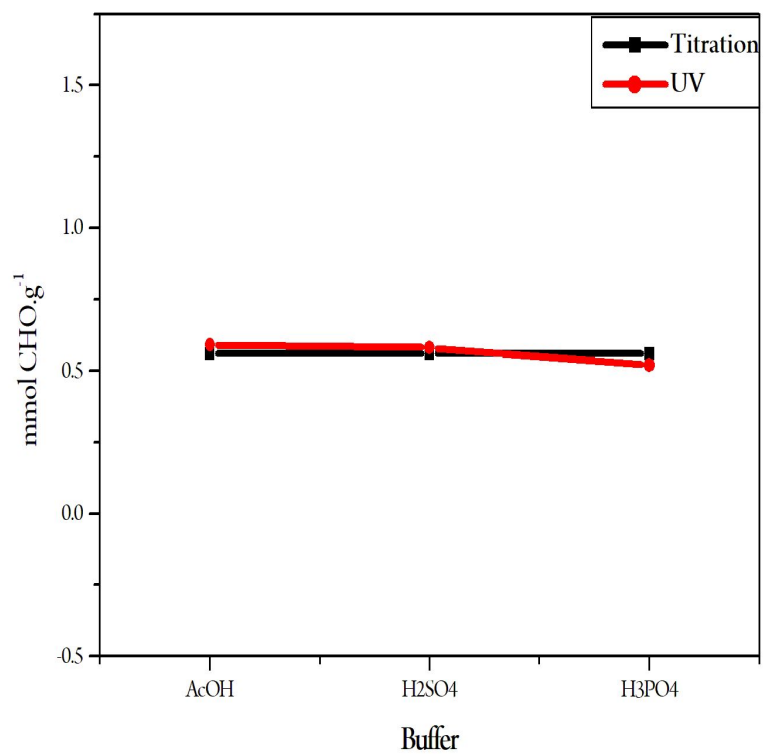

**Figure S4.** Effects of factors to the number of CHO groups, which analyzed by titration (the black line) and spectrophotometry (the red line): Elements of buffer solution

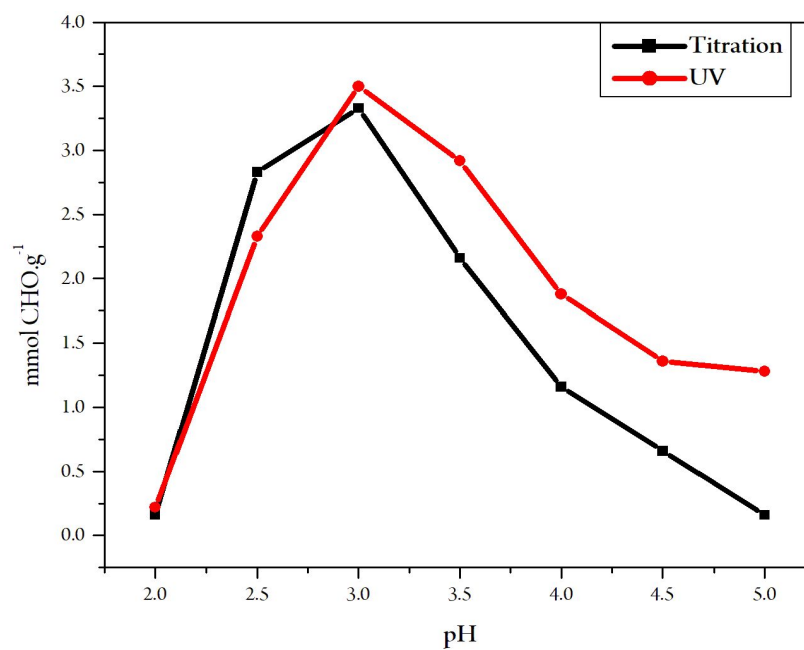

**Figure S5.** Effects of factors to the number of CHO groups, which analyzed by titration (the black line) and spectrophotometry (the red line): pH of buffer solution

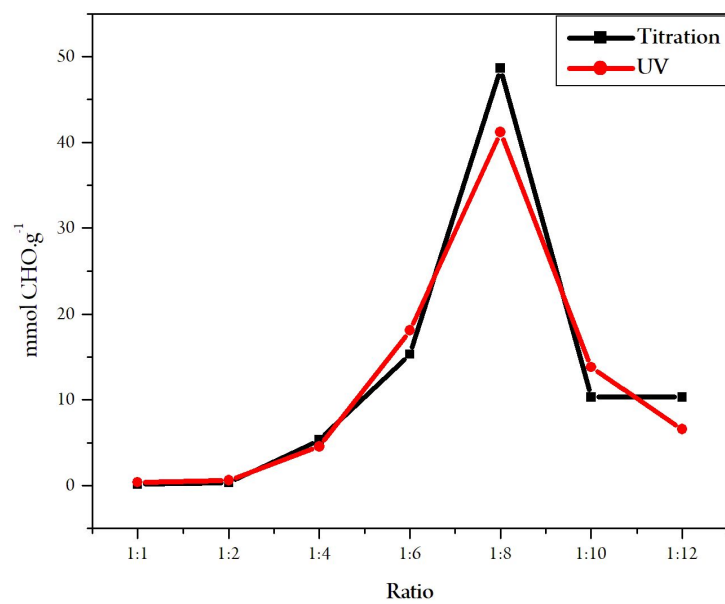

**Figure S6.** Effects of factors to the number of CHO groups, which analyzed by titration (the black line) and spectrophotometry (the red line): Mass ratio between TCR:KIO<sub>4</sub>

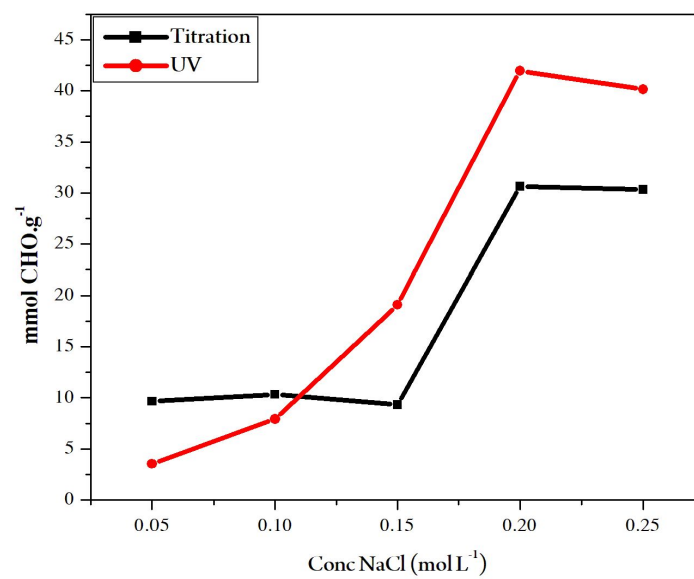

**Figure S7.** Effects of factors to the number of CHO groups, which analyzed by titration (the black line) and spectrophotometry (the red line): Ionic strength

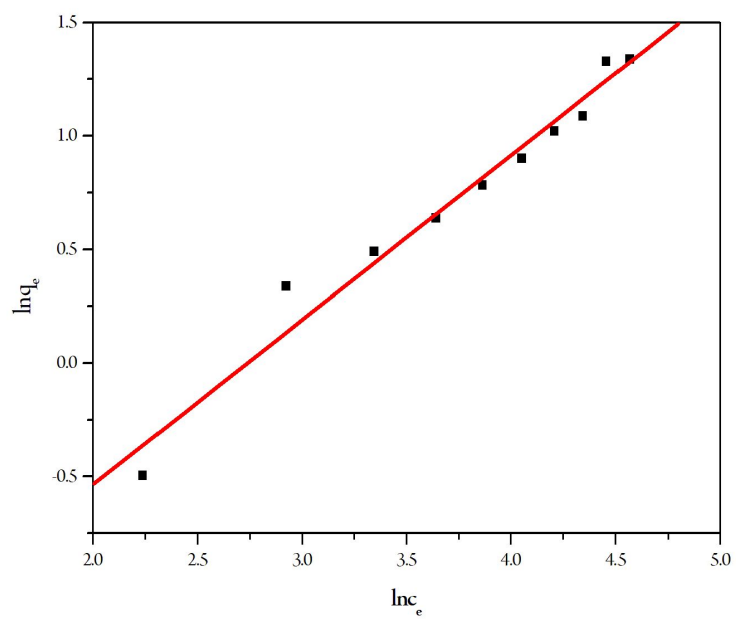

**Figure S8.** Paradigm of isotherm equation: Freundlich



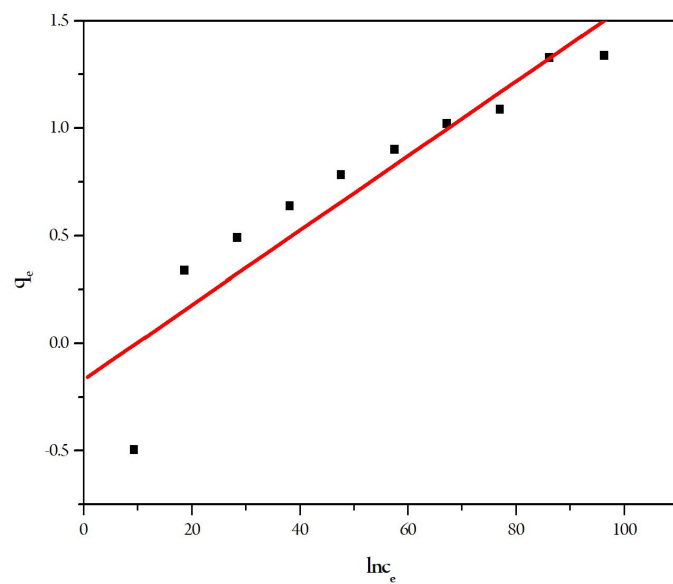

**Figure S9.** Paradigm of isotherm equation: Temkin

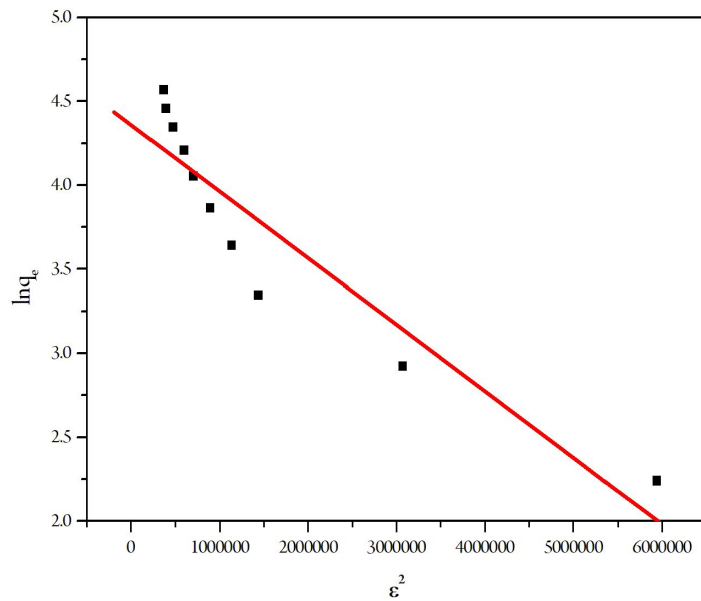

**Figure S10.** Paradigm of isotherm equation Dubinin – Radushkevich
